# Supplementary material for: Detection of Alpha-Rod Protein Repeats Using a Neural Network and Application to Huntingtin
Source: PLoS Comput Biol. 2009 Mar 13;5(3):e1000304. doi: 10.1371/journal.pcbi.1000304 (PMC2647740; doi:10.1371/journal.pcbi.1000304)
Supplement: Dataset S2 — Full length multiple sequence alignment of human huntingtin and representative homologs (0.19 MB TDS) [file pcbi.1000304.s002.tds]

>human
-----------------------------MATLEK---LMKAFESLKSFQQQQQQQQQQQQQQQQQQQQQQQPPPPPPPP
PPPQLP--QPPPQAQPLLPQPQPPP--------PPPPPPPGPAVAEEPLHRPKKELSATKKDRVNHCLTICENIVAQS--
------VRNSPEFQKLLGIAMELFLLCSDDAESDVRMVADECLNKVIKALM-DSNLPRLQLELYKEIK------------
--------------------------------------------------------------------------------
---------------KNGAPRSLRAALWRFAELAHLVRPQKC-RPYLVNLLPCLTRTSKR-PEESVQETLAA-----AVP
KIMASFGNFANDNE---IKVLLKAFIANLKSSSPTIRRTAAGSAVSICQH-SRRTQYFYSWLL-NVLLGLLVPVEDEH--
----------------STLLILGVLLTLRYLVPLLQQQVKDTSLKGSFG-------VTRKEMEVSPSAEQLVQVYELTLH
HTQH--------------QDHNVVTGALELLQQLFRTPPPE------------LLQTLTAVGGIGQLTAAKEESGGRSRS
GSIVELIAGGGSSCSP----------------------------------------------------------------
--------------------------------------------------------------------------------
------------------------------------------------------VLSRKQKGKVLLGEEEALEDDSESRS
DVSSSALTASVKDEISGELAASSGVSTPG--------SAGHDIITEQPRSQ-HTLQA-DSVDLASCD------------L
TSSATDGDEEDILSHSSSQVSAVPSDPAMDLNDG---------------TQASSPISDSSQTTTEGPDSAVTPSDSSEIV
LDGTDNQYLGLQIGQPQDEDEE-ATGILPDEASEAFRNSSMALQQAHLLKNMSHCRQPSDSSVDKFVLR-----------
-----------DEATEPGDQENKPCRIKG-DIGQSTDDDSAPLVHCVRLLSASFLLTGGK-NVLVPDRDVRVSVKALALS
CVGAAVALHPESFFSKLYKVPLDTT-------------------------------------------------------
--------------------------------------------------------------------------------
---------------------------EYPEEQYVSDILNYIDHGDPQVRGATAI--LCGTLICSILSRSRFHVGDWMG-
------TIRTLTGNTFSLA---DCIPLLRKTLKDESSVTCKLACTAVRNCVMSLCSSSYSELGL----------------
--------------------------------------------------------------------------------
----------------------------------------------QLIIDVLTLRNSSYWLVRTELLETLAEIDFRLVS
FLEAKAENLHRG------------------------------------AHHYTGLLKLQERVLNNVVIHLLGDEDPRVRH
VAAASLIRLVPKLFYKCDQGQADPVVAVARD----QSSVYLKLLMHETQPPSHFSVSTITRIYRGYNLL-----------
--------------------------------------------------------------------------PSITDV
TMENNLSRVIA-AVSHELITST--------TRALTFGCCEALCLLSTAFPVCIWSLGWHCG-------------------
-----------------------VPPLSAS-----------DESRKSCTVGMATMILT-LLS-SAWFPLDLSAHQDALIL
AGNLLAASAPKSLRSSWASEEEANPAAT----------KQEEVWPALGDRALVPMVEQLFSHLLKVINICAHVLDDVAPG
--PAIKAALPSLTNPPSLSPIRRKGKEKEP-------------------GEQASVPLSPKKGSEASAASRQSDTSGPVTT
SKSSSLGSFYHLPSYLKLHDVLKATHANYK---------------VTLDLQNSTEKFGGFLRSALDVLSQILELATLQD-
--IGKCVEEI----LGYLKSCFSREPMMATVCVQQLLKTLFGTNLASQFDGLSS---------------NPSKSQGRAQR
LG---------SSSVRPG-LYHYCFMAPYTHFTQALADASLRNMVQAEQENDTSGWFDVLQKVSTQLKTNLTSVTKN---
----RADKNAIHNHIRLFEPLVIKALKQYTTTTCVQLQKQ-VLDLLAQLVQLRVNYCLLDSDQVFIGFVLKQFEYIEVGQ
--FRESEA--IIPNIFFFLVLLSYERYH--------------SKQIIGIPKIIQL-------------------------
-----------------------------------CDGIMASGRKAVTHAIPALQPIVHDLFVLRGTNK-----------
--------------------ADAGKELETQKEVVVSMLLRLIQYHQVLEMFILVLQQCHK-------------------E
NEDK---------WKRLSRQI-----------ADIILPMLAKQQMHIDSHE---ALGVLNT----------LFEILAPSS
LRPVDMLLRSMFVTPNTMAS------------------------------------------------------------
----------------------------------------------VSTVQLWISGILAILRVLISQSTEDIVLSRIQEL
SFSPYLISCTVINRLRDGDSTS-TLEEHS------EGKQ-IKNLPEETFSR----------------FLLQLVGILLEDI
VTKQLK------------VEMSEQQHTFYCQELGTLLMCLIHIFKS----------------------------------
--------------------------------------------------------------------------------
------------------GMFRRITAAATRLFRSDGC---------GGSFYTLDSLNLRARS---MITTHPALVLLWCQI
LLLVNHTDYRWWAEVQQTP--------------KRHSLSSTKLLSPQMSGEEEDSDLAAKLGMCNREIVRRGALILFCDY
VCQN---------LHDSEHLTWLIVNHI------------------------QDLISLSHEPP------VQDFIS-----
-AVHRNSAAS--GLFIQAIQSR-----CENLSTPTMLKKTLQCLEGI-HLSQSGAVLTLYVD-RLLCTPFR-------VL
ARMVDILACRRVEMLLAAN-------------------------LQSSMAQLPMEELNRIQEYLQSSGLAQRHQ------
-----------RLYSLLDRFRLSTMQDSLSPSPPVSS--------HPLDGDGHVSLETVS-----------------PDK
DWYVHLVKSQCWTRSD------------------------------------SALLEGAELVNRIPAEDMNAFMMN--SE
FNLSLLAPCLSL--GMSEISGG--------------------------------QKSALFEAAREVTLARVSGTVQQLPA
VHHVFQPELP-----------AEPAAYWSKLNDLFGDAA--------------------------LYQSLPTLARALAQY
LVVVSKLPSH--LHLPPEKEKDIVKFVVATLEALSWHLIHEQ------IPLSLDLQAGLDCCCLALQLPGLWSVVSSTEF
VTHACS-----LIYCVHFILEA--VAVQPGEQLLS----------------------PERRTNTPKAISEEEEEVDPNTQ
NPKYITAACEMVAEMVESL-----------------------------QSVLALGHKR---NSGVPAFLTPLLRNIIISL
ARLPLVNSY-TRVPPLVWK-LGW-SPKPG-GDFGTAFPEIP---VEFLQEKEVFKEFIYRINTL----------------
--------GWTSRTQFEETWATLLGVLVTQPLVMEQEE-SPPEEDTERTQINVLAVQAITSLVLSAMTVPVAGNPAV---
-------------------SCLEQQPRNKPLKALDTRFGRK-LSIIRGIVEQEIQAMVSK----------RENIATHHLY
QAWDPVPSLSPATTG-ALISHEKLLLQINPERELGSMSYKLGQVSIHSVWLGNSITPLREEEWDEEEEEEADA-------
----------------------------PAPSSPPTSPVNSRKHRAGVDIHSCSQFLLELYSRWILP-SSSAR-------
RTPAILISEVVRSLLVVSD-------LFTERNQFELMYVTLTELRRVHPS-EDEILAQYLVPATCKAAAVLGMDKAV---
------AEPVSRLLES-TLRSSHLPSRVGALHGVLYVLECDLL---------DDTAKQLIPVISDYLLSNLKGIAHC-VN
IHSQQHV----LVMCATAFYLIEN----YPLDVGPEFSASIIQMCGVMLSGSE-ESTPSIIYHCALRGLERLLLSEQLS-
--------------------------------------------------------------------------------
--------------------------------------------------------------------------------
--------------------------------------------------------------------------------
--------------------------------------------------------------------------------
--------------------------------------------------------------------------------
---------RLDAESLVKLSVDRVNVH-----SPHRAMAAL------------------GLMLTCMYT------GKEKVS
PG-RTSDP----------------------------------------------------------------NPAAPDSE
SVIVAMERVSV-LFDRIR--KG-FPCEARVVA-RILPQFLDDFFPP-----QDIMNKVIGEFLSNQQ-PYPQFMA--TVV
YKVFQTLHSTG-----QSSMVRDWVMLSLSNFTQRAPVAMATWSLSCFFVSAST-----SPWVAAI--LPHVISRMGKL-
---------------------------EQVDVNLFCLVATDFYRHQIE--------EELDRRAFQSVLEVVAA-------
-PGSPYHRLLTCLRNVHKVTTC----------------
>Canis
-----------------------------MATLEK---LMKAFESLKSFQQQQQQQQQQ-----------------PPPP
PPPQPP--QPLPQAQPPLPQP-PPP--------PPPPPPPGPAVAEEPLHRPKKELSATKKDRVNHCLTICENIVAQS--
------LRNSPEFQKLLGIAMELFLLCSDDAESDVRMVADECLNRVIKALM-DSNLPRLQLELYKEIK------------
--------------------------------------------------------------------------------
---------------KNGAPRSLRAALWRFAELAHLVRPQKC-RPYLVNLLPCLTRISKR-PEESVQETLAA-----AVP
KIMASFGNFANDNE---IKVLLKAFIANLKSSSPTIRRTAAGSAVSICQH-SRRTQYFYSWLL-NVLLGLLVPVEGEH--
----------------STLLILGVLLTLRYLVPLLQQQVKDTSLKGSFG-------VTRKELEVSPSTEQLIQVYELTLH
YTQH--------------QDHNAVTGALELLQQLFRTPPPE------------LLQALSTPGG-GLLNATQQQPGCRSRS
SSIVELLAGGGSSCSP----------------------------------------------------------------
--------------------------------------------------------------------------------
------------------------------------------------------VLSRKQKGKVLFGEAAALDDDSESRS
EGSSPAFTASVKGEIGGELAASSGVSTPGSA-SSATDSVGHDIITEQPRSQ-HTLQP-DSVDLTSCD------------L
ASAATDGDEEDILSHSSSQISAVPSDPAMDLNDG---------------TQASSPVSDSSQTTTEGPDSAVTPSDSSEIV
LDGADSQYSGMQIGQPQDEDEE-TAGILPDEDADAFRTSSVALQQAHLLKSMGHSRQPSDSSIDKFVSR-----------
-----------DEATETGDQENKPCRIKG-DIGQSTDDDSVPLVHCVRLLCASFLLTGEK-NVLVPDRDVRVSVKALALS
CVGAAVALHPESFFSKLYKVPLDTM-------------------------------------------------------
--------------------------------------------------------------------------------
---------------------------EYPEEQYVSDILNYIDHGDPQVRGATAV--LCGTLISSILSRSRFQVGDWMG-
------TVRTLTGSTFSLA---DCVPLLQKTLKDESSVTCKLACTAVRHCVMSLCSSSYSELGL----------------
--------------------------------------------------------------------------------
----------------------------------------------QLITNVLTLKDSSYWLVRTELLETLAEIDFRLVS
FLETKAENLHRG------------------------------------THHYTGLLKLQERVLHDVVIYLLGDEDPRVRH
VAAAALMRLVPKLFYKCDQGQADPVVAVARD----QSSVYLKLLMHEAQPPSHFSVSTITRIYRGYNLL-----------
--------------------------------------------------------------------------PSMTDV
TVENNLSRVIA-AVSRELVTST--------TRALTFGCCEALCLLSTAFPVCIWSLGWHCG-------------------
-----------------------VPPLSTS-----------DESRKSCTVGMATMILT-LLS-SAWFPLDLSAHQDALVL
AGNLLAASAPKSLRSSWTSEEEANPATS----------KQEEVWPALGDRTLVPMVEQLFSHLLKVINICAHVLDDVAPG
--PAIKAALPSLTNPPSLSPIRRKGKEKEP-------------------GEPASVPLSPKKGSEASPASRQSDAPGPVTA
NKSSSLGSFCHLPSYLKLHDVLKATHANYK---------------VTLDLQNSTEKFGGFLRSALDVLSQILELATLQD-
--IGKCVEEI----LGYLKSCFSREPVMATVCVQQLLKTLFGTNLASQFDGLSS---------------NPSKSQGRAQR
LG---------SSSVRPG-LYHYCFMAPYTHFTQALADASLRTMVQTEQDHGTSGWFDVLQKVSTQLKTNLTSATKN---
----RADKNAIHNHIRLFEPLVIKALKQYTTTTSVQLQRQ-VLDLLAQLVQLRVNYCLLDSDQVFIGFVLKQFEYIEVGQ
--FRESEA--IIPNIFFFLVLLSYERYH--------------SKQIIGIPKIIQL-------------------------
-----------------------------------CDGIMASGRKAVTHAIPALQPIVHDLFVLRGTNK-----------
--------------------ADAGKELETQKEVVVSMLLRLIQYHQVLEMFILVLQQCHK-------------------E
NEDK---------WKRLSRQI-----------ADVILPMLAKQQMHIDSHE---ALGVLNT----------LFEILAPSS
LRPVDMLLRSMFVTPDTMAS------------------------------------------------------------
----------------------------------------------VSTVQLWISGILAILRVLISQSTEDIVLSRIQEL
SFSPYLISCPIINRLRDGDSTS-IPEEHH------EGKQ-MKTLPEETFSR----------------FLLQLVGILLEDI
VTKQLK------------VEMSEQQHTFYCQELGTLLMCLIHIFKS----------------------------------
--------------------------------------------------------------------------------
------------------GMFRRITAAASRLFTVDST---------DGSFYGLERLNARVRA---MVPTHPALVLLWCQI
LLLVSHTDYRWWAEVQQTP--------------RRRSLSSTKSLNPQMCGEEEDPDAACKLGMCNREIVRRGALILFCDY
VCQN---------LHDSEHLTWLIVNHI------------------------QDLINLSHEPP------VQDFIS-----
-AVHRNSAAS--GLFIQAIQSR-----CENLSTPTTLKKTLQCLEGI-HFSQSGAVLTLYVD-KLLCTPFR-------VL
ARMVDTLACRRVEMLLAAN-------------------------LQSGMAQLPVEEVSRVQEYLQRSGLAQRHQ------
-----------RLYSLLDRLRLATAPGSRGPSPPVTS--------HPLDGDGPLALEIVI-----------------PDK
DWYLRLVKSQCWTRSD------------------------------------SALLEGAELVNRIPPSDMSTFMMN--SE
FNLSLLAPCLGL--GMREISGG--------------------------------QRSPLFEAARLVTLDRVTSLVQQLPA
VHHVFQPFLP-----------MEPTAYWSKLNDLFGDAV--------------------------LYRSLTTLARALAQY
LLVFSKLPSH--LHLPPEKERDTVKFVVMTLEALAWHLIHEQ------IPLSLDLQAGLDCCCLALQLPSLWSVLSSPEM
VTHACS-----LIHCVRFILEA--VVVQPGDQLLS----------------------PERRVNMPKAAR--VDEVDPNTQ
NLAYITTACQMVAEMVESL-----------------------------PSVLALGHKR---NSNTPAFLTSVLRNIVISL
ARLPLVNSY-TRVPPLVWK-LGW-SPEPG-GDFGTAFPEIP---VEFLQEKEVFKEFIYRINAL----------------
--------GWTSRTQFEETWATLLGVLVTQPLVMEQEE-SPPEEDTERTQINVLAVQAITSLVLSAMTVPVAGNPAV---
-------------------SCLEQQPRNKPLKALDTRFGRK-LSIIRGIVEQEIQAMVSK----------RENIATHHLY
QAWDPVPSLSPATTG-ALISHDKLLLQINPERELGNMSYKLGQVSIHSVWLGNSITPLREEEWEEEEEEEADV-------
----------------------------PAPASPPTSPVNSRKHRAGVDIHSCSQFLLELYSRWILP-SGSAR-------
RTPIILISEVVRSLLVVSD-------LFTERTQFEMMYLTLTELRRVHPA-EDEILIQYLVPATCKAAAVLGMDKAV---
------AEPVSRLLET-TLRSSHLPSKVGALHGALYVLECDLL---------DETAKQLVPVISDYLLSNLKGAAHC-VN
IHSQQHV----LVMCATAFYLIEN----YPLDVGPEFSASIIQMCGVMLSGSE-ESTPSIIYHCILRGLERLLLSEQLC-
--------------------------------------------------------------------------------
--------------------------------------------------------------------------------
--------------------------------------------------------------------------------
--------------------------------------------------------------------------------
--------------------------------------------------------------------------------
---------RLDAESLVKLSVDRVNVH-----SPHRAMAAL------------------GLMLTCMYT------GKEKIS
PG-RTSDP----------------------------------------------------------------SPTAPDSE
SVIVAMERVSV-LFDRVR--KG-FPCEARVVA-RILPQFLDDFFPP-----QDVMNKVIGEFLSNQQ-PYPQFMA--TVV
YKVFQTLHSTG-----QSSMVRDWVMLSLSNFTQRTPVAMAVWSLSCFFVSAST-----SPWVSAV--LPHVISRMGKL-
---------------------------EQVDVNLFCLVATDFYRHQIE--------EELDRRAFQSVFEVVAA-------
-PGNPYHRLLTCLRNVHKVTMC----------------
>Mouse
-----------------------------MATLEK---LMKAFESLKSFQQQQQQQPPPQ------------APPPPPPP
PPPQPP--QPPPQGQ------------------PPPPPPPLPGPAEEPLHRPKKELSATKKDRVNHCLTICENIVAQS--
------LRNSPEFQKLLGIAMELFLLCSDDAESDVRMVADECLNKVIKALM-DSNLPRLQLELYKEIK------------
--------------------------------------------------------------------------------
---------------KNGAPRSLRAALWRFAELAHLVRPQKC-RPYLVNLLPCLTRTSKR-PEESVQETLAA-----AVP
KIMASFGNFANDNE---IKVLLKAFIANLKSSSPTVRRTAAGSAVSICQH-SRRTQYFYNWLL-NVLLGLLVPMEEEH--
----------------STLLILGVLLTLRCLVPLLQQQVKDTSLKGSFG-------VTRKEMEVSPSTEQLVQVYELTLH
HTQH--------------QDHNVVTGALELLQQLFRTPPPE------------LLQALTTPGGLGQLTLVQEEARGRGRS
GSIVELLAGGGSSCSP----------------------------------------------------------------
--------------------------------------------------------------------------------
------------------------------------------------------VLSRKQKGKVLLGEEEALEDDSESRS
DVSSSAFAASVKSEIGGELAASSGVSTPG--------SVGHDIITEQPRSQ-HTLQA-DSVDLSGCD------------L
TSAATDGDEEDILSHSSSQFSAVPSDPAMDLNDG---------------TQASSPISDSSQTTTEGPDSAVTPSDSSEIV
LDGADSQYLGMQIGQPQEDDEEGAAGVLSGEVSDVFRNSSLALQQAHLLERMGHSRQPSDSSIDKYVTR-----------
-----------DEVAEASDPESKPCRIKG-DIGQPNDDDSAPLVHCVRLLSASFLLTGEK-KALVPDRDVRVSVKALALS
CIGAAVALHPESFFSRLYKVPLNTT-------------------------------------------------------
--------------------------------------------------------------------------------
---------------------------ESTEEQYVSDILNYIDHGDPQVRGATAI--LCGTLVYSILSRSRLRVGDWLG-
------NIRTLTGNTFSLV---DCIPLLQKTLKDESSVTCKLACTAVRHCVLSLCSSSYSDLGL----------------
--------------------------------------------------------------------------------
----------------------------------------------QLLIDMLPLKNSSYWLVRTELLDTLAEIDFRLVS
FLEAKAESLHRG------------------------------------AHHYTGFLKLQERVLNNVVIYLLGDEDPRVRH
VAATSLTRLVPKLFYKCDQGQADPVVAVARD----QSSVYLKLLMHETQPPSHFSVSTITRIYRGYSLL-----------
--------------------------------------------------------------------------PSITDV
TMENNLSRVVA-AVSHELITST--------TRALTFGCCEALCLLSAAFPVCTWSLGWHCG-------------------
-----------------------VPPLSAS-----------DESRKSCTVGMASMILT-LLS-SAWFPLDLSAHQDALIL
AGNLLAASAPKSLRSSWTSEEEANSAAT----------RQEEIWPALGDRTLVPLVEQLFSHLLKVINICAHVLDDVTPG
--PAIKAALPSLTNPPSLSPIRRKGKEKEP-------------------GEQASTPMSPKKVGEASAASRQSDTSGPVTA
SKSSSLGSFYHLPSYLKLHDVLKATHANYK---------------VTLDLQNSTEKFGGFLRSALDVLSQILELATLQD-
--IGKCVEEV----LGYLKSCFSREPMMATVCVQQLLKTLFGTNLASQFDGLSS---------------NPSKSQCRAQR
LG---------SSSVRPG-LYHYCFMAPYTHFTQALADASLRNMVQAEQERDASGWFDVLQKVSAQLKTNLTSVTKN---
----RADKNAIHNHIRLFEPLVIKALKQYTTTTSVQLQKQ-VLDLLAQLVQLRVNYCLLDSDQVFIGFVLKQFEYIEVGQ
--FRESEA--IIPNIFFFLVLLSYERYH--------------SKQIIGIPKIIQL-------------------------
-----------------------------------CDGIMASGRKAVTHAIPALQPIVHDLFVLRGTNK-----------
--------------------ADAGKELETQKEVVVSMLLRLIQYHQVLEMFILVLQQCHK-------------------E
NEDK---------WKRLSRQV-----------ADIILPMLAKQQMHIDSHE---ALGVLNT----------LFEILAPSS
LRPVDMLLRSMFITPSTMAS------------------------------------------------------------
----------------------------------------------VSTVQLWISGILAILRVLISQSTEDIVLCRIQEL
SFSPHLLSCPVINRLRGGGGNV-TLGECS------EGK--QKSLPEDTFSR----------------FLLQLVGILLEDI
VTKQLK------------VDMSEQQHTFYCQELGTLLMCLIHIFKS----------------------------------
--------------------------------------------------------------------------------
------------------GMFRRITAAATRLFTSDGC---------EGSFYTLESLNARVRS---MVPTHPALVLLWCQI
LLLINHTDHRWWAEVQQTP--------------KRHSLSCTKSLNPQKSGEEEDSGSAAQLGMCNREIVRRGALILFCDY
VCQN---------LHDSEHLTWLIVNHI------------------------QDLISLSHEPP------VQDFIS-----
-AIHRNSAAS--GLFIQAIQSR-----CENLSTPTTLKKTLQCLEGI-HLSQSGAVLTLYVD-RLLGTPFR-------AL
ARMVDTLACRRVEMLLAAN-------------------------LQSSMAQLPEEELNRIQEHLQNSGLAQRHQ------
-----------RLYSLLDRFRLSTVQDSLSPLPPVTS--------HPLDGDGHTSLETVS-----------------PDK
DWYLQLVRSQCWTRSD------------------------------------SALLEGAELVNRIPAEDMNDFMMS--SE
FNLSLLAPCLSL--GMSEIANG--------------------------------QKSPLFEAARGVILNRVTSVVQQLPA
VHQVFQPFLP-----------IEPTAYWNKLNDLLGDTT--------------------------SYQSLTILARALAQY
LVVLSKVPAH--LHLPPEKEGDTVKFVVMTVEALSWHLIHEQ------IPLSLDLQAGLDCCCLALQVPGLWGVLSSPEY
VTHACS-----LIHCVRFILEA--IAVQPGDQLLG----------------------PESRSHTPRAVR--KEEVDSDIQ
NLSHVTSACEMVADMVESL-----------------------------QSVLALGHKR---NSTLPSFLTAVLKNIVISL
ARLPLVNSY-TRVPPLVWK-LGW-SPKPG-GDFGTVFPEIP---VEFLQEKEILKEFIYRINTL----------------
--------GWTNRTQFEETWATLLGVLVTQPLVMEQEE-SPPEEDTERTQIHVLAVQAITSLVLSAMTVPVAGNPAV---
-------------------SCLEQQPRNKPLKALDTRFGRK-LSMIRGIVEQEIQEMVSQ----------RENTATHHSH
QAWDPVPSLLPATTG-ALISHDKLLLQINPEREPGNMSYKLGQVSIHSVWLGNNITPLREEEWDEEEEEESDV-------
----------------------------PAPTSPPVSPVNSRKHRAGVDIHSCSQFLLELYSRWILP-SSAAR-------
RTPVILISEVVRSLLVVSD-------LFTERTQFEMMYLTLTELRRVHPS-EDEILIQYLVPATCKAAAVLGMDKTV---
------AEPVSRLLES-TLRSSHLPSQIGALHGILYVLECDLL---------DDTAKQLIPVVSDYLLSNLKGIAHC-VN
IHSQQHV----LVMCATAFYLMEN----YPLDVGPEFSASVIQMCGVMLSGSE-ESTPSIIYHCALRGLERLLLSEQLS-
--------------------------------------------------------------------------------
--------------------------------------------------------------------------------
--------------------------------------------------------------------------------
--------------------------------------------------------------------------------
--------------------------------------------------------------------------------
---------RLDTESLVKLSVDRVNVQ-----SPHRAMAAL------------------GLMLTCMYT------GKEKAS
PG-RASDP----------------------------------------------------------------SPATPDSE
SVIVAMERVSV-LFDRIR--KG-FPCEARVVA-RILPQFLDDFFPP-----QDVMNKVIGEFLSNQQ-PYPQFMA--TVV
YKVFQTLHSAG-----QSSMVRDWVMLSLSNFTQRTPVAMAMWSLSCFLVSAST-----SPWVSAI--LPHVISRMGKL-
---------------------------EQVDVNLFCLVATDFYRHQIE--------EEFDRRAFQSVFEVVAA-------
-PGSPYHRLLACLQNVHKVTTC----------------
>Monodelphis
-----------------------------MATLEK---LMKAFESLKSFQQQQQQPPAPP----------------PPPP
PPPQPPQAQPLPQPQQSPQQP-PPP--------PPPPPPPGPSGVEEPAHRPKKELSTTKKDRVNHCLTICENIVAQS--
------LRNSPEFQKLLGIAMELFLLCSDDAESDVRMVADECLNKVIKALM-ESNLPRLQLELYKEIK------------
--------------------------------------------------------------------------------
---------------KNGASRSLRAALWRFAELAHLVRPQKC-RPYLVNLLPCLTRISKR-TEESVQETLAA-----AIP
KIMASFGNFANDNE---IKVLLKAFIANLKSSSPTIRRTAAGSAVSICQH-SRRTQYFYTWLL-NVLLGLLVPVEEEH--
----------------STLFILGVLLTLRYLIPLLQQQVKDMSLKGSFG-------VTRKETEISPSTDQLIQVYELTLH
YTQH--------------QDHNVVTGALELLQQLFKTPPVE------------LLQALTTAGGFGQVNVTKEEFS-RSRS
GSIVELIAGGGSSCSP----------------------------------------------------------------
--------------------------------------------------------------------------------
------------------------------------------------------VLSRKQKGKVLLGEEEGLEDDPESRS
EVSSATFAASMKSEITGELASSSGVSTPVST-SSAADSTGHDIITEQPRSQ-HTLQS-DPVDLTGCD------------L
TSAATDGDEEDMLSRSSSQISAVPSDPAVDMNDG---------------TQASSPISDSSQTTTEGPDSAVTPSDSSEIV
LDGAESQYSGMQIGQLQDEDDE-TSNVLPDETPDSFRDSTIALQQPHLLKSTGHSRQPSDSSVDRFLSK-----------
-----------DEAVELGDHESKPSRVKG-DIGHFTDTDLAPLVHCVRLLSASFLLTGEK-GALVPDRDVRVSVKALAVS
CVGAAVALHPESFFSKLYKTPLETM-------------------------------------------------------
--------------------------------------------------------------------------------
---------------------------EHPEDQYVSDVLNYIDHGDPQIRGATAI--LCGTIIYSILNKSRFSVENWLT-
------AVRNSTGNTFSLV---DCIPLLQKSLKDESSVTCKLACTAVRHCVMSLCSSCFSELGL----------------
--------------------------------------------------------------------------------
----------------------------------------------QLIIDVLTLRNSSYWLVRTELLDTLAEIDFRLIS
FLEAKADHLHKG------------------------------------SHHYTGLLKLQDRVLNNVVIYLLGDEDPRVRH
VAASSLIRLVPKLFYNCDQGQTDPVVAVARD----QSNVYLKLLMHETQPPSHFSVSTITRTYRGYNLL-----------
--------------------------------------------------------------------------PSITDV
TMENNLSRVIA-AVSHALTTST--------TRALTFGCCEALCLLSTAFPVCIWSLGWHCG-------------------
-----------------------VPLLSPS-----------DESRKSCTVGMATTVLT-LLS-SAWFPLDLSAHQDAIIL
AGNLLAASAPKSLKNPWTTEDEANPGAM----------KQEEPWPALGDRVLVQMVEQLFSHLLKAINICAHVLDDVTPG
--PAIKAALPSLTNPPSLSPIRRKGKEKEP-------------------GEQASVPLSPKKGNEASPASRSSDPSGPAIT
SKSSTLGSFYHLPSYLKLYDVLKATHANYK---------------VTLDLQNSSEKFGGFLRAALDVLSQILELATLQD-
--IGKCVEEI----LGYLKSCFNREPTMATVCVQQLLKTLFGTNLASQYDGLSS---------------KPSKSQGKAQR
LG---------SSSLRPG-LYHYCFMAPYTHFTQALADASLRNMVQADQEHDTSGWFDVLQKVSTQLKTNLTSVTKH---
----RADKNAIHNHIRLFEPLVIKALKQYTTTTSVQLQRQ-VLDLLAQLVQLRVNYCLLDSDQVFIGFVLKQFEYIEVGQ
--FRESEA--IIPNIFFFLVLLSYERYH--------------SKQIIGIPKIIQL-------------------------
-----------------------------------CDGIMASGRKAVTHAIPALQPIVHDLFVLRGTNK-----------
--------------------ADAGKELETQKEVAVSMLLRLIQYHQVLEMFILVLQQCHK-------------------E
NEDK---------WKRLSRQI-----------ADIILPMLAKQQMHIDSHE---ALGVLNT----------LFEILAPSS
LRPVDMLLRSMFVTPNTMAS------------------------------------------------------------
----------------------------------------------VSTVQLWISGILAILRVLISQSTEDIVLSRIQEL
SFSPHLISCQIIKKLRDGGSSLPTPEDQS------EVKQAAKCLPEETFSR----------------FLLQLVGILLEDI
VMKQLK------------VEMSEQQHTFYCQELGTLLMCLIHIFKS----------------------------------
--------------------------------------------------------------------------------
------------------GMFRRITAAATRLFTGDGS---------DGSFYTLESLSELVRS---MIPTHPSLVLLWCQI
LLLVNYTNYNWWSEVHQTP--------------KRHSLSSTKLLSPQMSSDGEDSHLASTLGVCNREIVRRGALILFCDY
VCQN---------LYDSEHLTWLIVNHI------------------------QDLISLSHEPP------VQDFIS-----
-AVHRNSAAS--GLFIQAIQSR-----CENLSSPTTLKKTLQCLEGI-HLSQSGAVLMLYVD-KLLCTPFR-------VL
ARMVDTLACRRVEMLLAAN-------------------------LQNSMSQLPVEELNRIQEYLQKSGLAQRHQ------
-----------RLYSLLDRFRHTVAPETASPSPVVTS--------HPLDGENHLSLEMIN-----------------PDQ
DWYLSLVKFQCCTKSD------------------------------------SALLEGAELVNRIPPGELTPFMLS--KE
FNLCLLAPCLSL--GVREISSG--------------------------------QSSSLFETARSVTLDRVASLVQQLPS
SHQVFQPLLP-----------IETSAYWNQLSDLFGNAV--------------------------IYQSVTTLACALAQY
LVLLSKLPSH--LQLPPEKESDILKFVVAALEALSWHLIHEQ------MPLSMDLQAVLDCCCLTLQLPALWNMLSSIEY
VTHVCS-----LIHCVRFILEA--IAIQPGDQLLS----------------------PERRKNTPRGIS--EDEIDSNMQ
VPRYITAACEMIAEMVAAL-----------------------------QTVLSLGHKR---NNGIPAFLTPVLKNIIISL
ARLPLVNSY-TRVPPLVWK-LGW-SPKPG-GEFGTTLPEIP---VEFLQEKEIFKEFIYRINTL----------------
--------GWTSRTQFEETWATLLGVLVTQPIVMDQEE-SQQEEDTERTQINVLAVQAITSLVLSAMTLPVAGNPAV---
-------------------SCLEQQPRNKALKALDTRFGRK-LSVIRGIVEQEIQAMVSK----------RDNIPTHHLY
QAWDPVPSLSPAMSG-ALISHEKLLLQINTEREMGNMSYNLGQVSIHSMWLGNNITPLREEEWDEDEEDDGDL-------
----------------------------PAPSSPPTSPINSRKHRAGVDIHSCSQFLLELYSQWILP-SSSAK-------
RTPVILISEVVRSLLAVSD-------LFTERNQFEMMYLTLTELRRVHPS-EDEILIQYLVPATCKAAAVLGMDKAV---
------AEPVSRLLET-TLRSTHLPSKIGALHGILYVLECDLL---------DETAKQLIPIISDYLLSNLRGIAHC-VN
LHSQQHV----LVTCAAAFYLMEN----YPLDVGPEFSAAVIQMCGVMLSASE-ESTPAIIYHCVLRGLERLLLSEQLS-
--------------------------------------------------------------------------------
--------------------------------------------------------------------------------
--------------------------------------------------------------------------------
--------------------------------------------------------------------------------
--------------------------------------------------------------------------------
---------RLDGESLVKLSVDRVNVH-----SPHRAMAAL------------------GLMLTCMYT------GKEKIS
PG-RTSDP----------------------------------------------------------------NPTAPDSE
SVIVAMERVSV-LFDRIR--KG-FPCEARVVA-RILPQFLDDFFPP-----QDVMNKVIGEFLSNQQ-PYPQFMA--TVV
YKVFQTLHTTG-----QSSMVRDWVMLSLSNFTQRTPVAMAMWSLSCFFVSAST-----SQWVSAI--LPHIISRMGKS-
---------------------------EQVDINLFCLVAIDFYRHQID--------EELDRRAFQSVFEVVAS-------
-PGNPYHRLLTCLQNVHKIAAC----------------
>Gallus
-----------------------------MATMEK---LMKAFESLRSFQQQQVPAAIPE------------EPTQRPAD
PQWKLGSWPPAPTVQFDTDAKSLIPRLNRKTGNAVVPLGTLISSLPELFHFRKKELLTTKKDRVNHCLTICENIVAQS--
------LRNSPEFQKLLGIAMELFLLCSEDVESDVRMVADECLNKVIKALM-DSNLPRLQLELYKEIK------------
--------------------------------------------------------------------------------
---------------KNGASRSLRAALWRFAELAHLVRPQKC-RPYLVNLLPCLTRISKR-PEESVQETLAA-----AIP
KIMAAFGNFANDNE---IKVLLKAFIANLKSSSPTIRRTAAGSAVSICQH-SRRTQYFYAWLL-NVLLGLLVPVEDDH--
----------------PTLLILGVLLTLRYLIPLLQQQVKDTSLKGSFG-------VTRKETEISPSPEQLIQVYELTLH
YTQH--------------QDHNVVTGALELLQQLFRTPPPE------------LLHALTSLGGIAQVSVSKDESAIRSRS
GSIVELIAGGGSSCSP----------------------------------------------------------------
--------------------------------------------------------------------------------
------------------------------------------------------VLARKHKGKILLGEEEGLEDDPETRS
DVSAASFAASVKGEITSELASSSGVSTAGSVGSSAADPTGHDIITEQPRSQ-HTLQS-DSVDLSSCD------------L
TSTATEGEDDDVLSRSSSQISAVQSDPTMDLNDG---------------TQASSPISDSSQTTTEGPDSAVTPSDSSEIV
LEGAEGQYSGMQIGQLQDEEDE-AANILQDDSSESFR-SSIALQQPHLLKTMSHSRQPSDSSVDRFPSK-----------
-----------EDAVEPIDHENKPSRVKG-DIGHYTDGNSAPLVHCVRLLSASFLLTGEK-GALVPDRDVRVSVKALAVS
CVGAAVALHPESFFSKLYKMPLEAMG------------------------------------------------------
--------------------------------------------------------------------------------
---------------------------EDYEEQYVSDILNYIDHGDPQIRGATAI--LCGTIINSILLKSRFDVEKWLV-
------NVRSSTGNLFSLV---DCIPLLQKTLKDESSVTCKLACTAVRHCIMSLCSSSYSELGL----------------
--------------------------------------------------------------------------------
----------------------------------------------QLIVDLLTLKNSSYWLVRTELLETLAEVDFRLVS
FLEGKTDSLHRG------------------------------------VHHYTGLLKIQERVLNDVVICLLGDEDPRVRH
VAAASLMRLVPKLFYNCDQGQADPVVAVARD----QSGVYLKLLMHETQPPSHFAVSTITRTYRGYNML-----------
--------------------------------------------------------------------------QNPTDV
TMENNLSRVVA-AISHALTIST--------TRSLTFGCCEALCLLSTTFPVCTWTVGWHCG-------------------
-----------------------VSQPSPS-----------DDAQKGCTIGMAGMVLS-LLS-STWFPLDLSAHQDALIL
TGNLLAASAPKCLKNPWSAEEDSNQVAA----------KQEEPWPALADRTLVTLVEQLFSHLLKVINICAHVMDDVAPG
--PAVKAALPSLTNPPSLSPIRRKGKEREP-------------------VEQTSVPMSPKKGGETSPATRQTDASGPAPT
SKSSSVGSFYHLPSYLKLYDVLKATHANYK---------------VTLDLQNSNEKFGCFLRSALDVLSQILELATLQD-
--IGKCVEEI----LGYLKSCFNREPTMATVCVQQLLKTLFGTNLASQYDGLSS---------------NTSKAQGKAQR
LG---------SSNLRPG-LYHYCFMAPYTHFTQALADASLRNMVQAEQEHDASGWFDVLQKVSTQLKTNITSAAKH---
----RADKNAIHNHIRLFEPLVIKALKQYTTTTSVQLQRQ-VLDLLAQLVQLRVNYCLLDSDQVFIGFVLKQFEYIEVGQ
--FRESEA--IIPNIFFFLVLLSYERYH--------------SKQIIGIPKIIQL-------------------------
-----------------------------------CDGIMASGRKAVTHAIPALQPIVHDLFVLRGTNK-----------
--------------------ADAGKELETQKEVVVSMLLRLIQYHQVLEMFILVLQQCHK-------------------E
NEDK---------WKRLSRQI-----------ADIILPMLAKQQMHIDSHD---ALGVLNT----------LFEILAPSS
LRPVDMLLRSMFVTPKTMAS------------------------------------------------------------
----------------------------------------------VSTVQLWISGILAILRVLISQSTEDIVLSRVQEL
SFSPYLISRQAINRLRHGENNVSAQEDHS------EVKQ-TKYLPEETFSR----------------FLLQLVGILLEDI
VTKQVK------------VDMNEQQHTFYCQELGTLLMCLIHIFKS----------------------------------
--------------------------------------------------------------------------------
------------------GMFRRITAAATRLFTGDGS---------DGSFYTLESLSDLVQS---MVPTHPSLVLLWCQI
LLLVNYTNYNWWSEVHQTP--------------KRHSLSTTKLLSPQISGDSDESDSESKRGMCNREIVRRGALILFCDY
VCQN---------LHDSEHLTWLIVNHV------------------------QDLINLSHEPP------VQDFIS-----
-AVHRNSAAS--GLFIQAIQSR-----CENLAAPTTLKKTLQCLEGI-HLSQSGAVLTLYVD-KLLCTPFR-------VL
ARMVDTLACRRVEMLLAAT-------------------------LQNSITQLPVEELDRIQEYLQNSGLATRHQ------
-----------RLYSLLDRFRLMVAPDTTSPSPLVTS--------HPLDGEDQPGLENVI-----------------LDK
DWYMSLVRSQCCIKSD------------------------------------SALLEGAELLNRIPQPDLNSFMNS--KE
FNLSLLAPCLSL--GMNEISRD--------------------------------QKSSLFEAARRVTLDHLSATVLNLPA
SHQVFQPLLP-----------TEPSAYWKKLNDIFGDEV--------------------------MYQSVMTLCRALAQY
LLLLSKLPTS--LRVPPDKEDDILKFVVMSIEALSWHLIHDR------LPISIDLQAALDCCCLTLQQPSLWNLLASAAN
VTYACS-----LINCIKFIIEADSVAVEPGNQLLS----------------------PERKKNASKGLS--EDEVDSNMH
KMKHITAACEMVAEMVECL-----------------------------QTVLALGHHR---NSSIPAFLTPVLKNIIISL
ARLPLVNSY-TRVPPLVWK-LGW-SPKPA-GDFGTVFPEIP---VEFLQEKEIFKEFIYRINTL----------------
--------GWISRTQFEETWATLLGVLVTQPIVMDQEE-NQQEEDTERTQINVLAVQAITSLVLSAMTIPVAGNPAV---
-------------------SCLEQQPRNKALKALDTRFGRK-LSVIRGIVEQEIQAMVSK----------RDNIATHHLY
QAWDPVPSLSPVSTG-ALITHEKLLLQINTEREIGDMDYKLGQVSIHSIWLGNNITPLREEEWGEDEEDENDV-------
----------------------------PVPSSPPTSPINTRKHRAGVDIHSCSQFLLELYSQWILP-SSPNK-------
RTPVILISEVVRSLLAVSD-------LFTERNQFEMMYTTLTELRKVHPS-EDEILIQYLIPATCKAAAVLGMDKAV---
------AEPVSRLLES-TLRSTHMPSRIGALHGILYILECDLL---------DETAKQLIPIISEYLLSNLRAVAHC-VT
VHNQQHI----LVMCAAAFYLIEN----YPLDVGPEFSAGIIQMCGVMVSGSD-ESTPSIIYHCVLRGLERLLLSEQLS-
--------------------------------------------------------------------------------
--------------------------------------------------------------------------------
--------------------------------------------------------------------------------
--------------------------------------------------------------------------------
--------------------------------------------------------------------------------
---------RLDSESLVKLSVDRVNVQ-----SPHRAMAAL------------------GLMLTCMYT------GKEKVS
PS-RSTDA----------------------------------------------------------------NPAAPDSE
SVIVAMERVSV-LFDRIR--KG-FPFEARVVA-RILPQFLDDFFPP-----QDVMNKVIGEFLSNQQ-PYPQFMA--TVV
YKVFQTLHTTG-----QSSMVRDWVMLSLSNFTQRTPVAMAMWSLSCFFVSAST-----SQWISAI--LPHIISRMGKL-
---------------------------EQVDVNIFCLVAMDFYRHQID--------EELDRRAFQSVFEVVAS-------
-PGTPYHRLLTCLQNVHKVTAC----------------
>Frog
-----------------------------MATMEK---LMRAFESLKSFQQQQ---------------------------
----------------------------------------VPVVPEEPAPKAKKDPSTNKKDRVNHCLTICENIVAQS--
------LRNSPEFQKLLGIAMELFLLCSDDAESDVRMVADECLNKVVKALM-DSNLPRLQLELYKEIK------------
--------------------------------------------------------------------------------
---------------KNGAPRSLRAALWRFAELAHLVRPQKC-RPYLVNLLPCLTRISKR-HEESVQETLAA-----AIP
KIMAAFGNFANDNE---IKVLLKAFIANLKSSSPAIRRTAAGSAVSICLH-SRRTQYFYTWLL-NVLLGLLIPVEDEH--
----------------PTLLILGVLLTLRYLMPLLQQQVKDTSLKGSFG-------VTQKEADISPSAEQLIQIYELTLH
YTQH--------------RDHNVVTGALELLQQIFRTPPLD------------LLHVLTTPGSIEQVSVCRDEPYSRSRS
GSIVELIAGGSSTCSP----------------------------------------------------------------
--------------------------------------------------------------------------------
------------------------------------------------------VIARKQKGKIHLGEEEGLDDDLEGKS
DAPATPFAATKN-EVPSDVTNLSSTAPGAN-----LEGASHDIITEQPRSQ-HTLQS-DSVDISSSD------------L
ASTVTEGDEEDILSHSSSQISTVQSDTNMELNEGT--------------TQASSPVSDSSQTTTEGPDSAVTPSDSSEIV
LDAAESQYSGMQIGQLQDEEDE-GAILHQEEAGEHFGSSSLGLNQTHLLKTMGHSRQSSDSSVERFVPK-----------
-----------EEPVDPGDLENKPSRIKG-DIGHYMDKDAAPLIHCVRLLSASFLLTGQK-SVLVPDRDVRVSVKALAVS
CVGAAVALLPESFFSKLYKLPTETT-------------------------------------------------------
--------------------------------------------------------------------------------
---------------------------ESQEIQYVSDILNYINHGDPQVRGATAI--LSGTIVFSVLSKAHFEAETWIS-
------KVKANTGNTFSVQ---DCIPLLQKSLKDESSVTCKLACMAVRHCIMTLCCSTYSELGL----------------
--------------------------------------------------------------------------------
----------------------------------------------QLIIDLLTLKNSSYWLVRTELLETLAEIDFRLVN
FMEARTENLHRG------------------------------------LHYYTGLLHLQDRVLNNVIISLLGDDDARVRH
VAAASLARLVPKLFYNCDQVQADPVVAAARD----QSSIYLKLLMHETQPPSHFAVSTITRIYRGYNIQ-----------
--------------------------------------------------------------------------QSPTDI
SMENNISKVIT-AVSHALTTST--------TRALTFGCCEALCLLSITYPVCTWSIGWHCGYVTSTSAQTSRI-------
------------QVYKNRGRSFSISQQSPS-----------EEPRKSCTAGMSSMILS-LLS-SAWFPLDLSAHQDALVL
VGNLLAATAPKSLKNPWTSEEETSQGAN----------KQEEPWPALGDRAVVGMVDQLFIHLLKAINICAHVIDDITPG
--PVVKATLPSLTNPPSLSPIRRKGKERDT-------------------AEQAAVPLSPKKSGEATPASRQTEASGPAQT
SKS--IGSFYHLPSYLKLYDVLKATYANYK---------------VSLDLQNNNEKFGGFLRSALDVLSQILELATLTD-
--IAKCVEEI----LGYLKSCFSREPVMATVCVQQLLKTLFGTNLASQFEAMSS---------------NPSKCQGKAQR
LG---------SSNLRPG-LYHYCFMAPYTHFTQALADASLRNMVQADQEQDTSGWFDVLQKVSSQLKNSISNVTKH---
----RTDKNAIHNHIRLFEPLVIKALKQYTTTTSVQLQRQ-VLDLLAQLVQLRVNYCLLDSDQVFIGFVLKQFEYIEVGQ
--FRESEA--IIPNVFFFLVLLSYERYH--------------SKQIIGIPKIIQL-------------------------
-----------------------------------CDGIMASGRKAVTHAIPALQPIVHDLFVLRGANK-----------
--------------------ADAGKELETQKEVVVSMLLRLIQYHQVLEMFILVLQQCHK-------------------E
NEDK---------WKRLSRQI-----------ADVILPMLSKQQMHIDSHD---ALGVINT----------LFETLAPSA
LRPVDMLLRSMFVVPCTMAS------------------------------------------------------------
----------------------------------------------VSTVQLWISGILAILRVLISQSTEDIVLSRIQEL
SLSPKLICCQNIMNLREGDNPL-PPEVYP------EQSE-NKPAPEETFSR----------------FLLQLVGILLEDI
VYKELK------------VDLSEQQHTFYCQQLGTLLMCLIHIFKS----------------------------------
--------------------------------------------------------------------------------
------------------GTFRRITNAAMRLFKGDGS---------NGSFYTLESLNGLVES---MFPTHPSLVLLWCQF
LLLINYTNYSWWSEVHQTP--------------KRNSLSSTKLLSPHMSTESDDPDLTSKPGICNREIVRRGALILFCDY
VCQN---------LHDSEHLTWLIVNHV------------------------QDLINLSHEPP------VQDFIS-----
-AIHRNSAAS--GLFIQAIQSR-----CENLAAPTSLKKTLQCLEGI-HLSQSGAVLLLYID-KLLCTPFR-------VL
ARMVDTLACRRVEMLLAAT-------------------------PQNSISQLPMEELDRMQEYLQSSGLAQRHQ------
-----------RLYSLLDRFRMTVAPDTVSPLPSVTS--------HPLDGENQATLETLD-----------------PDK
EWYVSLVRSQCFTHSD------------------------------------SALLEGAELVNKIPAAERHSFMTS--KN
FNVSLLAPCLAL--GVHQISGE--------------------------------QDSSFFKTTLTVIVDLLSGSVEQLPA
GHQVLQPLQQ-----------VESTAYWEKLSLLFGDSS--------------------------VYCSLVALCRALAQY
LVSLPKLPAE--FHIQQEKEVDFVKFMVLCVEAISWHLVHEQ------VPLSMDLQAVIDYCCLTLQQPALWNLLASSEY
VTHACS-----LIMCVRFILEA--VAVEPGDQLLS----------------------PERRKNKMSEDSE-EDQVDSSEQ
KHVFIKTACEMMAEMVESL-----------------------------QTILVFGHQK---NRNFSAFLTPVFRNIIISL
ARLPLVNSY-TRVPPLVWK-LGW-APKWG-GEFGTSLPEIP---VEFLQEKEVFREFIYCINTL----------------
--------GWTSRTQFEETWATLLGVLVTQPMVMDQDE-NQQEEDTERTQINVLAVQAITSLVLSAMTITVAGNPAI---
-------------------SFLEQQPRNKSLKALDTRFGRK-LSVVRGIVEEEIQAMVSK----------RDNIATHHSC
QAWDPVPSLSAPTTG-TLINQERLLLQINTEREIGNMSYKLGQVSIHSVWLGNNITPLRQEELDEDEEDENEN-------
----------------------------PTPSSPPMSPINSRKHRAGVDIHSCSQFLLELYSQWILP-TNTGK-------
KTPAILISEVVRSLLTVSD-------LFTERNQFEMMYTALTELQKQHPS-EDEILNQYLVPAICKAAAVLGMDKVI---
------AEPVSRIIET-TLRSTHMPSRIGALHGILYILECDLL---------DDTAKQLIPVISDYLLSNLRGIAHC-VN
LHNQQHV----LVMCATAFYLIEN----YPLDVGPEFTSGIIQMCGVMVSGSE-ESTPSMVYHCVMRGLERLLLSEQLS-
--------------------------------------------------------------------------------
--------------------------------------------------------------------------------
--------------------------------------------------------------------------------
--------------------------------------------------------------------------------
--------------------------------------------------------------------------------
---------RLDGEALVKLSVDRVNMH-----SPHRAMTAL------------------GLMLTCMYT------GKEKIS
PG-RATEP----------------------------------------------------------------SPAAPDSE
SVIVAMERVSV-LFDRIR--KG-FPFEARVVA-RILPQFLDDFFPP-----QDVMNKVIGEFLSNQQ-PYPQFMA--TVV
YKVFQTLHATG-----QSSMVRDWVMLSLSNFTQRTPVAMAMWSLSCFFVSAST-----SKWISAI--LPHVISRMGKS-
---------------------------EPVDVNLFCLVAIDFYKHQID--------EELDRRSFQSVFELVAS-------
-PGSPYYRLLLCLQNVHKITVF----------------
>Danio
-----------------------------MATMEK---LMKAFESLKSFQQQQ---------------------------
----------------------------------------GPLSAEELVQKQKKDLATTKKDRVTHCLTICENIVAQS--
------LRTSPEFQKLLGIAMEMFLLCSDDKESDVRMVADECLNKIIKALM-DSNLPRLQLELYKEIK------------
--------------------------------------------------------------------------------
---------------KNAASRSLRAALWRFAELAHLVRPQKC-RPYLVNLLPCLTRITKR-QEETVQETLSS-----SIP
KIMAALGHFANDGE---IKMLLKAFVANLKSSSPTIRRTAASSAVSVCQH-SRRTHYFYTWLL-NVLLGLVVPVDEEH--
----------------SSHLILGVLLTLRYLMPLIQQQTPSTSLKGSFG-------LVRKEADVTPAPEQLIQVYELTLH
YTQH--------------WDHNVVTASLELLQQMFRTPPPE------------LLNVLITRGKITHTSVFREEMESRARS
GSILELIAGG-STCSP----------------------------------------------------------------
--------------------------------------------------------------------------------
------------------------------------------------------LLLRKQKGKLLSGEEEGLEDDPE-RA
EVTTGSFTASVGGDSSSEAPSSSGVSSLGTS----------DIITEQPRSSQHALQPGDSVDLSASEQGVG-------PD
TPD--EEDEEDMLSRSSSGGAGLVSTSGDLVTDANQMSAG---------AVSSSPPSESSQTTTEGPDSAVTPSDCAELV
LDGSESQYSGMQIGTLQDEEEEGSAPPP-DKPPEPFSQSALALSKPHLLEGKGHNRQSSDSSVDRFIPK-----------
-----------EEVLEPAELDNKPSRIKG-DIGHYTDPKEEPLMHCVRLLAASFLLTGQR-NGLVPDNEVRVSVKALAVS
CVGAAAALLPEAFFNLLYLQPLDGQ-------------------------------------------------------
--------------------------------------------------------------------------------
---------------------------QTEEQQYISDILQYIEHGDHQIRGATAI--LCGALIQAIQLKTRYNTETWLS-
------QIQSVTGSSVTLE---NFVPLLQRSLKDESSVTCKMACAAVRHCIMALCNGSLSELGL----------------
--------------------------------------------------------------------------------
----------------------------------------------QLLIDLLTLKNCSYWLVRTELLETLAEIDFRLIS
FLERKTEKLHKG------------------------------------EHHYTGLLRLQDRVLNDVVLYLLGDEDPRVRH
VAANTIGRLVPRLFFDCDQGQTDPVVAIARD----QSSVHLQLLMHETQPPSQFTVSTITRTYRGFNLC-----------
--------------------------------------------------------------------------QSAPDV
TVENNLSRVIT-AISHALTSST--------SRAMTFGCCEALCLLSSTFPVCNWSTGWHCGFVSSSVFHLNRS-------
------------SQYRSRGRSFSLSQSGSN-----------EEVRRSLTVGVASMVLS-LIS-SAWFPLDLSAHQAALLL
AGNLLAAVAPKCMKSPWAGEEESSPAS----------SKVEEPWPALNDRSLVVMVEQLFSHLLKILNICAHVLDDTPPG
--PAVKASLPSLANTPSLSPIRRKGKEKDM-------------------MEAGTTPMSPKKGGETNTG-RAADSTATAAV
NKSTTLGSFYHLPPYLKLYDALRATHANYK---------------VTLDLHNPNEKFGGFLRSALDVLSQLLELATLHD-
--IGKCVEEI----LGYLKSCFSREPTMATVCVQQLLKALFGTNLASQYEGASS---------------NPCRSQGKALR
LG---------SSSVRPG-LYHYCFMAPYTHFTQALADASLRNMVQAEQEQDASGWFDVMQKVSNQLRSSITNVTRH---
----RGDKNAIHNHIRLFEPLVIKALKQYTTSTSVALQRQ-VLDLLAQLVQLRVNYCLLDSDQVFIGFVLKQFEYIEVGQ
--FRDSEE--IVPNIFFFLVLLSYERYH--------------SKQIISIPKIIQL-------------------------
-----------------------------------CDGIMASGRKAVTHAIPALQPIVHDLFVLRGSNK-----------
--------------------ADAGKELETQKEVVVSMLLRLIQHHQVLEMFILVLQQCHK-------------------E
NEDK---------WKRLSRQV-----------ADIILPMIGKQQMHLDSHE---ALGVLNT----------LFESVAPSS
LRPVDMLLKSMFITPSTLAS------------------------------------------------------------
----------------------------------------------VGTVQLWVSGILAILRVLISQSTEDIILSRIQEL
SLSPYLLSCPTIRRLCDDDVP--APPETLPVAMEDANGETTRFPPEETFAR----------------FLLQLVGVLLDDI
ANKQVK------------VDMSEQQHTFYCQQLGTLLMCLIHIFKS----------------------------------
--------------------------------------------------------------------------------
------------------GMFRRITAAGSKLLKAEGG--------EGGDFYTLEGLNSLVLQ---LITTHPSLVLLWCQV
LLIINYTNYTWWSEVHQTP--------------RRHSLSSTKLLSPHSS--GEEERPEGKLTMCNREIVRRGALILFCDY
VCQN---------LHDSEHLTWLTVNHV------------------------SDLISLSHEPP------VQDLIS-----
-AVHRNSAAS--GLFIQAIQSR-----CDNLCTPVMLKKTLQCLEGI-HLSQSGALLMLYVD-KLLNTPFR-------VL
ARMVDTLACRRVEMLLAET-------------------------LQNSIAQLPLEELDRIQQYLQTSGLAQRHQ------
-----------RFFSLLDRFRATVAEDTTSPVAPITT--------HPLDGDPPPPPENVE-----------------PNK
EWYVTLVKSQCCLRGE------------------------------------GALYETTELLTKLPQSDLNAIMTC--KD
FNLCLLASCLSV--GVQRVCKD--------------------------------HGAVLFDTAQQVTFERLAGVIELLPS
PHQPLLPSSK-----------VCPD-YWQKLNQVYGEPG--------------------------FYQTVLSLCGVLSQY
LLSLSKLPSS--MHIPKDRETLITTFSTLAIEVVVWRLLQDQ------LPLSVDMQMSLSCLCLALQQPAVWTHFTSHSY
LTHTCS-----IIHCIQLLIHA--VAVGPGDQFLR----------------------PERKISEQS-----EDQVDSSDN
QR--EWHCCEIMAELVEGL-----------------------------QTVLTLGHHK---NKNIPAFLTPTLRNVIISL
ARLPLVNSY-TRIPPLVWK-LGW-SPKLS-GEFGTALPEIP---VEFLQEKDVFREFLYRINTL----------------
--------GWSSRTQFEETWATLLGVLVTQPITMDQEEETQQEEDLERTQINVLAVQAITSLVLSAMTLPTAGNPAV---
-------------------SCPEQQPRNKILKALDTRFGRK-LSVIRGMVEREIQAMVSK----------RDNIATHFPY
QAWDPVPSLSSSTAG-TLISHEKLLLQINTEREMGNMDYKLGQVSIHSVWLGNNITPLREEEWGEDEEDEADA-------
----------------------------PAPASPQLSPINSRKHRAGVDIHSCSQFLLELYSQWILPGSPSSR-------
KTPVVLISEVVRSLLAVSD-------LFTERNQFDMMFSTLTELQKVHPP-EDEILNQYLVPAICKAAAVLGMDKAI---
------AEPVCRLLES-TLRSTHLPSRIGALHGVLYVLECDLL---------DDTARQLIPTVSEYLLSNLRAIAHC-VN
LHNQQHV----LVMCAVAFYMMEN----YPLDVGSEFNAGIIQLCCMILSASE-EATPSIIYHCVLRGLERLLLSEQLS-
--------------------------------------------------------------------------------
--------------------------------------------------------------------------------
--------------------------------------------------------------------------------
--------------------------------------------------------------------------------
--------------------------------------------------------------------------------
---------RMDAETLVKLSVDRVNMP-----SPHRAMAAL------------------GLMLTCMYTGVAGEEGKEKGS
PG-RPADA----------------------------------------------------------------DPTAPDSE
SVIVAMERVSV-LFDRIR--KG-FPSEARVVA-RILPQFLDDLFPL-----QDVMNKVIGEFLSNQQ-PYPQFMA--TVV
YKVFQTLHATG-----QSSMVRDWVLLSLSNFTQRTPVAMAMWSLSCFFVSAST-----SQWISAL--LPHVISRMGKS-
---------------------------DTVDISLFCLVAMDFYRHQID--------EELDRRAFQSVFEMVAS-------
-PGSPYYQLLCCLQSIHQDTSL----------------
>Tetraodon
-----------------------------MATMEK---LMKAFESLKSFQQQQ---------------------------
----------------------------------------GPPTAEEIVQRQKKEQATTKKDRVTHCLTICENIVAQS--
------LRMSPEFQKLLGIAMETFLLCSDDSESDVRMVADECLNKIIKALM-DSNLPRLQLELYKEIK------------
--------------------------------------------------------------------------------
---------------KNGASRSLRAALWRFAELAHLIRPQKC-RPYLVNLLPCLTRITKR-QEETIQETLAA-----AMP
KIMAALGHFANDGE---IKVLLKSFVANLKSSSPTIRRTAASSAVSVCQH-SRRTSYFYTWLL-NVLLGLLVPVDEEH--
----------------HSHLILGVLLTLRYLMPLLQQQVNTISLKGSFG-------VMQKEADVQPSPEQLLQVYELTLH
YTQH--------------WDHNVVTAALELLQQTLRTPPPE------------LLHMLITAGSIQHASVFRQDAESRARS
GSILELIAGGGATCSP----------------------------------------------------------------
--------------------------------------------------------------------------------
------------------------------------------------------LLHRKHRGKMLSGEEDGLEDDPE-RA
EVATGSFTASVVGADNP---------SAAQV----------DIITEQPRSS-HTIQPGDSVDLSASSEQGGGGGGTSASD
TPESPNDNEEDMLSRSSSCGANLTPETADDATPESTTQEGGESGTLPGAGDHSLPPSDSSQTTTEGPDSAVTPSDVAELV
LDGSESQYSGMQIGTLQDEEEEGTAASSHEEAPEPFLRSALALSKPHLFESRGHNRQGSDGSVDCFTPK-----------
-----------EEPPEP-EPDNKLSRIKG-AIGHYTDRGVEPVVHCVRLLSASFLLTGQR-SGLTPDKEVRVSVKALAVS
CVGAAAALHPEAFFNSLYLEPLDGL-------------------------------------------------------
--------------------------------------------------------------------------------
---------------------------PAEEQQYISDILGFIDHGDPQIRGATAI--LCAAIIQAALSKMRYNIHSWLA-
------SVQSTTGNPLSLV---DLVPLLRKALKDESSVTCKMACSALRHCIMSLCSSTLSELGL----------------
--------------------------------------------------------------------------------
----------------------------------------------QLLVHLLALKDSSYWLVRTELLETLAEMDFRLVN
FLERKTESLHKG------------------------------------DHHHTGRLQLQERVLNDVVISLLGDDDPRVRH
VAAAAVSRLVSRLFFDCDQGQADPVVAIARD----QSSVYLQLLMHETQPPSQLTVSTITRTYRGFNLS-----------
--------------------------------------------------------------------------NNVADV
TLENNLSRVVT-AVSHAFTSST--------SRALTFGCCEALCLLAANFPICTWTTGWHCGHVSSQSSFSSRS-------
------------SLSRSRGRALSVSQSGSIPASSTTAS-ALEPERRMLTIGMANMVLS-LLS-SAWFPLDLSAHQDALLL
CGNLLAAVAPKCLRNPWAGEDESSSSSTN---TSGGTHKVEEPWAALSDRAFVAMVEQLFSHLLKVLNICAHVLDDTPPG
--PPVKATLPSLTTTPSLSPIRRKGKEKDA-------------------VDSSAAPLSPKKSSEANTG-RPTDSAGSTAI
NKSTTLGSFYHLPPYLKLYDVLKATHANFK---------------VMLDLHSTQEKFGSFLRAALDVLSQLLELATLND-
--INKCVEEI----LGYLKSCFSREPTMATVCVQQLLKTLFGTNLASQYEGVLS---------------GPSRSQGKALR
LG---------SSSLRPG-LYHYCFMAPYTHFTQALADASLRNMVQAEHEQDTSGWFDVMQKTSNLLRSNIANATRH---
----RGDKNVIHNHIRLFEPLVIKALKQYTTSTSVALQRQ-VLDLLAQLVQLRVNYCLLDSDQVFIGFVLKQFEYIEVGQ
--FRQSEA--IIPNIFFFLVLLSYERYH--------------SKQIISIPKIIQL-------------------------
-----------------------------------CDGIMASGRKAVTHAIPALQPIVHDLFVLRGSNK-----------
--------------------ADAGKELETQKEVVVSMLLRLVQYHQVLEMFILVLQQCHK-------------------E
NEDK---------WKRLSRQI-----------ADVILPMIARQQMHLDSPE---ALGVLNT----------LFETVAPSS
LRPVDMLLKSMFTTPVTMAS------------------------------------------------------------
----------------------------------------------VATVQLWVSGILAILRVLVSQSTEDIVLSRIHEL
SLSPHLLSCHTIKRLRQQNLSPSDAPACN----QEPNGEAQKSLPEETFAR----------------FLVQLVGVLLDDI
SSRHVK------------VDITEQQHTFYCQQLGTLLMCLIHVFKS----------------------------------
--------------------------------------------------------------------------------
------------------GMFRRITVAASRLLKAESG-----SGPSGAEFYPLEGLNSMVQC---LITTHPPLVLLWCQV
LLIIDYTNYSWWAEVHQTP--------------KGHSLSCTKLLSPHSSGEGEEEKPETRLAMINREIVRRGALILFCDY
VCQN---------LHDSEHLTWLIVNHV------------------------RDLIDLSHEPP------VQDFIS-----
-AVHRNSAAS--GLFIQAIQSR-----CENLNSPTMLKKTLQCLEGI-HLSQSGSLLMLYVD-KLLSTPFR-------VL
ARMVDTLACRRVEMLLAET-------------------------LQNSVAQLPLEELDRIQEYLQTSGLAQRHQ------
-----------RFYSLLDRFRATVS-DTSSPSTPVTS--------HPLDGDPPPAPELVD-----------------ADK
EWYVALVKSQCCVHGD------------------------------------VSLLETTELLTKLPPADLLSVMSC--KE
FNLRLLCPCLSL--GVQRLVRG--------------------------------QGSLLLETALHVTLEQLAGATGLLPV
PHHSFLPTSQ-----------PQL--YWKQLAEVYGDPG--------------------------FYSRVLSLCRALSQY
LLTVNQLPSS--LRIPSDKEHLITTFTCTAIEVVVWHLLQNQ------LPLSVDLQWALSCLCLALQQPCVWNKLSTPEY
NTHTCS-----LIYCLHHIILA--VAVKPGDQLLH----------------------PERTKTNAVRHSE-EDEVDSVQN
SHTFEWGACEIMAELVEGL-----------------------------QSVLSLGHHR---NGAFPAFLTPTLRNIIVSL
SRLPLVNSH-TRVPPLVWK-LGW-SPQPG-GEFGTTLPEIP---VDFLQEKDVFREFLYRINTL----------------
--------GWSNRTQFEETWATLLGVLVTQPITMDQEEETQQEEDLERTQLNVLAVQAITSLVLSAMTLPTAGNPAV---
-------------------SCLEQQPRNKSLKALETRFGRK-LAVIRGEVEREIQALVSK----------RDNVQTYHQY
HAWDPVPSLSAASPG-TLISHEKLLLQIQLERELGNMDYKLGQVSIHSVWLGNNINPLREEEWGEDEDDETDA-------
----------------------------PAATSPPLSPTNSRKHRAGVDIHSCSQFLLELYSQWLIPGSPSNR-------
KTPTILISEVVRSLLAVSD-------LFTERNQFDMMFSTLMELQKLHPP-EDEILNQYLVPAICKAAAVLGMDKAI---
------AEPVCRLLET-TLRSTHLPSRMGALHGVLYVLECDLL---------DDTAKQLIPTVSEYLLSNLRAIAHC-VN
LHNQQHV----LVMCAVAFYMMEN----YPLDVGTEFMAGVIQLCGVMVSASE-DSTPSIIYHCVLRGLERLLLSEQLS-
--------------------------------------------------------------------------------
--------------------------------------------------------------------------------
--------------------------------------------------------------------------------
--------------------------------------------------------------------------------
--------------------------------------------------------------------------------
---------RVDGEALVKLSVDRVNMP-----SPHRAMAAL------------------GLMLTCMYT------GKEKAS
PASRPASS----------------------------------------------------------------DPQVPDSE
SIIVAMERVSV-LFDRIR--KG-LPSEARVVS-RILPQFLDDFFPP-----QDVMNKVIGEFLSNQQ-PYPQFMA--TVV
YKVFQTLHATG-----QSSMVRDWVLLSLSNFTQRTPVAMAMWSLSCFFVSAST-----SQWISAL--LPHVISRMGSS-
---------------------------DVVDVNLFCLVAMDFYRHQID--------EELDRRAFQSVFETVAS-------
-PGSPYFQLLACLQAIHQ--------------------
>Fugu
-----------------------------MATMEK---LMKAFESLKSFQQQQ---------------------------
----------------------------------------GPPTAEEIVQRQKKEQATTKKDRVSHCLTICENIVAQS--
------LRTSPEFQKLLGIAMEMFLLCSDDSESDVRMVADECLNRIIKALM-DSNLPRLQLELYKEIK------------
--------------------------------------------------------------------------------
---------------KNGASRSLRAALWRFAELAHLIRPQKC-RPYLVNLLPCLTRITKR-QEETIQETLAA-----AMP
KIMAALGHFANDGE---IKMLLKSFVANLKSSSPTIRRTAASSAVSVCQH-SRRTSYFYTWLL-NVLLGLLVPVDEEH--
----------------HSHLILGVLLTLRYLMPLLQQQVNTISLKGSFG-------VMQKEADVQPAPEQLLQVYELTLH
YTQH--------------WDHNVVTAALELLQQTLRTPPPE------------LLHVLITAGSIQHASVFRQDIESRARS
GSILELIAGGGSTCSP----------------------------------------------------------------
--------------------------------------------------------------------------------
------------------------------------------------------LLHRKHRGKMLSGEEDALEDDPE-KT
DVTTGYFTA--VGADNS---------SAAQV----------DIITQQPRSSQHTIQPGDSVDLSASSEQGGRGGGASASD
TPESPND-EEDMLSRSSSCGANITPETVEDATPENPAQEGRPVGGS-GAYDHSLPPSDSSQTTTEGPDSAVTPSDVAELV
LDGSESQYSGMQIGTLQDEEDEGTATSSQEDPPDPFLRSALALSKPHLFESRGHNRQGSDSSVDRFIPK-----------
-----------DEPPEP-EPDNKMSRIKG-AIGHYTDRGAEPVVHCVRLLSASFLLTGQK-NGLTPDRDVRVSVKALAVS
CVGAAAALHPEAFFNSLYLEPLDGL-------------------------------------------------------
--------------------------------------------------------------------------------
---------------------------RAEEQQYISDVLGFIDHGDPQIRGATAI--LCAAIIQAALSKMRYNIHSWLA-
------SVQSKTGNPLSLV---DLVPLLQKALKDESSVTCKMACSAVRHCIMSLCGSTLSELGL----------------
--------------------------------------------------------------------------------
----------------------------------------------RLVVDLFALKDSSYWLVRTELLETLAEMDFRLVN
FLERKSEALHKG------------------------------------EHHYTGRLRLQERVLNDVVIQLLGDDDPRVRH
VAASAVSRLVSRLFFDCDQGQADPVVAIARD----QSSVYLQLLMHETQPPSQLTVSTITRTYRGFNLS-----------
--------------------------------------------------------------------------NNVADV
TVENNLSRVVT-AVSHAFTSST--------SRALTFGCCEALCLLAVHFPICTWTTGWHCGHISSQSSFSSR--------
-------------VGRSRGRTLSVSQSGSTPASSTTSS-AVDPERRTLTVGTANMVLS-LLS-SAWFPLDLSAHQDALLL
CGNLLAAVAPKCLRNPWAGEDDSSSSSTN---TSGGTHKMEEPWAALSDRAFVAMVEQLFSHLLKVLNICAHVLDDTPPG
--PPVKATLPSLTNTPSLSPIRRKGKDKDA-------------------VDSSSAPLSPKKGNEANTG-RPTESTGSTAV
HKSTTLGSFYHLPPYLKLYDVLKATHANFK---------------VMLDLHSNQEKFGSFLRAALDVLSQLLELATLND-
--INKCVEEI----LGYLKSCFSREPTMATVCVQQLLKTLFGTNLASQYEGFLS---------------GPSRSQGKALR
LG---------SSSLRPG-LYHYCFMAPYTHFTQALADASLRNMVQAEHEQDTSGWFDVMQKTSNQLRSNIANAARH---
----RGDKNAIHNHIRLFEPLVIKALKQYTTSTSVALQRQ-VLDLLAQLVQLRVNYCLLDSDQVFIGFVLKQFEYIEVGQ
--FRDSEA--IIPNIFFFLVLLSYERYH--------------SKQIISIPKIIQL-------------------------
-----------------------------------CDGIMASGRKAVTHAIPALQPIVHDLFVLRGSNK-----------
--------------------ADAGKELETQKEVVVSMLLRLVQYHQVLEMFILVLQQCHK-------------------E
NEDK---------WKRLSRQI-----------ADVILPMIAKQQMHLDSPE---ALGVLNT----------LFETVAPSS
LRPVDMLLKSMFTTPVTMAS------------------------------------------------------------
----------------------------------------------VATVQLWVSGILAVLRVLVSQSTEDIVLSRIHEL
SLSPHLLSCHTIKRLQQPNLSPSDQPAGDGQQNQEPNGEAQKSLPEETFAR----------------FLIQLVGVLLDDI
SSRHVK------------VDITEQQHTFYCQQLGTLLMCLIHVFKS----------------------------------
--------------------------------------------------------------------------------
------------------GMFRRITVAASRLLKGESG-----SGHSGIEFYPLEGLNSMVHC---LITTHPSLVLLWCQV
LLIIDYTNYSWWTEVHQTP--------------KGHSLSCTKLLSPHSSGEGEE-KPETRLAMINREIVRRGALILFCDY
VCQN---------LHDSEHLTWLIVNHV------------------------RDLIDLSHEPP------VQDFIS-----
-AVHRNSAAS--GLFIQAIQSR-----CDNLNSPTMLKKTLQCLEGI-HLSQSGSLLMLYVD-KLLSTPFR-------VL
ARMVDTLACRRVEMLLAET-------------------------LQNSVAQLPLEELHRIQEYLQTSGLAQRHQ------
-----------RFYSLLDRFRATVS-DTSSPSTPVTS--------HPLDGDPPPAPELVI-----------------ADK
EWYVALVKSQCCLHGD------------------------------------VSLLETTELLTKLPPADLLSVMSC--KE
FNLSLLCPCLSL--GVQRLLRG--------------------------------QGSLLLETALQVTLEQLAGATGLLPV
PHHSFIPTSH-----------PQS--HWKQLAEVYGDPG--------------------------FYSRVLSLCRALSQY
LLTVKQLPSS--LRIPSDKEHLITTFTCAATEVVVWHLLQDQ------LPLSVDLQWALSCLCLALQQPCVWNKLSTPEY
NTHTCS-----LIYCLHHIILA--VAVSPGDQLLH----------------------PERKKTKALRHSDDEDQVDSVHD
NHTLEWQACEIMAELVEGL-----------------------------QSVLSLGHHR---NTAFPAFLTPTLRNIIISL
SRLPLVNSH-TRVPPLVWK-LGW-SPQPG-GEFGTTLPEIP---VDFLQEKDVFREFLYRINTL----------------
--------GWSNRTQFEETWATLLGVLVTQPITMDQEEETQQEEDLERTQLNVLAVQAITSLVLSAMTLPTAGNPAV---
-------------------SCLEQQPRNKSLKALETRFGRK-LAVIRGEVEREIQALVSK----------RDNVHTYHPY
HAWDPVPSLSAASPG-TLISHEKLLLQINTERELGNMDYKLGQVSIHSVWLGNNITPLREEEWGEDEDDEADP-------
----------------------------PAPTSPPLSPINSRKHRAGVDIHSCSQFLLELYSQWVIPGSPSNR-------
KTPTILISEVVRSLLAVSD-------LFTERNQFDMMFSTLMELQKLHPP-EDEILNQYLVPAICKAAAVLGMDKAI---
------AEPVCRLLET-TLRSTHLPSRMGALHGVLYVLECDLL---------DDTAKQLIPTVSEYLLSNLRAIAHC-VN
LHNQQHV----LVMCAVAFYMMEN----YPLDVGTEFMAGIIQLCGVMVSASE-DSTPSIIYHCVLRGLERLLLSEQLS-
--------------------------------------------------------------------------------
--------------------------------------------------------------------------------
--------------------------------------------------------------------------------
--------------------------------------------------------------------------------
--------------------------------------------------------------------------------
---------RVDGEALVKLSVDRVNMP-----SPHRAMAAL------------------GLMLTCMYT------GKEKAS
PAARSAHS----------------------------------------------------------------DPQVPDSE
SIIVAMERVSV-LFDRIR--KG-LPSEARVVA-RILPQFLDDFFPP-----QDIMNKVIGEFLSNQQ-PYPQFMA--TVV
YKVFQTLHATG-----QSSMVRDWVLLSLSNFTQRTPVAMAMWSLSCFFVSAST-----SQWISAL--LPHVISRMGSS-
---------------------------DVVDVNLFCLVAMDFYRHQID--------EELDRRAFQSVFETVAS-------
-PGSPYFQLLACLQSIHQDKSL----------------
>Gasterosteus
-----------------------------MATMEK---LMKAFESLKSFQQQQ---------------------------
----------------------------------------GPPTAEELVQRQKKEQATTKKDRVTHCLTICENIVAQS--
------LRTSPEFQKLLGIAMEMFLLCSDDSESDVRMVADECLNKIIKALM-DSNLPRLQLELYKEIK------------
--------------------------------------------------------------------------------
---------------KNGASRSLRAALWRFAELAHLIRPQKC-RPYLVNLLPCLSRITKR-QEETVQETLAA-----AMP
KIMGALGHFANDGE---IKVLLKSFVANLKSSSPTIRRTAASSAVSVCQH-SRRTSYFYTWLL-NVLLGLLVPVDEEH--
----------------PSHLILGVLLTLRYLMPLLQQQVNTTSLKGSFG-------VMRKEADVQPTPEQLLQVYELTLH
YTQH--------------WDHNVVTAALELLQQMFRTPPPE------------LLHMLITAGSILHGTVFRQDAESRARS
SSIRELIAGGGSSCSP----------------------------------------------------------------
--------------------------------------------------------------------------------
------------------------------------------------------LVLRKPRGKMLSGEEDGLDDDAE-RT
EVTTGVFTAAVVGADGS---------SAAQV----------DIITEQPRSSQHTLQPGDSVDLSASSEQCG--GGASASD
TPESPNDNEEEMLSRSSSGGANVTPETADYTTPETEGGPLGEGATLLGANDRSMPPSDSSQTTTEGPDSAVTPSDVAELV
LDGSESQYSGMQIGTLQDEEDEGAAPSSQEEPSDPIMQSALALSKPHLFDGRGHNRQGSDSSVDRLIPK-----------
-----------DEPAEP-EPDNKPSRIKG-PIGHYTDQGVEPLVHCVRLLAASFLLTGQK-NGLTPDKEVRVSVKALAVS
CVGAAAALHPEAFFNSLYLEPLDGV-------------------------------------------------------
--------------------------------------------------------------------------------
---------------------------PVEEQQYISDMLGLIDHGDPQIRGATAI--LCAAIIQAALTKTRYNIHTWLA-
------SVQSATGNPLSLV---DLVPLLQRTLRDESSVTCKMACSAVRHCIMTVCSSTLSELGL----------------
--------------------------------------------------------------------------------
----------------------------------------------QLVINLLPLRDSSYWLVRTELLETLAELDFRLIN
FLERKTDTLHKG------------------------------------DHHYTGRLRLQDRVLNDVVIRLLGDDDPRVRH
VAASAVSRLVSRLFYDCDQGQVDPVVAIARD----QSSVYLQLLMHETQPPSQFTVSTITRTYRGYNLS-----------
--------------------------------------------------------------------------NNVSDV
TIENNLSRVVT-AVSHAFTSSS--------SRALTFGCCEALCLLATNFPVCTWSTGWHCGYVSSSSSFSSRS-------
------------SLSRSRGRALSVSQPSSSPASSTTSSSAPDNERRTLTVGMANMVLS-LLS-SAWFPLDLSSHQDALLL
CGNLLAAVAPKCMRNPWAGEDEGSGGSAN---PN--PNKMEEPWAGLSERSLVAIVEQLFSHLLKILNICAHVLDDIPPG
--PAVKATLPSLSNTPSLSPIRRKGKEKDA-------------------AEPSAAPMSPKKSNEVNTG-RPADGTGLTAV
NKSTTFGNFYHLPPYLKLYDVLKATHANFK---------------VTLDLHSSQEKFGGFLRATLDVLSQLLELATLHD-
--ISKCVEEI----LGYLKSCFCREPTMATVCVQQLLKTLFGTNLASQCEGISS---------------GPSRSQGKALR
LG---------SSSLRPG-LYHYCFMAPYTHFTQALADASLRNMVQAEQEQDTSGWFDVMQKASNQLRSNIANATRN---
----RGDKNAIHNHIRLFEPLVIKALKQYTTSTSVALQRQ-VLDLLAQLVQLRVNYCLLDSDQVFIGFVLKQFEYIEVGQ
--FRDSEA--IIPNIFFFLVLLSYERYH--------------SKQIISIPKIIQL-------------------------
-----------------------------------CDGIMASGRKAVTHAIPALQPIVHDLFVLRGSNK-----------
--------------------ADAGKELDTQKEVVVSMLLRLVQHHQVLEMFILVLQQCHK-------------------E
NEDK---------WKRLSRQI-----------ADVILPMIAKQQMHLDSPE---ALGVLNT----------LFETVAPSS
LRPVDMLLKSMFTTPVTMAS------------------------------------------------------------
----------------------------------------------VSTVQLWVSGILAVLRVLVSQSTEDIVLSRVHEL
SLSPHLLSCHTIRRLHQPSFSPSDPPAADTLLNQEPFGEAQRAPPEDTFAR----------------FLLQLVGVLLDDI
SSRQVK------------VDITEQQHTFYCQQLGTLLMCLIHVFKS----------------------------------
--------------------------------------------------------------------------------
------------------GMFRRITAAASRLLKGEGGSAVGPTGTEAALFYPLEGLNSLVQC---LITTHPSLVLLWCQV
LLIIDYTNYSWWTEVHQTP--------------RGHSLSCTKLLSPHSSGDGEDDKPEERLAMVNREIVRRGALILFCDY
VCQN---------LHDSEHLTWLIVNHV------------------------RDLISLSHEPP------VQDFIS-----
-AVHRNSAAS--GLFIQAIQSR-----CDNLNTPTMLKKTLQCLEGI-HLSQSGSLLMLYVD-KLLGTPFR-------VL
ARMVDTLACRRVEMLLAET-------------------------LQNSVAQLPVEELDRIQEYLQTSGLAQRHQ------
-----------RFYSLLDRFRATVA-DTSSPTPPVTS--------HPLDGDPPPAPELVS-----------------ADK
EWYVALVKSQCCFRGD------------------------------------VSLLEMTELLTKLPPTDLLDIMSC--KE
FNLSLLCPCLSM--GMQRLARG--------------------------------QGALLLETALQVTLERLAGVTGSLPV
PHQSFLPPAQ-----------SQP--YWNQLAAVYDEPG--------------------------FYPGVLSLCRALSQY
LLSVSQLPSS--LHIPFDKEHLITTFTCTAAEVVAWRLLQNQ------LPLSVDLQWALSCLCLALQQPCVWNKLSTPEY
ATHTCS-----LIYCLHLIIVA--VAVSPGDQLLY----------------------PEKKKTKAESDAE-ADEVDSAHA
DNTLERKACDIMAELVEGL-----------------------------QSILALGHHR---NSVFPAFLTPTLRNIVISL
SRLPLVNCY-TRVPPLVWK-LGW-SPQPG-GEYGTTLPEIP---VDFLQEKDVFREFLYRINTL----------------
--------GWSSRTQFEETWATLLGVLVTQPITMDQEEETQQEEDLERTQLNVLAVQAITSLVLSAMTLPTAGNPAV---
-------------------SCLEQQPRNKSLKALETRFGRK-LAMIRGEVEREIQALVSK----------RDNVHTHHPY
HAWDPVPSLSAASAAGTLISHEKLLLQINTERELGNMDYKLGQVSIHSVWLGNNITPLREEEWGEDEEDEADT-------
----------------------------PAPISPPVSPINSRKHRAGVDIHSCSQFLLELYSQWLIPGSPSNR-------
KTPTILVSEVVRSLLAVSD-------LFTERNQFEMMFSTLMELQKLHPP-EDEILNQYLVPAICKAAAVLGMDKAI---
------AEPVCRLLET-TLRSTHLPSRMGALHGVLYVLECDLL---------DETAKQLIPAVSEYLLSNLRAIAHC-VN
LHNQQHV----LVMCAVAFYMMEN----YPLDVGAEFMAGIIQLCGVMVSASE-DSTPSVIYHCVLRGLERLLLSEQLS-
--------------------------------------------------------------------------------
--------------------------------------------------------------------------------
--------------------------------------------------------------------------------
--------------------------------------------------------------------------------
--------------------------------------------------------------------------------
---------RVDGEALVKLSVDRVNMP-----SPHRAMAAL------------------GLMLTCMYT------GKEKAS
PASRPAHS----------------------------------------------------------------DPQAPDSE
SVIVAMERVSV-LFDRIR--KG-LPSEARVVS-RILPQFLDDFFPP-----QDVMNKVIGEFLSNQQ-PYPQFMA--AVV
YKVFQTLHATG-----QSSMVRDWVLLSLSNFTQRTPVAMAMWSLSCFFVSAST-----SQWISAL--LPHVISRMGSS-
---------------------------EVVDVNLFCLVAMDFYRHQID--------EELDRRAFQSVFETVAS-------
-PGSPYYQLLGCLQSIHQDTSL----------------
>Branchiostoma
-----------------------------MATTEK---LLKAFESLKAFQQGNVTGEETSTASQTAPVGQM---------
--------------------------------------------------SKKKELAVGKKDRVAHLVTIADAMCASNF-
-------RTMAEFPKFLGISMEMFLASCDDKESDVRMVADECLNRTVKMLL-ETNLGRLQVELYKEIK------------
--------------------------------------------------------------------------------
---------------KNGPARSLRAALWRFAELSHLIRPQKC-RPYVVNLLPCFNRICRR-QEDAVQETLAN-----SLK
KTFPVLGSFTNDAE---IKVLLKTFLPNLRSASAVTRRTAASSLVTFCQH-SRKPRHFFCWLL-TVLLGMVIPIQEDR--
----------------KSHTLLGVLLCLRHLVPHLATLQEL-EDDSLKGSFGV----TKKDPELSVSTEQLVQIFELVLH
YSQH--------------TDHNVVTASLETFQQLLRTPPPG------------LLPVLTRPGTITQSSIFKE--GGQQ--
RVGSSSQLSA----------------------------------------------------------------------
--------------------------------------------------------------------------------
------------------------------AG-----------VGEEDSGMEDDRSEVSSTATDDLPPIVKLNLDPTMQS
MEQSASTADLET---------------------------------------LDSSAAESSGIGLLQTGGEGGIFNALEKA
DSLPDTP-TTTEFPGNVQDFPEHAA-----------------------------ADDVIINADGGSYSNVEIGSVTVEDD
FPS--------ESEVSPVGIVA-------EFIKTHQRADSNV----------S---AGSQEAERQ--------VSEEV--
-------SLAEEGSEVTASTER--MMGD---VGLYTDEE-VPLIYCTRLLCSSFLLTGHE-KGLIRDREVRVSVKALSLG
CLAAIFNLHPRALSIKLFRPSQD---------------------------------------------------------
--------------------------------------------------------------------------------
-----------------------TQGP--ESRQLVRDILLFSNHGDPQPKGNTAV--LVGNFIHSALTEARLKYDLWIQ-
---AICE-E-QGTPPVLLE---SLVSCLQTCLTDQASVTCRMACVALKTCLVTLLQSSSGDLGL----------------
--------------------------------------------------------------------------------
----------------------------------------------RLVLATLGQRDTSYWLGKVELLELLSQVDFKLVK
YLEDSFPYMRKGDHSY---------------------------------LGAM---NCQQRLLEDIVLHLMGDDDYRVRH
AATAALVRLVPRLFYPVDHPQHDPVVASAKE----YSSAHLEQEGHQQSE----E-PYRPPPC---------TMWGYET-
S--------------------------------------------------------------------------GLVSA
SLESSLSRVVS-AIMRRLNSST--------SKSLTFGCLHALCQLSQQFPVCQYTTAWCCVGITT-FTPKDS--SGRANL
PRPGSRSRSLNGSLTSSMTSSLTSSITSTSSISSVSSQLSMEESITGSGGGPLPMVLS-LLL-SSWLPLDLAAHQDALLL
AGNLLAGAASRSLKA--PYDEEKPTGKD---GVKEGGKEEEDGWHALQDRNLVPLAQQLLSHLARVVNVCSHVIEQVIPG
-PP-AKTALPSLPNAPSLSPIKRKPKGKDG-------VDQGSATA----SPSKSSAK--KGSD----AGLP--TEKEPDR
PNKSNIGTFWQLPGYMKLYSVLKGAYSNYK---------------VSLDP-SATEKFLGLLKTVLNVLSQVLEIATFID-
--ISKYVEEL----LSYLKSTVAMEPTSTIQCVEQLLKALFGTNLASQWDGSQT---AE-----------TSRKPGKATR
L----------SSNMKPG-LYHYCFTAPYTQFTQSLAAASFRTSQAEGEEGG--GILSWFK--HRS-SDKKVSPAIA-KL
VK--GDK-TPIHNYIRLFEPLVIKSLKLYTVTSSVTLQRQ-VLHLLAQLVQLRVNYCLLDSDQIFIGFVIKQFEYIEAGQ
--IRGSET--LIPPIFHFLVLLSYERYH--------------SKSIIVMPRIIQL-------------------------
-----------------------------------CDGVMASGQKATNHAIPALQPIVHDLFVLRGNS-----K------
--------------------ADQGKELDTQREVVVSMLVRLIHYPEVLEMLTIVLQQCHK-------------------E
SEDR---------WKKLSRQV-----------VDMVLPMLARQQICLSTPS---ALNTLHG----------LFESVTPSS
LRPLDMLLKTLFSP-PTDLT------------------------------------------------------------
---------------------------------------------SPDSFLRWSSMVLSVLRVLISQSKEEVIMARLQEL
GLSANIFTNNVIYRAKGRAADL--DGDVP-----------FEEVPEEALAR----------------FLLQVIGALAEEI
AFRSN-----------TSVLQR-EGCHSLAQQLAHLLLYVTYILKS----------------------------------
--------------------------------------------------------------------------------
------------------GLFRKVLSAAMALPEESP----------TEAYYSVEQLNLFFQD--MV-PSHPTLVLQWCQI
LLLLNFNELSWWSEIMQT---------PKRSIKASSSGNSSGGGGKKGKARTPDEVSNKSAICCSEEVVRRGGLILFCDY
VC--------QNLS-DVEHMTWVIINHV------------------------KDLIELAQE-PP-----VQDFIS-----
-AIHRNSAAS--GLFLQAIHSR-----CEKLSKPCIVKSMLGCLEGI-HLTQSGTLLTLLID-KFLQTPHH-------AL
ARMCDSLACRRVEMILAQ-------------------------PVEDSRTQFPVEDVEKLQVFMRESGLALRHQ------
-----------RLASLLARFKAVITQQAVPPVEPPPS-------SHPLDAAN-INIASL-------------S----INK
DLYVATVQDHCF--RR-----------------------------------DSNAQECALMLSKLDYSDVLTIMMT--KE
FHMRLLEDSISV--GLQQSRVSSTLAYGTADVL------NRTKGL------KLGKAHHLLRASCITLLRHVSNVVNILPS
PRQLVSPGNHHPGNHASRSRTPPREKYRLKMDMLFADRE--------------------------WRHSVFHMAAGLTVY
LLSLNKIPEQ--CQIPEDSFTDICRFSILVLEILCYLLYKGR------TPSSQQLQTAVECCCAVLKNPQLFTIMVATE-
HANLV-------TTAVGSIHQVVKSVCISAGEK------LS---------------PVS-LP-EPGESK-NIS-EDQQ--
---RALLACRQMCELLQCL-----------------------------TTTLSPGNT-----RLPQFL-AAPLRNVVLNL
ARLPLVNSY-ARTPPIVWK-MGW-GASPG-GETGTKLPELP-FD--FLQEREVLKDFIFRINAV----------------
--------GWTSRTQFEETWAGLLGILSALPITVPAE---SREEEIEKTQANVLAVRTITALVLDSTLHPQPGNPAS---
-------------------SVYEYRPRSKPPSYINTRWGRK-LAQVRHIVEKEIMAIAA----------ERCDLCSHHQY
FNMQE---------QQLLEGEGGLYSADVH-RTLGFTDYGLGHVSIKSIWSDNHILN-Q---TPDTDEEPDFP-------
-----DQEGGGTAQPL--V-------------------TTPRRFRGGLDIHSCLQFLVELYSQWMEPTAM--------PR
-TPVPLLCEVAKSILLISD-------LFTELRQYEWMFDSLLELNKIHPV-EDEILLQYVVPGVCKAGAVMGM-EGP---
-----VAERVSKLLES-SLKSTHLPTKVGSVYGSLYILEAGP---------SEATK-LLVPVLQDYLSKNIPPTAQC-CI
VHVEPHV----LAMWATAFYLME---HYQEDLKESDFKSTMLQAAITTASGSE-EVTPAPVYHAVVRGLERLLV-TRVL-
--------------------------------------------------------------------------------
--------------------------------------------------------------------------------
--------------------------------------------------------------------------------
--------------------------------------------------------------------------------
--------------------------------------------------------------------------------
--------TGHEAEPLVKLSVDRLCL-----PSPPRAIAAL------------------GLMLTCMYT------GKDAGD
TGSDTGS-------------------------------------------------------------GR-SEPTTPDNE
SLIVAMERVTV-LFDRIR--KG-FPCEARVVA-RILPTFLDDFFPA-----QDIMNKVIGEFLSSQQ-PHPQLMA--KVL
CDVFHNLHERD-----QQQVVRDWVMLSLSNFTQRTPVAMATWSLTCFFLSAST-----NPWVCAL--LPHVIGRMGL--
----------------------MET--VDRKL--FCITALDFYKNQIT-E-------ELDRRAFESIFQAA-----SSSA
-PDGPYLQLIQLIH------------------------
>Capitella
-----------------------------MAGLEK---LVKAFEALKIFQPGITGEETSA--------------------
--------------------------------------------------KRKDQAPLSKKEKIANCNTVAECICAQNL-
-------RNQADFPKFLGIAMETFLSLCDDAESDIRMVADECLNKTIKTLM-ESSLGRLQVELYKEIK------------
--------------------------------------------------------------------------------
---------------KNGSTRSLRAALWRFADMCHLIRPQKC-RPYVVNLLPCLARICRR-PEESLQETLVV-----AMA
KMAPVLLGFTNDPE---TKVLLKAFLPNIRASSAAMRRTAASSLTLICQN-SRKPPVFAEWLL-QGLLDHLMPLEAER--
----------------DVHGILGALLALRTAFPMLASFVDE-PTHGAKNNLGQ----KPKEADVTISSEQLLQMYELLLH
YSGH--------------SDHNVVTASLETLHVLLKQAPRS------------LLNILLHKGTIKSTSIFGKD-------
--------------------------------------------------------------------------------
--------------------------------------------------------------------------------
------------------------------------------------N-DSRGHHRLPS--LGDVSALE------AELS
PEEEED------------VAADDSVIEHLEKADN----HTELAEEALEGN------------------------------
------DLVDQAIME-EAMARS--------------------------------LT-----GDDAEYTSMEIGCVVPDKS
T----MS----QSSSMDTLSE----------VPQSTLEDSSL----------K---QVASAAVMP--------SD-----
-------DPSPVADVDAKDPLR---QGN---IGSFDDGE-VPLVYCVRWLCSRFLFTGFP-RGLTLDRHVRVSVKALALN
CVGCAVAVCPSVFLMKLQLEQPD---------------------------------------------------------
--------------------------------------------------------------------------------
-----------------------LG----SELQDVSDVLLYASHLDPQLKGNTAQ--IVGNLIQAVLQQSRGHFHRWVA-
---SNSDQG-LSPGSLTLD---DLVSLLIAILEDDSAVASRCALLSFRGCFSEILHSSQSHLAL----------------
--------------------------------------------------------------------------------
----------------------------------------------KIMLSVVAVRENPYWLVKVALLDLLAEVDYRVLH
YVEMTNPEFARGQHNF---------------------------------IGNL---SIQEHVIQDVLLSLLADPDTRPKH
WSSCCLSCSTQWTMRFMTRSFGVRGTRLPVT----LSPCCMSGQDPFSRL----FTVWSSPTTRPVPSHPTQCWRLLCRE
W--------------------------------------------------------------------------SLCLC
THSCSLTPSISLPAAVALSVSC--------RRRFPLPCTPFPGVVQPSPRTPTNPLPFPG--------------------
QPSPRG------ALEGEI-SWLAFRVVTYDLLYSGGSHVPWEELPSGSAGGPLPIILA-ILT-SSPLAFDFAAHQDALQF
AGNLFSGAAYKCLRS--T---EEAPP----------EQAEEQHWSCLSDRLLVPQAEALLTHLARMLNLCAHVVDEVSPG
-PPQSKPSLPSLPNAPSLSPIKRKAKGAKDEPAAAQ-----LSAA----PAAAAPQ-----------LQKP-SKDSATEK
NKKDSLGAFHHMPHYMHLYDMLKGAYSNYK---------------ISLDL-SNSEKFHCLLKTTLMVLSQLLEVACLPS-
--IARHTEDL----LSCLQSSLTREPTASVLCVQQLLKALFGTNLASQWAPSQS---LL-----------SSRKPGKATR
L---------T-SAMKPG-LYHSCITTPYTQFTHCLASATF----RSHGDQD--DSFSLLSWLRKRA-EKKIPAILK-PG
SK--TDK-TAVASYIRLFEPLVIRALKQYTVTSCLSLQQQ-VLNLLAQLVQLRVNYCLLDSDQIFIGFVIKQFEFIEEGQ
--IRNSEV--LIPAIFHFLVLLSYERYH--------------SKSIIGMPKVIQL-------------------------
-----------------------------------CDGIMASGLDPTLHALPALQCIVHDLFALRGAT---H-K------
--------------------SDLGRDLETQREVVVSMLLRVVQHPQVLELLIIVLHQCRK-------------------E
SEDK---------WKRLSRQV-----------TDMVLPLLTRQMIDLGCQE---ALDVVHR----------LFETVATSV
FRPVDVLLKSLFSA-PSALS------------------------------------------------------------
---------------------------------------------SVHSLQQWLCLVLVVLRVIIAQSKEEVVLGRLQEL
GLGLTVLASNPTEPAEEKLATTGVVGA----------------TPEETIARYPGASAHRYNLMFASRFLLQVIGITAVEL
NSRLAD--------LATTSSER-EKCDFLAQELGHLLLYVTHMFQS----------------------------------
--------------------------------------------------------------------------------
------------------GIYRRVATTAMKLIQKET----------GCHFLSVQQINSAFKE--LS-WKQPTLSLQWCNV
LILLNYEDANWWGSVMQT---------PHKYKMSSSPSLS-NYNA----AESFSPVSQK---SINKEVLRRGGLIVFCDY
IC--------ENLS-DAEHMTSVIINHV------------------------NDLIDLSHE-PP-----VQDFIS-----
-AIHRNSAAS--GLFIQAIHSR-----CDNFSKPVLAKKTLQCLEAI-HLSQSGAVLTLLID-KFLHSHHL-------TV
ARYCDSIACRRVEMLLSE----------------T-------SSVHETCAQLPLEDLEKLLKFMKLHGLLRRHA------
-----------RLASLLNKLRNNVCPESLLTLSPE-K-------THPLALAN-SNTAEL-------------S----LNK
EWFLSIVRDQCF--TA-----------------------------------QSSQRECAELLQHLDYSNILSIIMA--KE
CKLSVLEECIAL--GSQRSLHQHALTL-EGGAL------EGTSPT------HMQSLDPLFRAAQITMFRHINGIINLLPV
PHQVLS---------FDVNVSSEQEQYNEKIDDHMSDAT--------------------------WADDTQQLAAALLRY
LVVLPEFPWK--PEIPEESLRDIA--------------------------------------------------------
---------------------------FPPKL------------------------------------P-CLP-TDSH--
---FAIRACDQISELLFCL-----------------------------ESHLKPHSL---APSLPTFL-VAPLRNVIISL
ARMPLVNSY-ARTPPLVWK-MGW-MPSPL-GELKTRLPPLP-LE--YLQEKDVLREFIFRINIL----------------
--------GWTSRQQFEETWMSLLGVLNPVSTLSEEELHLSPEEDIDRTQCAVLALRCISALIVHSTLSPHSGDPSS---
-------------------SLPEKHPRDKPIAFLLTRAGKK-LAKVRGRVEKEMRYLCH----------QRSVSLTFCPI
NININYRTDLDSHHWYSQSQQNDLLVQNMD-VEPGGTEFGLGQISIESIWSLVGMLKPN---QLLRDPSTEST-------
-----EAAPSSDDPPS--LPPPVVHPPPARMTSPTEV-KERSSKVSGLDIHSCLQFLLELYGTILSPGSS--------PR
-IPLMQLNEALKSVIALSD-------MFTERQQYEWLLVTLLDLQRSHPA-EDELLLQHLIVGACKAGAVIGM-DAG---
-----TGERVLRLMEL-SLRSTHLPTKVAGLFASIYLMEAGS---------ADLMP-EVVTSLTHSLTKTLGSITQLHTT
IHSQQHV----LVMWTVTFYLLE---NHFDFVKDVEFLPRVMQLAMTTVSASE-EATPLLIYLAVMRGLERLLL-IGIL-
--------------------------------------------------------------------------------
--------------------------------------------------------------------------------
--------------------------------------------------------------------------------
--------------------------------------------------------------------------------
--------------------------------------------------------------------------------
--------PKTDIESLIKLSMDRLCL-----PSPCRSLAGL------------------GLMLTCMYS------GESHTK
VHSERYILITGR---------------------------------------------LTEQWLLNEDGSD-VDALDRDPE
GLIVAMERVTL-LFDRAR--KG-FPYEARVIT-SLLPTFLTDFFPP-----NDIMNKVIGEFLSNQQ-PHPQLMA--RVV
FQVFEQLLERR-----QIALVQDWVMLSLSNFTQRTPVAMAIWSLTCFFISASS-----NPWLRSL--LVHVLGRIGH--
----------------------MDS--VDRKI--FVISALEFRS-QLE-N-------EAQQRSFVSTFQNV-----AS--
-LDAAYSDLLSSCNS-----TIN---------------
>Lottia
-----------------------------MATIEK---LIKAFEALKVLKKDQP--------------------------
---------------------------------------------------------PSKKDKMVNCNVVADCICAVNM-
-------RSVPDFPKFLGIAVEAFLTLCDDPESDIRMVADECLNRTIKTLL-ETNLGRLQVELYKEIK------------
--------------------------------------------------------------------------------
---------------KNGSSRTLRGALWRFADMCHLIRPLKC-RPYIVNLLPCLTRISQR-DEEAIQDTLGT-----SMS
KICPALMGFANDGE---VKSLLKTFLPNLKSTVAVCRRTTATSLVLICQY-SRNPLSFFNYLI-SVLLDMVLPVDTEH--
----------------DIYTLLGVILCLRHAIPIMNDSDEKDQGMKGSFGL------IQKDKEEGVSAMQVEKIFQLLLF
YTSH--------------NDHNVVTASLEALQQLLRHPPDS------------LRSILLVRGSITRTHIFQQD-------
--------------------------------------------------------------------------------
--------------------------------------------------------------------------------
------------------------------------------------FIDERERMRVESKYLNNVCISG------SAEL
TSEADDQGLEE--DADVSMATDQPIKSNTATLDD----DIEQVEE-LQLD------------------------------
------SSSQEVIKDSEENAKK--------------------------------LDPSVHFTTDDDYSNLDIGDLNDDKS
EKT-TLT----RSGSQDTLLS----------VKSLSPRHSAS----------VRTLELAQDLNGN--------PEYVET-
-----SEPPSPMPISDSNKIFQ--QLAD---FGNITDNE-MPLVYCVRLLCRRFLLSGNK-LELILDKFVRVSSKSLALA
CISSAIFMCPKIFLLKLLPTD-----------------------------------------------------------
--------------------------------------------------------------------------------
-----------------------------SGDQDIREVTLYASHPDPVLKGQTGI--VISSFIKAVLIEGRGDFNKWLK-
---MNSPA---DIGEICID---NLVNTIIHVIEDESSVATRQGLIALQSCLASLLDSCHGGLGL----------------
--------------------------------------------------------------------------------
----------------------------------------------QVLLDILEVRNNPYWLVKVELLEVLSSINFKVVS
YLENICEEIEIGKHHY---------------------------------LGKL---EIQEYYIQNVVLCLLADEDIRVRH
AAANSLVRLIPNLFYPVDHPQHDPVTACAQD----LTNRVFTSLSHQLIE-------DLPPLVQGLVKPYHY-----SPN
I--------------------------------------------------------------------------K-VNS
TVESCLSRIIQ-QLLHQIHISQ--------SRH---GCCHALCLLCEEYTVTCYSSCWGCGSATH-ISTKDQ--TRSGSM
KRPPSR------SLSSSR-FVFFHQELKYKNCYFQETDCFVKFKLTRNFSGPLPMILS-ILM-SSPVGLDISSHQDVLQL
TGNLMAGSAFKCLRS--S---EELASL--------TSTGDAGKWAAISDIQLGTLIDQLLVHVARLLNCFLHVFEEQIPG
-PPQVKPSLPSLPNAPSLSPVKRKVKGGDKETASPSGKDNITDSK----TPQKTPQK--GNNSLNCSFSKY-TKEGEKEK
GKKEGLGTFYNLPQYMKLFDVLKGAYSNYK---------------TSLDL-SNCDKFCNLLKVTLSVLSQILEVTTLTD-
--IGKYAEEF----LTYFRCTFSIEPTFTVLCVQQLLKALFGTNIGNQWEPGSV--SNY-----------TSQRVKHLTR
Q---------AGSNFKPG-LYQCCLNQPYTTLTKSLDGTSTTNTDKTQSESD--TSQSNLLWLKKRV-ERKVPSILK-PG
SK--VDK-SAIASYIRLFEPLVIKALKQYTVTSSLDLQHQ-VLNLLAQLVQLRVNYCLLDSDQIFIGFVLKQFEYIEEGQ
--IRESEM--LIPHIFRFLVMLSYERFP--------------GKVIIDMNGVIHR-------------------------
-----------------------------------CDGIMASGLQPTKHAIPALRPIVYDLFLLRGNM-----K------
--------------------SEVGKEQDTQREVVVSMLLRLINYHQALEMFVIVLQQCHR-------------------E
SEEK---------WKKLSRQV-----------MDLVLPALSKQQINLDCSK---ALDVLHL----------LFECVSPSV
FRPVDILLKTLLAP-PTDIS------------------------------------------------------------
---------------------------------------------CVEGLQRWLCLVLAILRIIISQSKEETVLSRLLEL
NLPLC-LTRDLTKTNADPVALTDI-------------------NPEETCAW----------------FLLQAVGLCSEIL
NRESA-----------IVSTSQ-TFCDFTVEQMSHLLLYITYMFQS----------------------------------
--------------------------------------------------------------------------------
--------------------YRRVATAAMRLINRDR----------PSCLYSVKEINNFLLG--VS-TKWPTLALHWSNI
LILLNYDNQKLWTQILQT---------PQKYHIVTPGRYS-SGNL---------ESSRRLLQCCNLEILRRGGLILYCDY
VV--------ENLS-NAEHMTWLTVNHV------------------------SDLIELTSE-SP-----VQDFIS-----
-AIHRNPAAS--SMFVQAINSR-----CDHVTRPSLIRKTLKSLEAI-HLSQSGSLLQLLID-KFLNTHQL-------SI
ARMCDTIACRRVEMLLIE-------------------------SEEESKKQLPLEDLDKLLQFMKTNNLIKRHA------
-----------RLASLLSKFRTLFNAEKELNLSPE-R-------THPLVFTS-TNITDI-------------N----IDK
DFYSDVVKDQCF--SI-----------------------------------DPNVRECAFLLQRLDYADVLAITMT--KE
FCLEILDECIAL--GAYRSIVRYNRDK-E--AL------P-ISFK------PEPTIDELFQAAQLTMFRHINNIINHLPV
PHQLLS---------YSRRQTSKNLRYYDRIEDLFTDCT--------------------------WFDMNFDLATSLCQE
MA------------LTVERLKDVL--------------------------------------------------------
---------------------------G--------------------------------------------E-NESS--
---HLITSCDQISELLQCL-----------------------------KTRLRPKSSE--TQKLPEFL-SSPIRNIVTGL
ARLPLVNSY-ARVPPLVWK-LGW-SPSPT-GNLKTHLPPVP-VD--YLQEKDVLEEFVFRINTL----------------
--------GWISRHQFEETWMSLLGVLNPVTLTDTH--QLSAEEEIERTQGMVLAVKDITSLLLQSTLIPQAGNPSN---
-------------------SVYEIRPRDKPLAFLHTRCGKK-LGMIRSLIEQEIYSLCC----------NKSDSQTHHT-
-HSKPTRRLD-------SYFCEDLFEDNLE-RRIGSEDFSLGQISLEGIWSVVGSLETT---HSESD-TTDST-------
-----ES-PQHD------LKKPHI------ALSNMES-KDRSMSINGLDINSCLQFISELYGPWLSTESS--------NK
-PPLMLLNAVVKSMLSLSD-------LFMEREQFEMMLDTFLDLYKQHPS-EDEILLQYLIVGICKASAVIGV-DSS---
-----TAERLIKVIDS-GLKSTHLPSKVSSLHGILYILETST---------SDLTK-TLLPIITEFLTRHLSAVSNA--Y
ITSDQFL----LTMWATAFYILE---NYHEDIKDGDFPSRIMQLVVSTASYNE-DSVSTSVFLTLMKGLERLLL-ADVL-
--------------------------------------------------------------------------------
--------------------------------------------------------------------------------
--------------------------------------------------------------------------------
--------------------------------------------------------------------------------
--------------------------------------------------------------------------------
--------SKTDIESIVKLSLDRLCL-----PSPQRALAAL------------------GLMFTCMYS------GKSVDQ
YS-PRPRDMEPS---------------------------------------------F--------TVSS-LDVIYQDPE
SLILAMERVTV-LFDRIR--KG-YPYEARVIT-RLLPPFLSDFFPP-----QDIMNKVIGEFLSSQQ-PYPQLIA--RVV
FQVFNNLHVQN-----EVNLVRDWVMLSLSNFTQRSPIAMAIWSLTSFFISAST-----NSWLKAL--FPHVVGRMGK--
----------------------MEV--VDKRL--FCLAALDFYK-QLT-D-------ENQKRAFVSTFQSV-----VQ--
-PDTPYQTLLNSLSP-----V-----------------
>Nematostella
M----------S-----------------LAVADK---LLKNFEALKNFREGIPVTDTNP--------------------
-------------------------------------------------LAKKKEGLLPIKDRISHINSIPELLCSTSI-
-------KGLQEFPKLLAIGIDTLLGSCDEDESDVRLVAGEALNKLIKGLL-DSNVGRLLVELYKEIK------------
--------------------------------------------------------------------------------
---------------KNGSARSLRAAIQRFGEICHLIRPQKC-RPFAANLLPCLARICMR-TEEAIQETLAV-----AVQ
KIFPVLGSFTSDNE---VKQLMKAFLPNLRADQAMTRRTAGTSLAIICHH-SRKPSMFHEWLL-NILLGMVLPFQEVK--
----------------AAPVYLGVLNCLRQIIPNLDDMSSHEEIMRGSFGVHMAPRGSRLSEAQGINIKQLLQMYEVLMH
CTKH--------------SNHNVVNASLETLQQLLRTPPAP------------LLEMLLSSDGIVPTIKP--DTLPEV--
DMD-----------------------------------------------------------------------------
--------------------------------------------------------------------------------
-------------------------------------------------ISDDKENKEETASIATTETSD------TGLG
SEVRSD------------FGSTADLLASQ---STKGLISVDREGLVTPQ---DSDEQLAQQIQHLGTSDKDTQ-NQTDEE
EQGEEADTIGDLSTPPPSSPRE-------------------------------------RSVSDPGYFGEGEDNVDEQGV
----AIS----QTDTNQDDTEI----PDELPRKETDRLSADL----------G---ELGQDLEPI--------RTESV--
---------------STQEVRI--LVESSFEIEAVACEG-VPLVHCVRLMCS-FLLTGRP-GEVLPDSNVRVSVKSLALA
CIAQAIRLYPESFLGYVVPSCDS---------------------------------------------------------
--------------------------------------------------------------------------------
---------------------SDGVNVPDNRTQLVRDILQFNAHPDPQLRGALAS--VIGLVISAGMKKGRLDFEEWSN-
---RSCEE--FNTPVLSLP---SLLSVLGCILQDDSPVAIRQACAAVKVCFNLLCSSPHCSHAL----------------
--------------------------------------------------------------------------------
----------------------------------------------DLVHTLAKLKNNSYWLVKVELLELIAEVDFRLIA
FLETSSSGPD----KR-----------------------------------KV---ELNDWLLSEVVFVLLGDADGRVRH
AAADCCVSLVPRLLFCTGDKRQNAVVQSAE-----YTVPSISFHCLDSLS----SHTYGNPVLS---------------G
P--------------------------------------------------------------------------PRSKP
SLEPSVSRLVS-LATETLGHST--------SKYLTVGCIHLLYTLSQSYPVSTLPGAWGCSVGQHCHSPVSPYFTSSGSP
PRPGS------------------------------------PSMTCTGGGGPLSLAVA-CVT-SSWLGYDLNAHQNLLLL
SGQLLFGIGCSGVQA--SLKLHAG-------LPQEESSPAMESWNPFADLTLAPVVEKLVNHLVKILNIYAHVIDGNVPG
-AHSFKLSFPTSPSVTAV--PKRLLKSKRA-------MSEADLAN----TPEKSPSK--TSAS----PAPDTEQTPPHPP
PPKSNIGTFHQSSHYMKLYDVIRGTHHNYQ---------------VFISY-VQKQKLFGLFMLHVTHITSVKQFTSLTL-
--FATHVEEI----LGYLQACAKVEPCKAFLSVQQLLRAMFGINAVSQPELVQS--PIYP---ECLADS-QVTLPLKPAE
R----------VNSTGSG-LYYGCFVQPLEDFRATLEK-SFKEEETEGSIRK--GLG----SFFKKF-RKRSGSLIR-PA
VK--LDKGSPIHSFIRLFEPLVIRALKEYTLSACATLQQQ-VLSLLAQLIKLRVNYALLDADQVFISYVQKQFEYVDAGQ
--IRDCDT--FLPYVFQFLVLLSYDCYQ---------PKFNQAKAIVGMAKVIQL-------------------------
-----------------------------------CDGIMASGQSAKTHAIPALQPIVHDLFTLRTSA-----R------
--------------------ADTGKEVETQREVVVSMLLRLVQHAEVLEMLSMVLQCYQR-------------------E
DEEK---------WKKLSRQV-----------IDMLLPLLAKQQALVETSF---GLDALRT----------LFQSVSEVA
LHPADVLLKTLFF--PVHLG------------------------------------------------------------
---------------------------------------------ELLTLERWLSMVLVLLHTVAANITEEQLLSRISQM
NIKLDCLQGIVDDSLDSSP-----NEMIDTND--------DQAPPAQLFGL----------------FMLHVTHITSSRI
VRFSNM----------AFTTSY-QDTSFLVKQFTSLTLFATHVFMS----------------------------------
--------------------------------------------------------------------------------
------------------KRYPRITQATASLCHSSP------------THPIIPEICKTVNK--II-PTHPLSVLQWCKV
LQSIGYADLSYWYNLIGT---------CS----------------------SEDKTGE---STMNREIVRQGATLLYCDL
LM-------------DKEETS------L------------------------EDMVRLDDE-PP-----VTRLIR-----
-TLHGSADGS--RVLLETFIATHALGTSTKNLQTSFPKRLVRCLVGV-HSSQTCLLLKILAE-FFLNSHCR-------AI
RRLVENNICKRLEANLPQ-------------------------TKGSPSETVNQE-LIAVCNLLASKKSIQRNP------
-----------RLHSLVHRILQTE---HRPYGAETRT-------QHLV-----SSMKDY-------------T----IDQ
EWFSRLVSHCCC--ATGPADST---------------------------VRPRPARESVQLLSALEFSTVCNIMAS--ED
FDLHLLEDCVLY--GVERTLHFTARRM-NAGQETAVYPYENTEHF------ESTGVDHLLLAAKLTLFRHLASTVEEITS
TVHSTGSGE--------VPLSSRITLDKSKLDRYCKDAS--------------------------ACRRLLDLSAGLMSY
CSVTSSLPRQ--CELSPDERACLCRFAFIPLAVMHQKFQASD------YPSSDDLGTAVECLGKASEDYTL--PVNGVE-
FVTLL-------CAAINHVYSLLRAVALHAHEH------LT---------------HGC----EDDDAL-QES-AEFQ--
---TITFACDQISDLVHYV-----------------------------HTQLEPGPSS--SSVLPLFL-MAPFKSAIVGL
ARRPLVNSY-ARTPPLVWK-FGW-MPTPE-GPLKTELPPLP-IE--ILKEKDVLNEFVIRVNIL----------------
--------GWINRQQFEETWAALLGVLSSPPLPD----SVTPEEDMEATHACCLAIRCISSLLLQTTLYPASGNCTA---
-------------------SGYLHGPRHRDLPFLGSRAGKK-LAVVRGIMEEEFITSCCAGTYLTHEELQHERSASLHRT
NSFTQNHGSTAVWTSNKLLFDHPLYGLNVD-RIPGFHDYTLGQVSYKSHLFGFPLSV-----QALHSQAQAEL-------
-----QESPDSD--DE--A-------------AVVVS-VPHMPRPEKLDIRSCLQFLLELFEQWMSPYVQ--------PR
-TPLMLLSEATKALVVFSD-------LFVDGHHFEWVLDTLLDLHHNHPT-ENDLLTQYLLPVICKALAFLKT-EGP---
-----TAERVCKIVES-SLRSPHVPLQVSALYGAMYIMEAHV---------SSVVA-QLIPILTDHLGRKLAALPNA--V
MLAQQHL----LVMWSAVFYLLE---HYSDEISDQEFKGNVLKTAVRIAASNE-ESTPPCVYHAILRGLERLVV-SFAL-
--------------------------------------------------------------------------------
--------------------------------------------------------------------------------
--------------------------------------------------------------------------------
--------------------------------------------------------------------------------
--------------------------------------------------------------------------------
--------STSESDALVKLSVDRLSL-----QNPQRAISAL------------------GVLITCMYT------GKIGDR
PSGIYPQSD---------------------------------------------------------------VAEFPTED
RLLIAMERVSV-LFDRIR--KG-IPSEARVVS-RVLPLLLLDFFPP-----QEIMNKVIGEFLSSQQ-PHPELMA--EVL
FKVFEGLHSQG-----QHSDVRDWVVLSLASFVQRTPLAMAVWSLSTLFTSAST-----STWIRAL--FPHVVGRMGK--
----------------------LEN--IDVCF--FSASALDFYENQGL-D-------SSQKGILVSTFKSV-----AT--
-AGSPYIGVLRRCEN-----ST----------------
>Trichoplax
-----------------------------MSAADK---LLRAFEALKNYYEGAPEEDPR---------------------
-----------------------------------------------------KKEVLTTKERIFFCSSIPELINTPSI-
-------KSLPEFGKLISIAIEILLIACDDSESDVRMIADEVLNKTIKVQT----YAIGIVVLYSTICCV----------
--------------------------------------------------------------------------------
---------------YNGTSRSLRAALWRFADLCHLIRPQKC-RTFALNALPRIVRICKR-QDDSVQDTVAS-----ALQ
KICPVFGKFINDSE---VKILIRNFLINIKSSSATARRTAASAVTLLCRH-TTKPNYFFSWLV-SELIDILLPLQNVYQ-
----------------QNFLLLGTLLCLRSIVPYLSKPIKDTVSGGIHGTIG--GIITENADSSPVNIMHLIKVYGIVMA
CLKH--------------TNHNVVTAALETLQLILKSPPKS------------LLSLLLSDPDDTLMINIA---------
RIGSSHEIVP----------------------------------------------------------------------
--------------------------------------------------------------------------------
-----------------------------------------------------------------------------NKS
SSNLDQ------------LESKADNVEASID---PAISAVENKDSLAPDAVIDLADNVAVQLNLNQS-------------
--------------------------------------------------------------SDATTTNQ-----DSAGV
----SQP----VTEAN-------------------------------------EEDSLADDSSDI--------SRPSI--
---------------EGSDISR--IWDRLV-----DSN-KAPIVSCIRMLCTSFLLDGEN-GQLIPDKIIRVSVKVLSLN
CVSQALGFCPQAFIAPLYAQSIASY-------------------------------------------------------
--------------------------------------------------------------------------------
---------------------QEGRNDQAFEIYRVRDVLQYANHSDPKLRGNIAL--LIGNYIKTSLIVAGYHYDLWLH-
---SCLSQQFKNEHEVYLE---NFVNLLLLLLKDESSVVIGMAIQGVKLCLNSLMKSDESQLSW----------------
--------------------------------------------------------------------------------
----------------------------------------------NIIATVLQLKIHPYWLVRVKLLDILTELDFTLLH
YWHQSRANIDFLRS-Y---------------------------------CSPC---T-QQQVIDEVIMLLLGDEDIRVRQ
ATTTTLVKIIPHLFYPIDHPKGDYITAAAQQ----SLVDDVNIL-------------------------------NYEH-
--------------------------------------------------------------------------------
DMSKNLSLLTK-A---KLHITS--------SKYFMTGCLHALSILSNNYPVDKYSSAWGYHRSKP---------------
----------KGDLSANT-----NNVSRQN------SFGSLDDISGSNGSGPLPLMVS-LLT-SSWVTFDLQTHNDVLIL
ACNLLVGASFNSILT--SDG-------------ENGKFEITESWPALSDFLLVPLANQLFAHISRLLNIFTHVIDDLPTT
-IPQTQKAKEFL-------------REKSG--------SIAGLTA----SASAGSLA--AVVS--------PKKRFSFRN
RDNGIVGQFVNVAHYFKLYEELRNVQSSYQ---------------SSLATNESEDKFANLLKTTLTSFSKILEVATLNE-
--SGRYVEEF----VNYMQACIKRESAATLRCVQQFIRCLFSINAATNPWQIPV--N-------------VCRN--RYTN
K---------AAKDIFTG-FHQIYSELPLKQFAIKMI--GIKNSQD-DFQLE--EDA-----VTIKS-HSRLPAS-E-TG
GR--ADN-KRPVQLIRIFEPLVIHALKQYTFTSSVDLQQQ-ILHLLAQLIKIRVNYSLLDADQSFVNFILRQFELIEAGQ
--MKESEN--IIPSIFQFLILLSYERMN--------------LEPIVGIPRILQL-------------------------
-----------------------------------SDGIMASGQLAPAHVIPAFRPVVFDLFNVRSLL---KPK------
--------------------GEEGKQLDAQREVVIATLMKLMDHHETVELCLVILSSCR--------------------D
EENR---------WKRISRQM-----------VDFLLPLLTKLQVNVDSIH---ALHVLHR----------FFEMVMPIS
LRPIDMLVKAFFT--PANME------------------------------------------------------------
---------------------------------------------SEVKVHRWLASILIIFHIFLLRADEDTILGRIEEM
HIDDRQFTLS--------------NEDLERSN--------YN--AVDVLTQ----------------FIFYVIKNATGKL
VESIT-----------TPSNEE-SKYAFLGAEIHLLFLYLKYIIKK----------------------------------
--------------------------------------------------------------------------------
------------------AVYRKFTQQAKSLIKNYQQE--------GYGNTIIGQINSLILD--LR-QSMPRLVLDWCEL
LLQLEFTDKGWWEQLLLR---------GEYVSKIAL--------------RAVN-----KLPSCSHEVIRRGIILLLSDS
LQ-----SYYQGPT-FKQILPWFISNYA------------------------LNIVELSFE-PP-----AINLLN-----
-NINGDVELS--GIFLQGVADGLKFSMINLLSKPSFGRKLVRCLSDI-HDSLTGSLISLIVT-KLLDTHHR-------CI
GRLFETLACNRLDFLLTE-------------------------SVEDCQQQLADGKADVLTQFLKDTFKLNRHL------
-----------RLKSLIIRVLNHVT------INGDEI-------SQL-SRQC-SLNPTI-------------Q----VDK
VWFLDMIKHRCF--QDKNSINA--------------------------------SRKYSLLLRNLPLSDAIEILNS--HD
FDISLLEDCITV--CLAEFQQQKNRDDYQREQA------ALSQNI------DLSSADH--------------DTVETKTS
ATQFSS---------------------LIEFKNIIRDFQ--------------------------RVKDINSLTKCLTLV
LESEVDLTTV--YHLPDEFCEAAARFALLSLGVSCRMITEL-------IYCYEELYSALSCASVALFSKKYVSIYSNPD-
YHRVI-------CQGVQFVYDLIISIGLSPGSV------LV---------------PSN-LSTDLIQQS-INN-DHDI--
---MIFNACDKLSQLLHSH-----------------------------RTIFSYSASHRSVFQIPQFL-IGPCISVLLGL
ARLPLFNSY-CCVPLLAWK-MGW-LADNQ-YRPSEPLPPLS-PD--YLCEKDILEDFVFRINLL----------------
--------GWTSRQQFEEIWVALLGVLGTSI---PE--NASNDEISELNHSNCIAVEGLTSLLLHTSLIPIAGRPNR---
-------------------CIYLHSSRHKPLPFMNSVIGKK-LEKISRM-------------------------------
-----------------------LYNSNTE-RDISCLEY-IDYIS-----HSFCVLRMQ---VSETDNKD----------
--------------------------------DAYSR-ATIFEEDIGLDIHSCLQFLLELFERWLTPQTS--------QN
-ITINLKREAAKSVLVLSD-------IFVNREHFQWMYDIFMELYKYHPA-EDDVMMQYIVIGICKAVSVLGL-DGQ---
-----SVDKICRVIEF-SLKSSYLSLQICGLFGVLYILEPHPM---------SSLT-AFLDPLINYLTTKLSEVQLM-SF
GTSYQHT----LVMLSAAFFIIE---HYVDDIKDTNFFQLVLQIVVTMISASD-EVTPPVIYHAIMRGLERIIL-SFTL-
--------------------------------------------------------------------------------
--------------------------------------------------------------------------------
--------------------------------------------------------------------------------
--------------------------------------------------------------------------------
--------------------------------------------------------------------------------
--------TPDESDMIIKLSIDRLSM-----PSPERALSAL------------------GLLLTCMYA------GKIESE
ANPGQ----------------------------------------------------------------------ELDAM
ANVHTIERVTI-LFDRIR--KG-LPSEATVVA-HILPSVLEDFFSP-----QEIMNKVIGEFLSSQQ-PHPQLMA--EVL
FKVFENLQRQS-----QQTAVTKWVMLSIGSFTQRTPLAMAVWGLNCLLISAST-----NYWIRSL--LPYVISRIGK--
----------------------LEQ--VDKQI--FYTTALDFFVNKNL-D-------QTQKRTFLSTFASS-----V---
---SPYSDLNRYCQQ-----YISNQ-------------
>Cioin
-----------------------------M---EK---LVKSVNALKFFYGGLSSEDKT---------------------
----------------------------------------------------QKDALQSPNERQSHCNIVLESIISPSI-
-------RSLADYPGLLAVSVETLLQSCADDNADVRLNANECLNRLIKGLY-EISNSKILVELYKEIK------------
--------------------------------------------------------------------------------
---------------KNGHPRSLRAALDRFSRLSHNIRSNKC-RPYILNLLPCLCRISQR-EEDGVQETLGL-----SLV
KIFKILGPFASESE---IQGLLASFLKNLSHKSATMRRTACVCLHSVILN-CRKQNLVIGPLM-NSILDILLQRNTDR--
------------------NTVLGCLQALRILSPLFETCVP-----------GK----ISEQHILNEHRDLVLKVFDACVF
YLDN--------------TDHTIVTAALELLEHLLNEFSSE------------LASVLIVCGKLKPTSFTPST-------
--------------------------------------------------------------------------------
--------------------------------------------------------------------------------
------------------------------------------------VLPDEVETKATSVTTDEV--------------
-------------------SSLSSLASSTIE---DKLSCIRLLPVED-QDP-----------------------------
-------PSNPLLPHNEQTSQTNGA-----------------------------TEHKDQTEPSDLDQT----ITNHDED
AKLPENG----HEESL---SES----SLE---------------------------------------------------
-----KM--ASDPISTSSDLIP---VSH---LYATESST-LPIITLARMLCQRFLLSMET-GEVLPDKQVRVSNKNLTMN
TLSQLVKIYPAAVCHSLLYYES----------------------------------------------------------
--------------------------------------------------------------------------------
------------------------------SSQYMTNVFLYSTHSDPKLRGSAVT--LASVFIDAVVTRNRKGIKDWFK-
---NVERNSSTSLKCPTIE---DLISLIHGGLIDESSTTTRQACSAVTSCVHTLLNSMYFSYGL----------------
--------------------------------------------------------------------------------
----------------------------------------------ELLHMVVGLQSSTYWLIKVSLLELLASLNYRQIA
YLELLSKRDAAS-------------------------------------VKTQ---SLPHQAL-SIALKCLCDDDLRLRK
TAAATIVTM-PTSFPTPNELYGDLLTSEAAE----MTRQWMGGSEMRNEDEE--EQSNDAGSAKSLLKT----YRGYEMD
C---------------------------------------------------------------------------KNSG
SITDSLSYIVG-EVSTMLTNSS--------NKHQTYGCLLALKQLSIKYMVSNHPVAWGCYAVTD---------------
----DRSRSSS--------NESETSSNSSDS--KIPKRQSSNPNGSQQQFGILPFVMS-LLH-SAWLPLDVTAHSDALVL
AGNLVAGAASDGLKVFGPVAIEDQ---SFEKVSVKTVTSNARSWATIYDPVLGSYANQLFTHLTRLSSIMHHVISEVTPS
-PP-NKSVLPNIAPGNIPSPIKRKEKAPG----------EQNRSS----PPLTRKLL--PTSSL--GKPG--NKENQDEK
PTKKLIGSFYNNRTLMRLFDQLTGSYKNYK---------------VSLEF-GCDDRFCSFLSSTLDVLSQVLELAVFQD-
--IGSYTEEL----LNYMKSLFTVEPTLTIQSVQQLLKALFGTNLVSNMIPHDD--S-K-----------PPNPP--TSP
I--L--------LNSTAG-FYHQIFHHPLNHLTMAIANSSFHHSLQTKSPPK--ENDGWFGSIKKKV-EKKLNDVSK--N
SK--GSK-SSIQNYIRLFEILVIKSLKLYTTTSSVEFQQKHVLNLLAQLVQLRVNYCMLDSDQVFINFIIKQFESIEGGL
--VRGSES--LIPHVFFFLVLLSYERYR--------------TKAVITMPKIIQL-------------------------
-----------------------------------CDGLMASGQGSASHVIPAMQPIIHDIYVVRASS-----K------
--------------------N-EPPEVTTQREVVQFTLLKLLQHPQVFKMLITILVHGRR-------------------E
NVEK---------WKKYSRQV-----------ADVLLPLLSQLKVNVTSHD---DVSTLHS----------LFEAISPSA
LRPIGLLMDLLLKM-PKSLN------------------------------------------------------------
---------------------------------------------SISHIHRWLTNILVLLRVLICQASEHDILDNIDLS
KVKIKHMTCTHMEYLHSD-QTSQEEEEQNMNE---------VFSPADILAM----------------FFHQVIGSCCSTL
LHYSTN----------PRTKSDESSQILLSQQINELFLALTYIHRS----------------------------------
--------------------------------------------------------------------------------
------------------GSFKNLTSACKK-VSSTN----------LNGFYTSDQMVSTFLH--LT-YSHPIITVMWAQY
LSHFVPVTAQFWENFTGC---------K--------------------------DTND---FPLNRNIVKKGCVILLADY
VC--------QNSN-QSELSLWLAEHHV------------------------NDIIMMSEE-PP-----VQDFLT-----
-SVHLGAEES--ACLIKAISKL---SKTQQNIKVSFILRILKCLSGV-SIKSSESLISLLLSPKFLFSPVR-------RV
FAASLLFLQSTVENILEL-------------------------NKEEALEIIPTEFTQNLMQKGESLKEKSQYI------
-----------LFCDLISQLHSHVTGEQPITSE---K-------PGPT-----IQALME-------------K----PNQ
NWFNSVILS-CL--DE-----------------------------------NRWTPECARVLACADFDDIIDIQGN--NN
FTAQHLASCLYN--GIHEVTSMHGA----------LIPY------------PEDKTSNLLAASLLTLDKKIKAVLEITPG
NTEFDTPLM---------------DNSNTEI-KFIGDKN--------------------------FQQNLMWLNRCLVNM
LKFHHILPTQ--YQLPNVNSNDYLNIIVLGFKVTQYGIHKGK------IPSLQDIVCVLESLQQALAVQSLHAMFINE--
-VKWM-------LQTVQVLFTIMEIYIGRIS---------Y-------EPPY---LPSC-IDKEEA---SSIY-NNSS--
---NPLSSCIKLYQMLSLF-----------------------------RRQHKNKEMF---AKIPTYI-VRPINNIILHL
ATSPLFKNY-VRTPLVVWT-FGW-NPALG-GDTGTSLPEIP-SD--FLQEKEVLQEYIAIVNQI----------------
--------GWTKRTEFEETWASLLGVLVSQPVVSD----ESSG-EAMHTEISSLAIRGLTSLVVDCALYPECGRKAT---
-------------------SKYQVFYRHPTFKLGNTKAGRQ-LLKVRGILDDESRFMTQ---RKSHQDTHHQNTS-----
--LNDSSN------LSSSLQSNKWITMNTE-RVLSSSAYGLAQSSVRSFHLLHGITPMK---EELYDGDYDSA--TMHSF
EYDNSLSNDGSDVSDMFETSEAET---PDVPTNPAPP-LSPLRIRDGVDVHSCVQFLLELYTEWFRTTAQTNQISGSSST
-IARPLLCECVRSLLLISD-------LFTEKQQFEWMFVALTTLHKSQPA-DDDILMQYITPSMCKAGSVLGL-NSE---
-----TSENVLRVLEP-SLRSTLLSCRTSALVGLLQCIESYP---------NPNLR-GIIDLASQFIPPNFVAISTC-PS
LFNEDYV----VLLASVAFYIIE---KCHDAVMP-EFTSVIIQACTLIISSRDVTSVQSRVFHSVTHGLQRLIL-SFSI-
--------------------------------------------------------------------------------
--------------------------------------------------------------------------------
--------------------------------------------------------------------------------
--------------------------------------------------------------------------------
--------------------------------------------------------------------------------
--------SASECDSILKVAAEQVHTN----PWLPRATAAC------------------GLMMTCMYC------GRMRIS
SNPDHGSPHGG------------------------------------------------------------SPEHEDVVE
SRLLAMERVTL-LFERIR--KG-YPHEARVMS-KVLPSMLDDFFPA-----QDIMNKIIAEFISTLQ-PFPASVA--QIL
YEVFQSLLERD-----QSHLVQEWVMLSLGNAIQRTPLQTAVWCLTCLFSSAST-----NRWISSM--VPLIISRVHD--
----------------------PTLD-VNWTF--FCKAAVDFYTCQLS-E-------ELDRRSFHAIFSTS-----SSSR
EPGSPYKLLLDCISR-----INGEQGILQ---------
>Ciosa
-----------------------------M---EK---LVKSVNALKFFHGGLSSEDKT---------------------
----------------------------------------------------QKDSLQSPTERQNHCNIITDSIISQSI-
-------RSLVDFPGLLAVSVETLLQSCADENADVRLNSNECLNRVIKGLY-DVSVSKILVELYKEIK------------
--------------------------------------------------------------------------------
---------------KNGHARSLRAALKRFSYLSPNIRSNKC-RPYILNLLPCLCRISQR-EEDAVQEVLSS-----SLA
KIFIVLGAFASESE---IQGLLASFLKNLSHKSPTVRRTACICLHSILTN-SRKKNVVIGPLV-HSIIDILLQRSTDR--
------------------NTVLGCLQALRILNPLFEITVQ-----------GK----ITDNQVLKQHKDLILKAFDACIF
YLDN--------------TDHTIVTATLELLDNLLSGFPSE------------LSAVLTKVGALNETSFTPSA-------
--------------------------------------------------------------------------------
--------------------------------------------------------------------------------
------------------------------------------------TKMDIVQDK--SVTPDEV--------------
-------------------SSLSSLASSTIE---EKISGIRLVPLEDTKTN-----------------------------
-------QDDPLLPHNDNSAVKNTT-----------------------------ALETLQTNAVDGETSSKTDVVHGEAS
SKTELNI----QTDNVIVESEL----NDD---------------------------------------------------
-----KSADGVVTQTETSKLLP---ISD---LYG-NSKQ-LPIVTLTRLLCQRFLVNIDT-GELLPDKQVRVSNKNLAMN
TLSQIIKIYPSAICYPIQDSVNE---------------------------------------------------------
--------------------------------------------------------------------------------
----------------------------VSEVHYMTNVLQCSKHSDPKLRGSSIT--LASFLIDAVVTTHRCGFESWIR-
---NVEKSTISTLNCPTID---ELSLLIRDGLIDESSTTSRQACSAVTSCVNTLLNSECFTYGL----------------
--------------------------------------------------------------------------------
----------------------------------------------HLLHCSMELHTSTYWLIKVGLLELLASINYRQVV
YLESLTSENSTQ-------------------------------------IKQK---SIAQKAL-SIALECLCDEDTRLRK
TSSAAIVSMATSYPTPNDD---DLLTSEAVE----KSRKWMGGAAEVKVDEEDVERSSDAGSPKSLLKT----YRGYEID
G---------------------------------------------------------------------------SNSG
SIADSLSYIVG-EVSTLLTNSW--------NKHQAFGCILALKELSMKYTVASYPTAWGCFLVDD---------------
----ERLRTAS--------NESGNSSQSTDS--KSGTKQSSN-SAAQQQFGILPIVMS-LLR-SAWLPLDVTAHSDALVL
AGNLIAGASSNDLKLYGPVPIEDQ---SFEKVSSKTLPSADRNWATLHDTVLGSYANQLFTHLTKLTSIMHHVISDITPS
-PP-NKSVLPNIAPSAIPSPMKRREKPSN----------EPNKPS----PPLTRKLL--PSSPL--TKPG-FTKESQEEK
PSKKLIGSFHTNRVLMKLHEQLAGSYRNYK---------------GSLDF-GADDRFCSFMSGVLDVQSQMLELAVFQD-
--IGSYTEEI----LSYMKSLFTIDPTLTIQSVQQLLKALFGTNLVSNLVPHDE--THQ-----------PPKSP--SSP
L--A--------APNTSG-FYHQIFHHPLNHLTMAIANSSFHHSLQSKSPVK--DNDGWFGSIKKKV-ERKLNDVSK--N
SK--SNK-SSIQNYIRLFESLVIKSLKLYTVTSSVEFQKH-VLNLLAQLVQLRVNYCMLDSDQVFINFIIKQFESIEGGM
--VRGSES--LIPHVFFFLVLLSYERYH--------------SKSVITMSKIIQL-------------------------
-----------------------------------CDGLMASEQGSASHVIPAMQPITHDIFVVRGSL-----K------
--------------------N-EPPEVTTQREVVQFMMLKLLQHPQVYKMMITILMHCRR-------------------D
NMEK---------WKKYSRQV-----------ADVVLPMLGQLKIEVTCHD---DISTLHS----------LFEALSPTA
LRPISLLKDLLLRI-PKSLV------------------------------------------------------------
---------------------------------------------SISHMHRWLASVLVLLRVLICQAREQDILDNVDVN
KVKVQTMTCSLFEHLQSG---SYPTEEAKETD---------KLPSAETLAI----------------FFHQLIGSSCSYL
LQFGSN----------PSTKSDESSQILLSQQINELLLSLTYIHRS----------------------------------
--------------------------------------------------------------------------------
------------------GSFKIFTAACKK-LSESS----------NENFFSHGQMAKMFES--LS-HVHPMLTVMWAQY
LSYFMPVQTEFWKRFTC----------K--------------------------ETSH---FALNRNLVKTGCLILLADY
TC--------QNSN-QHHLSLWLTENHV------------------------YDITMMRDE-PP-----VQDFIS-----
-SLHQDATES--KCFVEALSKH---LGTHQKFKPSFALRILHCLTGV-STKSSQALISLLLSPKFVLSPVR-------TV
FAASQQLLQTTVENVLKL-------------------------SREDAVEIINTEFAQNLVVQVENIKKKPQYR------
-----------TVCHLIGQLHDHVTGNQPITTQ---K-------PNVN-----IQLLLE-------------K----PNK
EWFKYVVLS-CL--QE-----------------------------------NHWSPECAGVLAHVDEDDITEIQSH--PS
FTLQHLTSCIHN--GIHEVTSVHGA----------LTPY------------PEDKTSALLAASLTTLLGKMIEVLENSNG
NT-VSQPSH---------------DKATENETNVFDDVN--------------------------FNDDLMWLNESLVLM
YRHHPMLPTQ--YQLPTEHYKHYLTVSMLGLQAIGYQINSGE------VPSLQKTMCALESLQQALFVKPICSMLINE--
EFKWL-------KDCVRIVFNILQMYIGKVP---------Y-------TPPY---LPSD-YDKEVT---SSIY-NDAS--
---NPLSSCIKLSQMLAFF-----------------------------RSPHENGQMF---REIPSCV-MRPLNNILLHL
ATAPLFKDY-IRAPPIVWK-YGW-NPPLG-GDSGTSLPEIP-SD--FLQEKEVLQEYISIVNQM----------------
--------GWTKRAEFEETWTTLLGVLVSQPVVPD----DSSS-ESMRSEISSLAIRGLTSLVVDCALHPDCGRKAT---
-------------------SKFQVYHRHSAFKLAHTKVGRQ-LLKVRGILEDESWTMTK---QKTNQDTHHNQHV-----
-----TQN------ETSSSYSHEWISTNME-RILSPSTYGLAQNSVRSFHVLHGITPVK---EDFYDGDYDSA--S----
--DNSLSNDGSDVSDMFDTSGPDT---PLTPANPQPPPLSPLRIRDGVDVHSCVQFLLELYTEWFRTAAQANQ---NSPS
-VARPLLCECVRSLLLISD-------LFTEKHQFEWMLTALTTLQNSQPL-DDDVLMQYLTPAICKAASVLGM-TSE---
-----MAENVLRVLEP-SLSSTLLSCRTSALVGLLQCIETHP---------SPNLR-PIVDLGSQFIPPNFVAVSSC-PS
LFNEEYV----VLLATVAFYLIE---KCHDAVMP-EFTAVVIQASLLIISSRDDTSVPNRVFHAVVHGLQRLVL-SFSL-
--------------------------------------------------------------------------------
--------------------------------------------------------------------------------
--------------------------------------------------------------------------------
--------------------------------------------------------------------------------
--------------------------------------------------------------------------------
--------SAPECDSILKVAAEHLHTN----PWMSRATAVC------------------GLMMTCMYC------GRMRIS
SNPDHPSTQGG------------------------------------------------------------SPEHEDAVE
TRLLAMERVSL-LFDRIR--KG-YPQEARVMS-KILPSMLDDFFPA-----QEIMNKIIAEFISTLQ-PFPGSVA--HIL
YEVFQSLHERD-----QSHLVQGWVMLSLGNAIQRTPLHTAVWCLTCLFASAST-----NRWISSM--VPLIISRSHD--
----------------------PSLD-RNWTC--FCKSAVDFYTCQLS-E-------ELDRRSFHAIFSTS-----SSSG
DPASPYQLLLDSISR-----INGEQGILQ---------
>Honeybee
-----------------------------MTTLNN---VLKAIEALKSAQESNTLLS-----------------------
-------------------------------------------------------DSNARKDKLTCCMTITEGICSPTV-
-------KVAAKFPQVLSLSIETLLILCNDDESDVRMVADETLNKIIRAMA-DSNIVKIQIELYNEIK------------
--------------------------------------------------------------------------------
---------------RNGPARTLRAALWRFGLLSHMIRPTRG-KAYVFNLIPCIVTIAHR-SEESVIETLSQ-----SLP
LIMKALGPFMTDND---VKTLLKAFFENVSSVQAAFRRAAANMILATCLN-CRKPQFFLNYVL-KYLLAIVVPINEDES-
----------------RIATIIGIFGCIRIILPHICNSSE-----------------IQDD--DIVQTDTLLQIYELCLH
YTKWH-------------SDHNVINAVLETLTQFLKSPSKV------------LVSLLLSNQGITHSRIALNQN------
--------------------------------------------------------------------------------
--------------------------------------------------------------------------------
--------------------------------------------------EMTLSLSQAS--TSSTATAC--EENSDYTL
NLLDSD------------L---PEINPKIE----KWILDSE-TVPPLAQNLQ----------------------IPKECT
NNII-----------------------------------------------------EMKGKILENYNSLKFGVTDNETV
EEG--------SDIGSEIEKSE-------K-FYSNLQN---------------ETKEVDTT-EEI--------ASSIA--
----------SPKKLSLD---FSLREID---IGTFTDSD-ISLKFCCRYLVSSFLLTGNV-GYVIPDKYFRVSVKSLALT
CVAYILRLCPNLFLIPVAK---E---------------------------------------------------------
--------------------------------------------------------------------------------
-----------------------SNSN--ENEQMITDILLFANHPDPQIRGNVSI--IIGTFLKSIYIQYGGSFKKFEE-
---EIANK---IHGIISLE---NLIKLLLKGLEDDSATTCRQTLTALSLCLPELLESVDNKHGI----------------
--------------------------------------------------------------------------------
----------------------------------------------TILTALPQLVKNPYFLVKIKLVELLSEISYVTVE
HI-----------------------------------------------SGGS---MFQKHFI-DVIVTLLGDQDQRIRH
AASDAIVKSIPLLHY--QQPHDDVITRKAVQ----YTEKFLSAVTRSSVELSS-CQQKQKFFINTSIQPFTALNF--HDA
---------------------------------------------------------------------------MNYRP
NIEYSLSIIIN-MLAEILGVQS--------SKYLVYGCCEALFRLSEVYNTTVYIRGWDCISPK----------------
-----------TLLKKSH-KKSGSRLDISDS------NFTNDMMPSSVSNGLLSLALP-LLS-SSPISLDLLTHKHLVLL
AGNLASGLAFCNFKP--NDPT-------------------KTWWGTFKDKQ----IELLLTHIMRVLNIFVHIIDDVQLT
-QTSTKTTLPSLSSAQTLSPKKKIISEPKM---------------------------------------KEKGEKIGSSK
FGKEQMGAFVSTSHYMKMYEILKAAHLNYL---------------ATLEP-YASEMYLSLLNAILDVLSQILEIISVNE-
--AAQIAEEI----LYYLQNTVVLSPTATVQCVQQLLKCLFSTNVCAQWNEL-----D------------IQKNSDRITI
L--WD---------DIKG-FYNYCFQSPARQMADTIKSIGN--NCRGENEPDT-G---WIGLLHRKG-DRKFSSIFK-NL
SRSSDQK-TSVASFIRLFEPMVIKSLKQYTVTSNVSLQCQ-VLMLLSQLVQLRVNYCLLDSERIFIGFVLKQFEFIEEGH
--VKQTED--LLPKIFNFLVHLSYEKNH--------------SKAIIGIPKIIQL-------------------------
-----------------------------------CDGLMASGQPALTYCIPALAPVVEDVFLIRNAS---L-N------
--------------------PVEQRELETTREVLISMLLRLVEYYQIIELLALCLTESRFSG---------------DGN
GEEK---------WRRWSRLT-----------MDSVLPMLAAGKIRIESEK---AHIAMVK----------LFAAISPTV
FRPVDPLLKVLFAK-PDSLD------------------------------------------------------------
--------------------------------------------TSSLRLKRWLGVVNVVLLSLIACSKEEAMLARLSDL
SINFSELSQSFL--HTKTPRTTDPLNVLDS-QL------V-KVPPERILAR----------------FIFNVINLVGSKV
YNLL-GLLNPNLNDPYVAFSESIENDYYLIHQFAFFLQLCIHMFES----------------------------------
--------------------------------------------------------------------------------
------------------GSHCKVANAVIQMIQGRNVL--------EEEKLPIADLNFLMLN--IG-NKCPTLTCQWAYL
MTLLGYNEMTFWSKILGT---------RRAEYVVHCPPS-------------EEKNIN-CESSINIQIIRKGGIILFCDY
VC--------ETLC-DAEPLTWLLVNHT------------------------EETVNNAIE-SP-----VRDLLTT----
-AIHRNPAAS--GLLVQAIATKC-----TDLSPPSFVKRLLQCIEGA-HHSQSGAVLMTLIP-RLLSTKYL-------AL
SRMAAKIASRRVEILLTT-------------------------PAADVMKQLSKDDFTKIMETLQMTKLAKKHG------
-----------GLVSLLNKLGVQYYDLSPLELD---Q-------CRPFNP---STVKSI-------------Q----LDR
NWFLSQVKLRCC--NSNIN---------------------------------YNLSEAAQLLKVLDFEDCLGILSS--KE
FNIAILKPCIIL--GVRMSVE-KCQKL-EFGVAQNEKDF-------------NFETSPLYSAAKQCLLDHIHYVIDLMPK
PHYIYNPTQS--------NNNSRELKYAIRLNELLNESV--------------------------YWDVLFMLIPAVKIY
MKTLSKLAKYNLAKIDKKSEEDLAKFAVLCLELTYWMVHCDEKKVK--KLKPRNMELALSCASEILKHPGPNKVFGENT-
RYSWV-------CSGAASLTRIVEYLLTTLD--------AL---------------PVIDT--RALDPALE-D-EDTK--
---DFAHACTRMANLIAWL-----------------------------ERCQN--EQ-SSSTNIPRYM-FDTIQDLIVSI
SRQPLVNSY-ILTPPLVWK-QNW-NVVGS-GPTKCYFPLLP-SESNLLQEVEILEQFIYRINLL----------------
--------GWISRLQFEEIWMALLGVLNLSQNE-----NVSREEIPTLIQASTLAVQAITKLLLHTLLLPYPGNPKA---
-------------------SNVIHHPRDPQLS-VHKISSQK-LYAIQDLLTWKHECMNDLEV------------------
--NYGLN-M-----------DHIFHRGNVE-RVANLCKYTYSQLSVSYLWSLCNLY---------EDKLNASV-------
-------------------------------LNLKNR-RNDALMSASLDLDSCLRFLIELYTSWMSPQAN----------
-TPIQLLTETVKSILAISE-------LFVERAQYQWMLDMCLEISRIHPA-ENDILHQYLVISVCKAAAVLTPLDFE---
-----TLDKVKRLVDA-NLKSNFLPAKVSALHGSLYLLQSAVLANC-----EETMN-IIHPLAIEYIQKHLDAQDLNGVL
SQSEEHQ----GVMWALVFFLLE---HAEDTPPDTEAPA-VLELVLTLLT--S-QNISYSLHQTLLQGLERLVA-TKSV-
--------------------------------------------------------------------------------
--------------------------------------------------------------------------------
--------------------------------------------------------------------------------
--------------------------------------------------------------------------------
--------------------------------------------------------------------------------
--------IGKVAEQIVKVAIDRLKQ-----PSPMLSLPAL------------------QLLLTCMYT------ESSDRL
NQLKTEE-----------------------------------------------------------------PLPDIEPE
TLVRSIERTSA-IFDKIR--RG-HSMEVELLC-TVLSSVLADFFPP-----LEILTKVIGEFLSPQQ-PHPRLLS--AVV
FKVCERACTCA-----QMELLQDWVVFSLPNFIQSLPITMSTWCLSCFFISTST-----NHWLRAL--FPYIQSRIGK--
----------------------HEY--EDKKI--LCIAASDFYR-KLS-K-------ETQKKAFVETFEAA-----AKE-
-PGTPFSDILASF-------------------------
>Wasp
-----------------------------MAALGI---IAKAVENLRSLQIQESLAT-----------------------
------------------------------------------------------DHEDKKKEKIANCMALTNGISIASV-
----------KAAPQALNLSIETLLCLCDDSDSDVRTVADECLNKIIRAIA-DSYVLKVQFELYREIK------------
--------------------------------------------------------------------------------
---------------RNGAARCLRAALWRFGLLSHMIRPVKA-KVFALQLTPCILEIAKR-REDIVIDTLSQ-----SLP
LILKTLGHYIPDKD---IQALLEAFFKNVTSSEAILRRASANMILVTCLN-CRKPLQFMNYVI-EVLTDMLSRVAEGNME
EEEGKDD---------RVNMILGVFACLRLILPSIDANSD-----------------LTQDFNEDHILDHHICIYELSLF
YTKFY-------------TNHNVINAALETLAQLLQNPPKN------------VVSALLSKDGITQRINKLKER------
--------------------------------------------------------------------------------
--------------------------------------------------------------------------------
--------------------------------------------------G-KQWPSRIS--LSTTVYS---EDNLESSS
NLFESD------------IMDIPEIAPKVE----KWMTDIA-DVMPTVEKAP----------------------SKLDIS
DSSQ-----------------------------------------------------IIDTKDIDDYSGLIIGSIENESM
ELE--------SNAGSDVGRFE-------KPIDTSLLHCS-------------DPKEVEEDLDDT--------TVSIV--
----------STHDVSLHQFMLQRNDLA---IGSLLDND-VSLHYCCRFLVSSFLLTGSP-GQLIPDKHFRVSVKSLALT
CVGNMLKLYPKMLYDSLKKIPRK---------------------------------------------------------
--------------------------------------------------------------------------------
-----------------------DPQV--EDRQMISDILLFFKHSDPQIRGNVLL--AVGYFLQGIFLQNNGCFSKES--
-----------SESSVTIE---NLIQLILKGLEDESATTCRQTLTALGMFLPSLLESEESKYAI----------------
--------------------------------------------------------------------------------
----------------------------------------------LVLKVLPSLVKNPYFLVKIKLLEIVSELPYTTIE
HV-----------------------------------------------CGEL---QFQENIV-NVLLKLLSDQDQRVRK
AAGIAITKIVPCLYS--QSPHEDAVTRKASL----YAERYLTCVVGGPTDPTTPFYIEHKLLINSLVSPYDVLFRSSSQD
---------------------------------------------------------------------------RGSRE
RTDEALSRILG-HLVDRLLVPS--------TKYTAYGCCEALSLLSETFLTTIYPKAWDCFVPAG---------------
----------RVAVKKAV-KKTAVRPDSADCCF----GFTNEML-SPISNNLFCQSII-LLS-SSPLSLDLCMHRHLLLL
AGNIASGIATTNSRQ--MHASNSSSSSTSSKSETETTGGDFKYWTFFKDKQSSRNMEQLLVHVMRVLNIFQHVVEDLPSP
IQTVSKSSLASLSPAQSLSPKRKLLPDHQSSK------------S----KSSSSSS-----------GSSEHHHRLGFRF
GGKEQMGSLSNNAHYLRLYELLRAAHANYR---------------VTLDQ-DASELYVGLLNACLQVLSQILEVASINE-
--AGRIAEEL----LSYLQSTVLLSSTYTVQCVRQLLKCLFGTNLVARWQDIYD--AQ------------AKQEKRENSG
L--QDEEFRKAEFEVERG-FYEQCFQKPAKLMVERIKGIGS--NCRGGNEPDA-THRTLVTSLHRKE-DRKVSSILK-ML
SRN-SDQ-NSVGSFIRLFEPLVIKSLIQYTISNSVPLQCQ-VLMLLSQLVQLHINYCLMDSDKIFIGFVMKQFEFIEEGH
--IGLTEQ--LLPRIFDFLVRLSYEKYH--------------SKLIIGVPKIIQL-------------------------
-----------------------------------CDGLMASGQPPLTHCIPALVPVVEEMFLARNTP---A-N------
--------------------VSEEKELETTREVLISMMLRLVEYPQIIELLAKCLTESRLSN---------------DGN
GEEK---------WRRWSRQT-----------MDTLLPMLATRKVRVESKR---AYFALVK----------LFSAVSPTV
FRPVDPLLRVLFTM-PPPVG---------------------------------------------------KNLI-----
---------SYNVP---------------------------STSKNILEFKRWIGMVNLIIMSLISYAKEEVMLARLSDV
TSSVTDLPEILLIPDSSRPISGDPLNVSGLLES------F-SMPPERILAR----------------FIFRVIGSMSSAF
VEMFQGAKLKPLND----TNES-DEDEYVIHQFTLLLQLCIHMFET----------------------------------
--------------------------------------------------------------------------------
------------------GSHCKVANASMQLVKGDNIP--------KDERLSLNDLNEVMME--IG-SSCPILTCQWTYL
LTLLGFDDMSFWSRVIGY---------PS---------D-------------NVEAEK-SLGSINAKILRRASTILFCDY
VC--------ENVSSDSERLSWLLLHHI------------------------ETMIGLADE-SP-----VRELVAV----
-AVHRDPVAS--GLFLRAVSDNCC-RNGQLIGGPSFIKKLLQCLEGA-HQSQSGQLLTVLVP-RLLQSKYL-------AL
SRMAAKIASRRVEVLLAL-------------------------GKEEAMMQLSREDFKAIMNVLKKENMTKKHG------
-----------ALIGLLNKLATSHYELEALELD---H-------SKPFNP---LEVKSI-------------K----LDR
AWYLSQVRSRCC--NPCVS---------------------------------YGCYESAWLLNHLNLDECLEIFSL--DD
FNVKLLQDCIIV--GARLTAQ-ASQQL-ELD--RSVKPT-------------DNSESVLYKAAKISLIGRLRSILQELPA
SHEIFLPIQN-------LNDKPKQSNYTSNLSSLLLDKA--------------------------YRTSLFLLIPAVTSY
ISCLPKLSHS----LDAVHEESFARFALLCLESAHFLLLQQ-------MTTPRELGLSLKCASIILQDPSASSAFDSSPE
HHSWV-------CSAAAALTEIVGHFCKSSDDD------EL---------------PGIEKGCSGLQEALEAG-KETK--
---SYAIACLRMSMLVAWL-----------------------------EKRQKSGEE-GRRQEIPSFF-AKPIKSLIISV
ARQPLVNSF-VLTPPLLWK-NGC-AIVGT-GPTKCHFTLFL-SEPNYIPELDVLEEFIFRISLL----------------
--------GWNSRQQFEEIWMVLLGVLNVSQLQN----EMESETSTSLSHTASLAVQAIANLLVQTLLLPCPGNPNN---
-------------------GMPIKHTRDPQLS-LHKKSTKR-LFFVQDLLLWKYENSNIVST------------------
--ATTVPVL-----------EHLFNRGNLEPRTIDPHNYSYGQLSISYLWSLCSLH---------EDKLSSST-------
-------------------------------LSLKKR-RDEALAAASLDVNSCIRFLLELYASWMSAGTK----------
-LPPRLLYEVVKSLLFVSE-------MFVERSQFQWMLESCLELWKVHLA-EDEILRKHLIVAVCKASAVLTPLDPE---
-----TLDKVKRSVDV-GLKGS-LSMRIATLHGILYILQSAVLANC-----EETMS-AMHPLAIEYIQRYIDPRDSNRVT
SQSEEHQ----CTLWALVFFLLE---HAEDSPPDVEAPA-VLELILSLVS--S-QGISTSLHRMLLQGLERLVA-TKSV-
--------------------------------------------------------------------------------
--------------------------------------------------------------------------------
--------------------------------------------------------------------------------
--------------------------------------------------------------------------------
--------------------------------------------------------------------------------
--------IGKVSEQVVKISIERLRQ-----ANPALSLPAL------------------QLFLTCMYT------DTADRF
NQPELEE-----------------------------------------------------------------PLPDIEPE
ILVRSIERSAV-IFDKIK--KG-YPMEVEILC-AVLSEVLIDFFPP-----LEILTKVIGEFLSPQQ-PHPRLMS--AIV
FKICERACNST-----QLGLLQTWVVFSIQNFIQSLPLIMSTWCLSCFFISTST-----NPWLRAL--FPHVQSRIGK--
----------------------YEY--EDKKI--LCLAASDFYS-QLT-N-------ESQRETFIKTFEDA-----AKT-
-PGTPFGDILASF-------------------------
>Tribolium
-----------------------------MATQEK---LLKSLEVLKTLSAPNQTF------------------------
-------------------------------------------------------DSSKKKDKIQHCHIVTEAISNSTI-
-------KIAPSFPTYLSITIEVLLQLCDDQESDVRMTAGDCLNKVIRAMN-DGNIGKVQIELHKGIK------------
--------------------------------------------------------------------------------
---------------QNGSARSLRAALKRFSQLAHLIRPHKG-KPYVVNLFPTLIKVSQR-PEEQIHETLAN-----SLA
PIMRVLGSFTSEVE---IKDLLKGFLKNISHSSPVIRRSATTCVLNVCLN-CRKPSIFMAYVI-NYLLDLLIPVSDNQ--
----------------SSFLILGVLACLKNLLQHLNDNQ------------------NGDN--ASLSVDKLLQIYELCLH
YFSN--------------KDHNVVNAALETLNVLLQNCSLE------------LRQILLSESGVDKSRISLPTS------
--------------------------------------------------------------------------------
--------------------------------------------------------------------------------
--------------------------------------------------YSMSALRSPS--QLSVATSA--ANDDL---
-FLESE------------LTDT--IRSDIE----KWIDESKLSVMNVPCAKT----------------------NELEKS
LSSE------------------------------------------------------------SKNSSLDVSLAQLDSF
DY----------KISEYVGKSH-------S-VGDNLER-----------------LTISDDSSEK--------SYSYI--
----------EDDKNCETH----FPDVA---IGSFLDTD-ISLVYCARLITKSFLLSGQK-GVCIPDKSVRVSVKSLALT
CLASIVRIYPKILLLCLGKKCKS---------------------------------------------------------
--------------------------------------------------------------------------------
-----------------------------KNHLPIADLILYENHTDPQLRGVFRT--LLSNFITAVLSETHSSYDKWIE-
---SNCCD--GNFARLQLD---S------LGLEDESSGCARQTIISLDVCLEKIAESVNNIHVL----------------
--------------------------------------------------------------------------------
----------------------------------------------PILNCLPLLATNPYWLVKVALCELVSKLPYVTIC
NI-----------------------------------------------TGSS---DFQNRIIDDVLFNFLRNDDARVRS
GAASAIVSVIPFLYH--E---ENAVTAKAIH----YKKLFLSNLCDKNTE----KDLTKKHLIDNMPSPFSQILHER---
------------------------------------------------------------------------------CD
KTEYSLSRIVT-KLYHFLLTGT--------SNHFIYGCLETLSLLSNAYPTTVYTKAWNCKIFQ----------------
-----------------------TEKDNSN---------------SDVTLDLFNICVY-LLS-HSVICYDLTCHLNLLNL
SSNLYAGYALSLIKP--ISESEPS----------------TQPWDMFSSPKFSKLSDHFLSHLVKLLNIFHYVLDDVTPS
-QLQSKPVLPNLSTA---SPIKRRKSDLEKKV------------L----SPSKTPE-----------KE---------DK
DKKDSKGAFLHLPHYMKFYEILRQAYTNYK---------------ITLES-EACVKFSGLLTQTLHSFAVLMEVGTLVE-
--FHAIAEDI----LGYFRFTFTLEASATVECVQQLLKCLFGNNLTSNIGLIRE--VN------------QAE-------
-----------VGEQSNG-FYHNLYQKPYDGVSECFNSFKN--IHKVDCDGDS-T---LMGYLHRRD-AKPLPV------
-RNS--D-KILANYIRIFEPMVIKSLKHYTITSDVRLQCR-VLQLLNQLIQLRVNYCLLDSEQIFIGFVLKQFDYIEKGQ
--ILLASD--LVKKIFQFLVQLSHSKQH--------------SKSIITVPKIIHL-------------------------
-----------------------------------CDGLMASEQSPLTHCIPALEPIVENIFLTRNKS-----N------
--------------------TADAKELETTRDVVLSMLLRLYEYHEVIDLVALILDDSKYCS---------------N--
-SEK---------WLRWSTQV-----------TDAILPMLRQNKIRLDSVE---ALVSLRR----------LIFVLEPSV
FQPVDSVLLLLFQE-PLVYD------------------------------------------------------------
--------------------------------------------NWQFSYTRRLAKILIGLL-VLSPVKEESLIAKINEL
KAEFAPG--SIF--ENCAP-TADPLNVLNSVDI------FREVAPEMIFVR----------------FLFRVLNLASRFC
VEV----------------TRD-GTNDFFIEEISIFLMYCIHIFQS----------------------------------
--------------------------------------------------------------------------------
------------------GSHCKIAIFAISNV----------------NVAQLEDISNNFLK--VA-HEYPIVVFLWSYV
LTILNYNEKKFWGQVADL---------SP------------------------------VSPSINQKILSTGSIILFCDY
MN--------QDVL-KLDQLSWFLTNYV------------------------SQIVHLCDE-DP-----ISEFIS-----
-SVHRNSATS--KIFIDSLMTTN-----LDSKDPVFVLQILKSVENT-HPYHTGTLLKLLLP-KLLISKEL-------AV
SRLVANLASRKIELLLTM-------------------------SMAEVHEQLAKEDLLAIIKKIAALNLVRKNE------
-----------ALSSLLNKLCTQYYDISPLEFD---Q-------KRSVNP---DYIKKL-------------A----IDK
NWYLAQIREKC------------------------------------------NSKETAQLLTRLDYEELCNFLRN--AD
FSKVVFKECLRL--GLDRNK----------------------------------TVEPLITATVTCLSEEVTTVCDHI--
-------------------------QVVLSHLVAYLRFK--------------------------FLTQIYDLIPSVTFY
IDQLPE------TKVSDNS-EVLVKFGVICLESINYLIDRK-------NFNLNYIDLAIHCCESVLKEKKLFGVLNQES-
HISWL-------CSIVNSLYKLVEYLLSDKG--------QL---------------PAISS--SVLQ---------TT--
---PAGEACYQMYSLVTWL-----------------------------YKNS--------DPIVPKLL-FKPIKNIIVSL
SRLSVVNSF-VLIPTQVLK-SGW-TPELV-GTFQTQVPPLP-IE--YLQEIDVLEEFIFRTTLL----------------
--------GWTSRQQFEETWMSLLSVLCNN-FED-----KDSLVVQDVVHASSLAVKAITALLVQTLYFPTPGNTNL---
-------------------SQLIHVSRYPNTP-KSTISNEK-LRKIQDTIERKYRE------------------------
--AGYLPKI-----------GNIFEHTNFE-K--RCKHYSYGQVSVKYLSIAAKIV---------EIDDKCPT-------
-------------------------------ANIWKH-REELLESHGLDINSCLQFLLDYYTQQLKNQGS----------
-TPLRFLHEIVRSTVTISD-------LFTDKSQFSWMLEVFLELSKLHTV-EDELLHQYLIVGISKATAVLTP-DLE---
-----TYETIKKLLTQ-YLKSSFLPSRMACLHGLLYLLEGCKLSNISIGGISEEMQ-IILPCATEYVQCNLNSNNEI--L
KRSQEHT----ILVWTLGFFIVE---NIEETHLESNFISNVLSTAFTVLL--Q-QKPPNNLQIILMKALERLVIFKPTL-
--------------------------------------------------------------------------------
--------------------------------------------------------------------------------
--------------------------------------------------------------------------------
--------------------------------------------------------------------------------
--------------------------------------------------------------------------------
--------TKGISKQIMSLALEKTKT-----ENPNVSILGL------------------QLLLSYMYT------DCSEQL
EAVGS----------------------------------------------------------------------PTNPD
HLVQTIEKISA-IFEHIK--RG-YMSQVEILC-HVLPDILNDFFSP-----ADILTKVISEFLSPQQ-PHPQLLS--KVV
FRVFERAIEEK-----QLPLLQDWVVFSLSNFTQSLSVGMATWCLTCFFISASS-----NEWLRLF--FPYVQTRVGR--
----------------------YEY--EDRKM--LCIAGADFYK-NLT-N-------QNQKDTFIENFRKI-----KEQ-
-PDTLFTDLLSSL-------------------------
>Helobdella
M-------------------------------AEK---LLKAFENMKMFNVADDDSLSFP--------------------
------------------------------------------SFPPKLGSKLKDVAPLTKKEKIQNSNVITDCLTSTHL-
-------RTNPDFSKFLSASIELMLSLSDDEESDVRIVADECLNKIIKSLT-ETHISRIQVELYKEIK------------
--------------------------------------------------------------------------------
---------------KNGASRSLKAALIKFGNLCHHIRSQKC-RPYLVNILPCLSRISQR-SDESIQECLLS-----FMH
NISSILIPYATELE---IKMLMKMFLANVVNSSPCTRRTAGQSLVLICLN-SNFSRSSVIWLF-QQLINDLSKDSP----
----------------DKISLTGWLLAARHLLSYPISNLNASDRHNSVHDYNS----SLSTKQALLIDKLLAQVLELILK
YCKH--------------EDHNVVNASLECLLQFLKHIPSS------------VRQALVSQNGFQLLSHATDLS------
--------------------------------------------------------------------------------
--------------------------------------------------------------------------------
--------------------------------------------------ENKEPNAAATV--INVDVKE------TFEM
PFNSVDEL----------LETQTDLTVSASIND----DQSEVAVEDCDDALNELAAATTTNKSISDS-------------
-----------------------------------------------------------SLSGIAQEINLDFSSV-----
--LPLNY-------------------------SAGVRVSSNL----------T---LNQQDNED----------------
-----CDVSKKLKRVNENN-------DDVDDTGTLYDTTQPPILHLARFLCKEFLLSGKK-STLMDDFQVRVSVKVISIS
CLTFIVEIHPYVLDEKLKRNY-----------------------------------------------------------
--------------------------------------------------------------------------------
---------------------------VDGDVQFMHDVLLYKRHADPHIRGNVAL--LVGMFISSLILNSNLDHNAHRH-
---HHF------EGNLQLK---MLLQVLIEIFNSESSVASKCSLEALQSCLPLLVSSCYGEDAL----------------
--------------------------------------------------------------------------------
----------------------------------------------EIIQHIFQVNSNSYWLVKIELLNLMAVLDYKDIL
HHQKMLPSF----------------------------------------NSKL---VIYDQVL-DMIMTMLGDDDSRVRD
VATSAICQIIMKHFHNMENSHLDLIIKQLTA----GCSNALLKLTHQF-------------PVDKFMNSWMVLFTNS---
------------------------------------------------------------------------------SA
ASFKQFPNIRLKNLGHIPSLNT--------ANVTAAGKTSSTTAPAAATKLKATNESMSAAAGQV---------------
--------------------------------------INECDWCTTSVGGLLPFIISNITS-SSSLAHDMNFHSDAIRL
GGNIFIGLARRRSL-------------------ERAKINSECMWMILNDRHLAQLAEQFFVHLMKMMNIFSLVILNCAIP
--TSTTSTTPSTTSATTIKSHSSLSSSLSM-------PSTAAATATSMVSPIKRKMKLIKDEPMSNTQD-KSSSVNKDLL
SLKEVLGAFQHLQHYQQLYNVLKISHASYK---------------ISGDF--TSDKFCLMLQSTLQVLSQMLDMCSYRE-
--VGRCAEEM----LSYLASTFSIDPVNTLISTQQLLKSLFGTNLISSVGALDQ--PTVSRGMEVLTES--STSPT----
------KTTKRQQENKSD-IFRICFIDHLKWHKQ---------------------NFSKLATTMNES-PDKLLHSF---R
NK--YDK-TSIATFIKLFEPLVIRALKQYTISSAVTLQIQ-VLQLLVSLIKLRVNYYLLDSDQIFIGFVMKQFEQIESGQ
--INQKESHILLSEIMNFLVQLSGEKYH--------------SKPVITIPKIIQL-------------------------
-----------------------------------CDGIMASGLNPVKFCIPSLHYVTKSLFALKYENLS-SNC------
--------------------STGSSEVETQREVVISMLLRVLSHCEALELFILVLKHTQV-------------------E
SIEK---------WNKTSRQL-----------ADVFFYLFKNDKICIENIS---DIKILEA----------LLLNMSSCV
YRPANTLVNLLFSS--HSVN------------------------------------------------------------
---------------------------------------------TISDLNKWLMKSLFAFKALTSYLSETYIEAKKQQQ
--------------------------------------------------------------------------------
---------------------------------KHL--------------------------------------------
--------------------------------------------------------------------------------
----------------------------------------------KQKHHIKPQQYV----------------------
--------------------------------------------------------------SCNQIFVQQAVFCLLSNY
SM--------SN-S-DEKLIVWLLERNI------------------------DRLIALYNNCQS-----VYQFVR-----
-HVHANERLS--RLLCDLTLAHY-RSNRRMHSQPHKIRDMLSCLSRV-HISAVGHVTIKLIT-TMLPHICL-------NV
SYLIEKMCNK----------------------------------------LISEKEVDELIKCLANYS---SKC------
-----------NLDELVVKLKEHMKSGVK--MDKASS-------SLGFGA--VSELRNC-------------I----IDK
DMMFEIIKKKCE--IG-----------------------------------ACRVDDCAVLLASLSYSSIKFIMAS--EN
FNPEVLKSCFDL--VAIQWNLTISRTIS-----------------------------------------SSLSDFSKLPT
PHQLLFIND------------PTHDKYTSDVLLLFKEPQ--------------------------FNRSVNVLSRVLQSY
LNI---LPDA--SEVD----DNVCRLVVLSFELLHFHLIKND------DDEDSDGDNDED-DDEAGD-------------
-LRWS-------EVNN--------------------------------------------KNSNNIEDG-DNN-ENKS--
---FALSVIYHTYYILQFK-----------------------------IFNLGYKN--TQAFSMPTFI-RSPFRRLLINL
SRLPLVNSY-VRTPQPVWR-MGW-NPTCS-HPNATSHPPVP-FS--YLREKQVLIEYICRVNSI----------------
--------GWTSRQQFEETWMSFLGVLNPSLYNEE---ENSTEDCHENVHYQILAMRSITCLLLLTSHTPYPGNPSI---
-------------------GRFLHMPRNQLTSFLKSNIDTDNITIAIDALSSKT-----------------TSKTTSSAV
QVVHSTDNFISN-----------VAAISTD-NTAPIASVATSPTTVKISEKCAKLTATD---N--DSKDDERYIMIRECF
ED-----------------------------FYSFSR-CDCYLIDEPLDVNSCLQLLLDLYGTFISSHSS--NTSSSISK
-VHLNLLLETVRSLLLLSD-------VFVSASQYELMLMSMIDIYKSHPQ-EDELLLSYVVLAICKSASIQGT-EMN---
-----LMFRVQRVIES-CLKSTHLPTKIFTLYGGLYLFESSC---------PENAS-LLLPVYVDYLVKSLGNFSPS--I
IYSQEHV----MVMLSLGFLIME---KYFHIIRDSEFNVTFTKLCFNMVSIYE-DAIPLPLYEAVMTGLERLLV-CGSA-
--------------------------------------------------------------------------------
--------------------------------------------------------------------------------
--------------------------------------------------------------------------------
--------------------------------------------------------------------------------
--------------------------------------------------------------------------------
--------SST-HHIIDH-----------------QALTKL------------------AIEST--SN------DDGDEA
NLMEA-----------------------------------------------------------------------AGGD
RKVQLMERATI-IFDRVR--KG-LPFEANIVL-HVLPNILFDFFEP-----HEILNKIIGEFLYSQH-SHAQLFA--QLL
FKVFDHMLQKN-----QSSLIVNWVMLSLSNFMQITPLSAAVWSLTCIFMSSSQ-----ECPIRPL--FPLVLRRFGQ--
----------------------LDT--FDLQA--FCSSGVSFYN-QLT-KLKSNDMDGSVDCSFVSIIQSL-----AQ--
-DKLPYKLLLESIMQ-----------------------
>Dicdi
M---------------------------------D---LIRGLDILSASPIDTE--------------------------
-------------------------------------------------------DQNLRKEKIEACRTISEQICAPSL-
-------RNTADFPRFLSIAISLLLRAHGDKDLNVYSVAEESLNRTIKILV-YSYHERILFELFKVLKGKPHQHNNEKRL
STNLTDHLSQNSVTPSVPTTPNYQQSPSTQSPSHSTSNSSNNLYNNFSSNSNSNSNSNSNSSSNNNSGNTTPGNNTNNSN
GNANSIFNTANQILSKPFPLKSQRIALIKFGEICSFIRPSKC-RKYILSLVPPINSLLSIIEDESLQESISI-----SME
NISKILIPYLKENE---VHQLIDLFSRNLQQPSAAVRRAASLSITSICRY-HPRPL--FEFTI-EFLYNFTFPNSPPISS
ITSASCIPASSNTNTLQNSKILGVLFSYLQLIKLAEEL--------------------------SSNDIKILDGFSLKIQ
FFVHFILKYIQVPIDGEPYDHNIVGLSLELLQQLLVTFGPY---------------------------------------
--------------------------------------------------------------------------------
--------------------------------------------------------------------------------
--------------------------------------------------------------------------------
--------------------------------------------------------------------------------
--------------------------------------------------------------------------------
--------------------------------------------------------------------------------
------------------------------------------EYSWPKPLVREVIAQLRH-LCFNQQSSIRVSLKAVVLN
CLAQSVKFFPKLFNDEFFKHQPST-IDSNTVTSAEDHI------------------------------------------
---------CRDYLLNISPS--------------------------------------DLNFKLFTPITQQQQQQQQQQQ
QQQQQQQQHNLTSSTMSGINSTTGVSNHTFSLEPKEEFLYYLNDSDPLLRGGTAL--MIGCLIRGYLETDHITSNQIYP-
---TNIAL---LEDNLSIP---TLLIFLLRALMDSSSITAKLACTGISECLPILSQSKFSDWAL----------------
--------------------------------------------------------------------------------
----------------------------------------------VTLRHLLCVSSSTYWLVKLEILETLSMIDYIVIE
YLEQNIQQKSNVMNVVINGPNLSISTSSIKINENNNNSNNSNNNKNNSETGGAVAIPIQSKVL-DFLIEQLSDNDFRVRN
SAGKSLVRVIPKLVFTAPLERHS--MKGIS---------------------------------SKVRETFDV--QDYENT
---------------------------------------------------------------------------VLRKR
KIFANLSHVIG-LLVNQLSNPH--------PDDKIRGCYGALNLICKTYSFPPDTPEQCRTLSSVLA-------------
------------------------------------------NPMLSFVGDILPLALD-RVG-LTWVATDFDVHIDIIEI
LGYLSRGA----------------------------------------ENVLGTYCHNVLRHIVRIINIATNIIQF-RPT
-PP-LKEVKSNPSGIHVNSPL----------------------------------------------------------L
KAPTHLGSFTHSIHYIKLYSKLLTARINSI---------------TI----FGIDRFSQLRQACFETLSVMLKCAG-KT-
--ILPYTEEI----IGYLTTHFEQEPVSVIKCINELFLVTMKPTPIVSISSLSQ--KSRDLNIGGGFISTGGGGGGGSGG
I-NSSSSSLK-QYEPRSI---ESHSSSSNSHDEMFLNSRSVFSSLLTFGTPNLKQHYDFINEVPSSH-NINYSYSNS-EI
N-RIIS-NEDRKLNFKLFEPLIIGSMIEYQTTHSHELKIA-ILLMLSKLSKFGLDLSLFDKENHFPTYFIEELKETHCLL
--SKPNQV--LSYSYDLLGSMFIYRKLF--------------PDSSVSIDDIKKLFFQPPPQQQQQTNQNKSQSLNSTPN
ISSNNNNNNNNNNNNNNNNNNNNNNNSNSSQSLNNSTVIGNNSSHPYSYTIPTIIENCHSFVRYLYDP------------
--------------------NDKYPDTDF-RERFLSFLLSNLQYSQTIDILILIVTIVQP--------------------
NSTL---------HQKFSQQI-----------SHQLFTNLSLGDSPFFIINSIEEVERLYV----------LIDKLHSSS
LSAARWADALLSVS-PQFVN---------------------------------------------------KSTSSSSSS
SSTATSPSSSSSSTTTTTTTSTNTTTTTPSDPLIRKRILLLRESILEAYELRWLPPLLVLLRTGCKLPEEARISAARQSR
FLSNH---------------------------------------------DNKHQPGPSAAII--STLLLKLIRNAVSVF
-------------------SLYKPKNVLFTQLINHLLYYSSIFFNK----------------------------------
------------------------------------------------------------------------NLVPHISA
QSLSNSPNFGATNTTTGSGSVSPLSSSSSSTITVTTMA--------MGSSLMKQPSSSLLLSPTVG-GSSSTINLFMDSL
KGILALDNGTIIQEITTS---------LLSYGGTSTSIHA--------------VKLLLLLGRLPNQQVIEGADLVWKQY
AL--------SNNW-QSCGCEHFLTHHIIFLLYCQSIVVLKSQNIELSETFLDKIVLLINE-ST-----VKKLIE-----
-FLVKGGSNSDQNQYIEIFTQHL-VKIFSRVSNSLDLRKKQKLLRLLSYLPANRETLELLIV-NFLQTDDI-------SL
QVSGERILNLNINNLIETYGPQNSLEIIQELYQIFMSNFVKS-TTNQSVQSLFLKLIKNLSPSSAYQGITPTHNNVIEKL
KEKELTNNNNNNNNNIIEKEEEEKEKEKEKVKEEEEG---------------NNIEKLIQLQIETIKKNNQISDLKTVPW
DYFVELIKSRYY--SNNLNQHS---------------------------------FNNISILSQIDKDATISLLES--KS
LDGTLLPAFISS--V-----------------------------------------------------------------
---------------YSLEFQDEIQAYLLKKVDTLLGLAGEIGTDPLKGGPPFLSDS--------VWDELRETTRCLSNF
INK---------FGLGELCESKL-----LKVSTWAFIESFRRWRAEIINPYDFKLVLELSRSIILKSTASILTITDDSEW
------------CSLLLCLYKLYCLVIRPHFGY------ISGQRELEENFSQD----------------------PTQI-
---SLTQSNEMIKFLVSLL-----------------------------TNVKSYTPMP--GSHIGQLI-FDSFIRAIIPL
STKAFDFIY-----PTVST-SSE-DEFG--GGIIPNCPIFS-SN---VSPEQNIKALVSFIHFV----------------
--------DIDDEFKFKQIWEMLEPIFVSP-LGDA---EMGSDEIT--EECKCLSLSGMATMIIKVCFEVTGVNSQVNLL
ETSTIPK------------STYNHIPREKDLMFLNTPTGKK-LNHLLSTIYGDMPQSE------------LPLGGAIESV
SSSSSMFGESSGNHQNMSSSSLSAYHFNIE-RSFSSNQFGSDQISLSDLR------------------------------
--------------------------------------LFKTPYFIGVNFTPIIQKLLESFESFLVNPM-----------
-CPPMLKKDILKSTVLLSD-------LF-NREQVIWMFKTFTTIYAQDEI-DDFLLKQHLILGICKGIAILQT-PPNVGD
S--NAHSVGIFEMLKS-ALDHQNISLQVSALDGILYLLEGKV---------NKYIQGSLLQFLFRWIPTRLSSVPFP---
--PVSLT----LRVLATMFLMIE---QYSREAEETLFTKRAVTTCIQLG--QQ-QSTPVPIVYGVFRGLDRLLV-SFSL-
--------------------------------------------------------------------------------
--------------------------------------------------------------------------------
--------------------------------------------------------------------------------
--------------------------------------------------------------------------------
--------------------------------------------------------------------------------
--------SHSQRELISHFSLKSLPS-----ENPIRSLLAL------------------GLMVTCIYT------GDETGI
NSPSFTKSSISSIGSGGVNSLTAFEGSFSSSSIESPLNSALDSVMSSFIMDDNYSGSGGNSLINGGGGGDPLSSLDRQKF
SRVNNMEKVKM-LFDKIRLVSH-FSYESHVLS-EVLPVVIVDLFPS----VDQVLSFILGEFLKQSK-TNSKLMC--QII
SKVFDFLVENDTSENTNQHLINYWIIICLQNFFQIQNPTHCLWALTYLFLTSSP-----KRSFKLL--ESEFASKIQ---
---------------------------TNEKL--FIIIASEFYFNKEL-S-------KENKQLFKDSFSKL-----KI--
---EPYISLLKVINT-----TQ----------------
>Monosiga
MVFSLNFWFAPSLSLQFHLSPSNFISLSLSLSLSQTLS---LSNSLSLSLSLSLKLSQTLSNSLSLS-------------
-------------------------------------------------LSQTLSNSLKLSQTLSNSLSLKLSLSLSLS-
-------LVTDEFLKILTVAVSGLLKACADVDSDVRMHADEHLNRLIQALM-DRHLSRLQNELFKAVKM-----------
--------------------------------------------------------------------------------
---------------ESAPTRMVRAALIKFADLVHLLKPLRR-FKYVKVMVPRLRVLLAS-NDETLQETLAT-----CME
KICDATGLYFADDQ---VQDLLTQLLENLNSESATVRRSSTTSAIAVCSG-SSRPLYYLKLFL-NSLFALTPTTHNNELS
HAKE------------QEHTILGALLAFRKLMTEFSIKAQEA---------------VTPD--QLLDSHTNERLFHFLLA
CLQH--------------ESHNVLTGALEALIQQLDSIRGK------------LVHWMRQPERLHE--------------
--------------------------------------------------------------------------------
--------------------------------------------------------------------------------
--------------------------------------------------------------------------------
--------------------------------------------------------------------------------
--------------------------------------------------------------------------------
--------------------------------------------------------------------------------
---------------------------------------------CANVL-SRFILDPKR-RDRVR--------------
--------------------------------------------------------------------------------
--------------------------------------------------------------------------------
---------------------------------------------DQLVRGNVYS--LFGSLIKHSLVHTHLVFSDVPLP
SK-DLMEIGVFGVKPISVL---ELCRLLVEALNDSIATAARSAVAALRYCLPQVLKSTHGGVAV----------------
--------------------------------------------------------------------------------
----------------------------------------------EIHHCILALRHSSYWLLKTELVDLIGETEYLLVH
FLESSSVDLGDS---------ALLPTTPVSMPQRHRN------------LTGQ---TLQDASL-ETILLLLGDADARVRE
ASAACLLKLVSRLFYVEDWPGQDAFTALVE-----RDVAFLTGIASKASW--------------------TATGRDQERP
---------------------------------------------------------------------------ELHAH
VPRANLSRLVA-MLVARLYSSQ--------SKTVIVGMYHGLNVLTARNNVPDIVQRPARG-------------------
------------------------------------------HPPAVQPEDVLPLALA-HIK-LSWIASDLGAHADVLNL
VGNLLRSAN---------------------------------------KSYAAPFVLPLLVHVLRMINMCVHIFDKKVPT
-LNKTTKQERRSTT---SSP------------------RSDAGTT----APSAM----------------DLADDL--SP
LPGKPLGYFTHLPYYIELYQLLHSAYVSNK---------------ITLSS-QSVSKFGHMVRTCLEVLTILVEVEG-SS-
--FHQYAAEV----LQYLQSVVAPEPRAVLLCVHQLIQALFEPPRIMIQTEG---------------------GLEGSLR
V---------DSATLLLG-YYERCID------------------------------------------DSPVTTRRRATG
AK--ADK-EAMFSFVRMFEPLVMRAMNLFTTTASVTLQQQ-IIFLICRLMQMRVNYRVLDKNLIFKTAVDSHYDSIVEGR
--VRKPQN--LLSYMFQFLALLAMHQLRFALFPTLA-YAAQDYPEIVTMESLIEK-------------------------
-----------------------------------ANRLLTSHHLTPRQAIPAFRPLVHELFVVQGHV-----K------
--------------------YPS-AQLQAQQSLLLDSLLQMVSFSAVQEQLVALLKSISS--------------------
DQDR---------YRSLSRKV-----------VDALRSAINSQQVEVRSPR---SLSILHT----------LLQSVAEVA
LSPIELILLDATDVAAAHVMKDLSVHDDEDAC------------------------------------------------
---------------------------------------------------RYWLPQFIALQAVVARNDGHAVQSGLERM
LVKQRLATPDAGNVSERAASTW-------------------------------------------MDLLFRAMLKCSHEL
AHGDAV------------------SRTYTTQQMAQLLKHATAFLERLERDSWLLAAARSAARDAAATITANLQLIVFSDP
LLIMLWSRLLSRVEATSDESVQVFAHDDPKEVLSVIRGASPDWARLLLHLVRERPLRSLLTTMCEHSPPLAMAACELL-G
EAIAEGANWPVAPAEQM---------------------------------SVMQTIDHYLAS---VSNEVALQKLLRIPL
LAIQDDNEEMFAVYLRELGQHKCASSLPIRTLIEAYAPPISGDPA----------PDPKAVIRQALLDVPQGAVETHATS
IARAILELPVDQLR-EVTTASWMPTSMF------------------------RPLLLVTVQ-TAERMAVIKPFKD-----
-SIDADNSSD--QEYMEAVASR-----AGLSDEAASSQI-----------------------------------------
--------------------------------------------------------------------------------
-----------------------------------------------------------------------------TDA
VSKLRVVI-----------------SSCLHTIEHCQTEPCVVHLAV----------------TLMQLHRVSRTCSN--PL
WHYSGLQDCIQL-------------------------DVATLQALLQYWLDESERCLRLLRAQARLTTEHLSATLTGIAE
LLAILSP-EQLVGEQ--------------------------ITTEGARDGHDAASPDGFMVAERI--APMIELMHELRRT
ARFGCFLPDPLT---PQKSYEEQLTLALAEQTEPPMQPPLGA------DLVQRIVLAVRHGFGEALQLEGGCSDLRATPR
L------PAHLRVALNNAVAGLAHAVQMQLHQ-----VGLCCNPETAKPSRHHGEFLAELQGSQGLEMRRQLLEDDLHPE
PGERCRGVCSSLGGMLALLEQLLQQQMVNFHLQCSSAHVAPVITDSH-CPFLNYKRPNFMQSQAGVRL-LLALSSFGRSR
SSLLLQLAH-NASIFRRHS--------------------------------MLLPLQSQYHNTH----------------
--------GLELSTPARQCLNDYLELI--QSIIKKQA-SGDNDHH-----------------------------------
--------------------------------------------------------------------------------
--------------------------------------------------------------------------------
--------------------------------------------------------------------------------
---------------LLAQ-------QVADRTLLQTIHSCLLTLLHEADE-EDYLLLRHLIPAVATAQQALVAVDAQVG-
-----LDEVFFAALLR-GLRHAWPSMQTAALNAVRVAMPSLNVVNH---------EVLLVEVQTYCVTSLTSALSI--SS
SANDEHIPPQSAVLRAVLLLVAEMVVQFRDACVETGFVGRVVSVLASLVEFAS-RELEASVLEALYACLEHMLL-NFVLS
VGECECVRQSIVRANLRPDVDTALGGHVWTFLLAALYTAGHFKLGSEQMQSPAGPQDTSSTMSHVPMEWVDYLTSLPAAQ
RQSASVAVAVVDMLRYCYPARDVLKDLMGRWSRGLSGMVMSSSRLDVVTYMQRLGTQTHFALAVFGNLMTTHGEAVCDWV
AQSLSNYVHSPFVKQVMAALLLAAVPNPVFRALAPRPELRLETADLALQVLTTVCKEVMPEIQLTLALRLEAAGAEAGDA
DDTTNLVVDLSGPPSPDLATDSHATSSNTSLSLSLSLSLSLSHQLSLHLLVLSHTCKAVSWDDAQRGTVGGELSSIGGNI
TDTRLWAKDGRPLYTLRSDNWNEKLGVVSSDKVALLVGSHLEDASTLSPITLRTFLRRAGEYGGYAGVPAGTDLDAQLVD
DKVSIR------------FQTVFLPV-----QDDARQRGALEFCTEAYNYNTHDDSDPRNLLLLCTTQ------GTA---
------------VQQDGRGAKKLYHHACHDGQIHRYWLEAERSSHAVGGAQEETEAERADALARGKATASVIGI--PAMG
TRFNVLMTVQVPLVQKPRSRSR-HDYTMALQDGAAFPAIACSAFPMPGGGAPPCPSISSSSCVAHRGRLRSKA--ACREL
LSGTANAARVS-----RGSQVDTWSGLSVKSPKRQPAPCTVTVVVYYTVAGGVPSPADVKAAVDDL--EALYASCGATGR
LN------------DAEF----------------------DFMKHELTT--------HEHHGVWQKVQD-----------
---EPYKPVPVPVANYNVFPQSS---------------
>Culex
M-------DK-------------------LSVFSS---LQKSIDTLKATGC-----------------------------
----------------------------------------------------------SSKEKIHHFGLISESIVSVRSG
-------VGSANFQNHLSSAVECLLAFCEESDSGVRMSAEENLNKIVRFCEGNGSIVRVQIDLYHEIK------------
--------------------------------------------------------------------------------
---------------KNGNERSLRISLALFGHYCGAIKQRKG-KTFAQNLLPSIYAISKR-SETQVLESLST-----FLK
VFTERLECYMTDGE---VLKMTEVFVEDLAAECATKRRCAAQNIDYFIAG-SRCPEIYANNAF-NRCIEMLLKNQ-----
----------------GQNAALGVLACFRGILPLVLQH---------------------------SSVEKSIETLDLVLH
FLKD--------------GSHSVINAALEVISVIFGNLPAA------------VKQVLLSQDVDHRKFLLKRKTLKNSVF
KINLSESMLSSRK-------------------------------------------------------------------
--------------------------------------------------------------------------------
------------------------------SSTDARMDSLNPRYAG------MSFLQVSSTP---------------TKF
T-PGDDKSLASAS---------------------------------------DFELDSFRSMEFDNSSNFS--------P
EKDP-RSPRSTQPPDTISLKSQKSTDSIGSFINTFLTTSTSAGESVTKFFRKSFDSPVASASAHLPLAD-----QHDDLS
LESLASSQISMQSSTADTIRN-----EL--LLEVDDRTETVSETLQEAAREDEDEDVTEADEVRAETPT----TASIAGV
MEDIVNIGDAPVPEDDDTT---PSRDLF---IGTIHDQN-I-LDYTVRLIASRFLLSGNSCGSLIPDSTVRVSVKAMSLL
IVGQCVQLRPEVMLLPLEKDIPREEFDVVEILNLEDAIAEISNEAILE----------VDEGAAAAGSAEVSEVDGLLEM
KEDHFGECTSSTYFEYFSP-MSISLDQGLTSLKSKLKLVEENFSTMAMDSQDKLSKELDAILSQSDCSGEVARRN-----
--RKELLVVP-RVITVDSGDRAGKRLVGEGVQQMLADVLLYYDHSDQTLRGHVLQ--IVGYFLGVVL-EKHGSLEKFLE-
---GVEKNA-ELDKFIKLD---ALLHVVAKGLLDEIHTVVNQALTAFDQIFAIYCRTRPIGPPPK--LESSDSEFTFKPK
PSENIFN--N----------------------------------------------------------------------
------------------------------TKLP-------TMTPEVLINKLLLVFQNKYWLVQCKVCDAIVNLDFALLR
AV-----------------------------------------------LGAESARIVQDKCLD-QLLLLIKDGDFRVRN
HSGERLMGWIENLAKCGSRVNEGILET--------FVKEYVTASFAE-PIDARRLE--------------------KPSD
VKLFA---------SRAGPV--------------------------FYKL--------------SN--------------
----------------QLLNLGDRNQL--------LGIIHFLRLFVTKCNPFDLLEVWN---------------------
------------------------------------------------EFNLLNVLLSLMSE-HTGTALDLTAQSDLLKI
CSSLMIVTMSSR-TISPA---------------------------------DNEVIDKFIFHVLKIFNIYQHLFTNVKPV
VI-------------------SREKSDLF---------------------------------------------IPQKDL
QLINCFGYFGNDHFYIKLYGLLKNSFESYK---------------ITVNG-DVGQKLFSLLRSTISSLWRLLEIKNITTM
TNGFKFIEEV----LRYLMTFLPYEPEWCVKCTRYLLRFLFTCNFVNRTADVEY--FR---------------RSADSLS
L--HDSDACREFFDQYYDF-----------------------------------------------------------HK
CKSIIST-TDLGNYIKQFEQMVIACLKIYSKTS-VAVQTA-ILELLCQLLDYSINYQLLDSSNVFVECVLKHVELLETGT
--IRGSEV--LIGRIIKFLVLLPHTKDR--------------SK-IVDIPKIINI-------------------------
-----------------------------------CDNMLANGLIRDT-AIASLQVLAHEIFFLNRAV-----D------
--------------------QTNLGEHATQKEVILNMMIKFPEEVRCYEAAPTILLVERS--------------------
--TQ---------SGKYEAEI-----------LNTLLGVIQEGKLLIEGDR---ERMIVEQ----------TLDALGK--
--------------------------------------------------------------------------------
--------------------------------------------------------------------------------
--------------------------------------------------------------------------------
----------------------------------QVLLESNAM-QN----------------------------------
--------------------------------------------------------------------------------
------------------FLKIFFGLEKNKDIDDYQ--------------------------------------------
--KILYYQ------------------------------------------------------LILEKVLLNTEETY----
------------------------------------------------------------------------LMSH----
-VKLFFNKEQ--SFGVDGSGE---------------------------------ALLTRTLN-DILGRS-----------
------------------------------------------IRSSNEVTT-----------------------------
-----------RLLKTMT-KLRKF------P---TDL-------LPRVDV---TQLKQI-------------A----TDE
PWFLEQIAYHCT--GPSYT---------------------------------KSKNVARMLLEVNSESKLINLLSS--AD
FNARLLREVIET--GFDHMLHN-----FRVDCV------LFNPHL------NYLKVHPMLKVALIVLVRKLDEINGTPEE
RWAERTFLNC------------------ARSVIGFLESL--------------------------SRLEHICLIYVEAKF
VDRFIK---DNLLK--SNFFEPLLIFARNCAKLVRNKIATTCL------QNTTILELYLKGIDSTIRQKHLWTELNQNDK
FRDDQ-------ELYVNLSFDVIKHHLRGSPFL------ESYR------------PPEIFS--DLIA--------TRY--
---DQVEVYLQAILIAQYI-----------------------------SER------QLECPEELRSL-LKTVRAVAIAV
LKTDRFYPF-AMTPGEVFN-CYN-LDV---DVEPLRLPAVP-ID--YLYELDTLEVYLKRVSIFG---------------
---------FSSKQQFEELFMSLLVLINREG-------DPDMINYQEQYEIKGMCLRAIVELLLSCYKYPRIGFGD----
-------------------GKFHHVPSNPVIK-CSTVGLKK-LHGIQLLIPLNSVFYQSNL-------------------
ERNLLVTCT-------------DELCAGG-DNAIGTQTFGCNQFSIQYSWHAMEGL------------------------
-------------VNE---------------SLVARN-LRYFIERANLDVLSSVQLIYDIFGQLMEDFFS----------
--------LVLPHLVKFCE-------ICENRDQIRQLYTLVLALQERVPM-EDTLSQQHIIYLLCKMAALLVP-SMA---
-----ELTHLCTIIPT-YLKSTQLYIRDATLAGLICLLECLVTSNTTMGGLSEELQ-LLRNVIVNYIVKHGIIDES--ST
AFSDVHT----KLVWTLNFYLIE---NTSRFVTDCNLLSNSV---ISANNILK-RTTNLEIYLCILNGLDRVIL-TNTA-
--------------------------------------------------------------------------------
--------------------------------------------------------------------------------
--------------------------------------------------------------------------------
--------------------------------------------------------------------------------
--------------------------------------------------------------------------------
--------PRPLLEKIEKLALDLVKQ-----DNEMFSLAAL------------------KLLVACIYH------GSAEQL
EDTERCN-----------------------------------------------------------------GIVQDEPE
IIIQQIEKIEI-LFTKIR--TT-TPQGARIFG-EVLCQLIRDLLPP-----NEILTKVFKELML-NQ-PNPDIIA--TVT
HQVFRSAIDSS-----YLALLQEWLLCSLPNFLSFPQINKSVWCLTVIFLSASL-----NQHLLKL--FPEVLSLPSY--
----------------------QQL--NEREINNFILAARDFYR-KL--E-------PPQRAKFREVFEQS-----D---
--SFVYQNLLQCL-------------------------
>Aedes
M-------EK-------------------LSMFGG---LQKSIDILKSTEC-----------------------------
----------------------------------------------------------SQKEKIAHFGQISEAIVTCKSS
-------SSSSSFQNHLSAAIGTLLMFCEETDSSVRMSAEENLSRIMRFCESNGSIVRVQVDLYHEIK------------
--------------------------------------------------------------------------------
---------------KNGNEKALRVCLALFGHYCGAIKQRKG-KIYAQNLLPCIFAISKR-RETQVLESLAT-----FVK
VFTEKLESYMTDGE---VLKITEVFVEDLAAECATKRRCAAQNIDSFIKR-SRCPEFYANNTF-NRCIEKLIKNQ-----
----------------DQSAVLGVLTCFRGIMPIVLKH---------------------------SSPERSIEILDLVLY
FLKD--------------GNHSVVNAALEVTAVILNNLQSG------------ARKALLSQDLEHRPWLLKRKTLKNSVF
KINMSDSLLGSRK-------------------------------------------------------------------
--------------------------------------------------------------------------------
------------------------------SSTDARIDLLRPDRQ-------MSFLQVTSTP---------------TKF
T-PGDDKSLASAS---------------------------------------DLEMDFSRCMELENTLQMK--------D
SSLE-NEMKHKPIQEDASLKRQKSTDSIGSLINTFLVTSTNAGESVSKFFRKSFDSPASGSTPAREVDNIKRS-EEDDLS
LESLASSQISMQSSNADTIRN-----ELDVMLEVDDSIATETVTLTEHSREKYAPETHEPDTETA--------MASLASA
MEDIV---------EQSPG---AARDLF---IGSIHDQN-I-LDYATRLIASKFLLTGVK-QGLIPDYNVRVSVKSMSLQ
ILSQCIKLRPEVLLLALEKDEPSDEFDVVEILNLEDAINEMSNETLSNE--------AEDNSPENAKMAAVPETEALLEM
KEDHFGECTSSTYFEYFSP-MSISLDQGLTSLKSKLKMVEENFSTMASDSQDKLSKELDAILSQSDSGGLATKKGQ----
-RRKELLVVP---------------------KQMVADILLFYNHADQMLRAN----------------------------
------------------------------SFSDDIHIVVNQALTAFELVFMTYCKHQPYNTQWNRYCESDFISFSLRKT
SITNYFTDQN----------------------------------------------------------------------
------------------------------DDLQ-------KIDLRKMLSQLLLVFNNKYWLVQCKICDVTANIDIKTLG
AT-----------------------------------------------IGEEQARSIEDKCLQ-QIIKLLGSSDLRVRN
HVGQRLIDYIENGSYNGARKNEGIIES--------FVNEHQQTSRCERPKSAVKLQVRTPGLHDYTLNNLSNITHMDGST
ARLFPMHYYIFVHNERSSFVRHDVKQIVIQPRLSDEDDSFFRFIAAFFHLKAKIVYPDKSIVYQSNRCFVYSRARHMPIV
QPS--DAHHFP-SL--YIIRAGEPVLLPFRYYCIWLGIIHFIKQLIVKYNPIDLLNMWN---------------------
------------------------------------------------EFNLLDVLSSLMIE-HTGTALDLTAQNDLLEI
CSTLMIV------------------------------------------------IDKFIFHILKLLNIYQHLLMFPIPA
P--------------------KPPKGDLF---------------------------------------------ANPKEL
QLVNCFGYFGNDPLYVKLYNLLRNLYESYKVFFSTDENHITFNFQITISD-EMSQKLFGLLRTTIASLWRILEIKSISSM
TNGFKFIEEV----LRYLITFLPYEPEHCIRCTRFLLRFLFSCSYVNRLEDIAY--FK---------------KSSQSLV
L--SDTAECRQFFDRYYEF-----------------------------------------------------------NK
CRTIISV-SDLGSYIKQFEQMVIACLKIYSKTS-ANVQTT-ILELLCQLLDFNINYQLLDSSNVFVESVLKHIELLETGS
--IADSER--LMPNIVKFLFLLSHSKDR--------------TK-IINIPKIINI-------------------------
-----------------------------------CDNLLANASIRKT-AIASLQALVHEIFFLYRVAPADRSS------
--------------------ELIMAEVATQREVILNMMIKFPEEVLCYEIAPIVLLIERQ--------------------
--SQ---------VGKYEMEI-----------FNAIIGAMQERKMMIDGGVIL-NATVIQS----------LLRVVDDVF
---KKDLLHHVATF-YND--------------------------------------------------------------
-----------------------------------------SSVSTAGEQIT-NLIIDILYSSIESSQ------------
-IHKEDTQLRDS--------------------------------------------------------------------
--------------------------------LVQLVLIINQI-KR----------------------------------
--------------------------------------------------------------------------------
------------------YPKIKSTVMSTMKIEKLNVS--------SGDYVLQTSILNMLAE--FG-FELKTLTSALEDI
RGTVMYEQ------------------------------------------------------SIADVIRFRTSAVFSTTD
LC-----S-------S--DISYLIDEHF------------------------ITLVSKFD-----------ALLSY----
-YVSSIDYSD--KIVTKTIGSMR---------SMGSTYKQFNLLEKS-NI-RSLSIMTEMLN-ELLGDSNI-------VI
ARRSAIVLDGKLNALLK----------------------TEPLTSENVEKTLPYPKFEQLLNTFSPER-RKRFA------
-----------KLFKTVL-LLVRFYDGLRTP---QDL-------VPQIDT---QSLKQI-------------N----TDE
DWFLDQIGFHCT--TKSYT---------------------------------KPKNIARMLYEVNSESKLINFLSS--SD
FNFRLLREVIAT--AFETMSQV-----FRADCV------QFNPHL------NYLKVHPMLKVGMIVLMRKLEEINSTPED
AHDEKIVLHC------------------VKATICFLENM--------------------------IRLEHLCLIYVEARF
IDRFLK---DHILK--SNFYESLLLFARSCAKFIQSKKQATKM------NDITTVHLYLQCIDLILQQKCLWTELNQNDK
YTEMQ-------DLFIRLTFEVVTEHLRDSLFL------QRYH------------PPELFS--NLIA--------NNY--
---EQVEICLQVLLVAEYI-----------------------------SEKDSID-EEVYLAEHSKRW-LSTMQSVAVSL
LKMDRFYSI-AMTPREVFN-CYS-LDV---DVDPLKLPSVP-ID--YLYELDTLEAYLKRILLKW-QSDPPTEIAEPTWH
LADQRRVV-VGSPPSGTSLVDRVVVPANDRR-------GAGKTNYQEQYEIKKMCLTAISNLLLTCYKYPRIGFGN----
-------------------GKYHHVPRVSPIK-CDSVGLKK-LHNIQLLIPSNSIFYQPNL-------------------
ERKLRMSTN-------------DDGLLTN-NNMIGTETFSANQFSIYYSWQTMECS------------------------
-------------ENE---------------SLTSKN-LKYFIEKANLDVMSSVQLIYGIFEQMIEDNFA----------
--------LVLPLLVQFCE-------ICENRDQIRHLYNLLLGLQERVPM-EDTLSQQHIIYLLCKMTALLVP-TMA---
-----EMTHLCSIIPT-YLKSTQLYIRDATLNGLSCLLECLVLSNTTMGGLSEELQ-MLRHIIINYTVKHGVIDES--AT
TFSDTHS----KLVWTLNFHLIE---TTSRFVADCNLLQNSI---ISANNILK-RTTNLEIYLSILNGLERLVL-INII-
--------------------------------------------------------------------------------
--------------------------------------------------------------------------------
--------------------------------------------------------------------------------
--------------------------------------------------------------------------------
--------------------------------------------------------------------------------
--------GRQLLEKVEKLALDLVKQ-----DNEMFSLAAL------------------KLLVTCIYH------SSNEQL
ENTERSN-----------------------------------------------------------------GIVQDEPE
IIIQQIEKIEI-LFTKIR--TT-TPQGAKIFG-DVLCQLIRDLLPP-----NEILTKVFKELML-NQ-PNPDIIA--AVT
YQVFRSAIDCS-----YLALLQEWLLCSLPNFLAFSQINKSVWCLTVIFMSASL-----NQHLLKI--FPEVLSLPSY--
----------------------QQL--NEREINNLIISAKDFYR-RL--D-------ASQKAKFREIFQQN-----E---
--SSVYQSLLGCL-------------------------
>Anopheles
M-------DK-------------------LNPFGA---LQRSIESLKLADS-----------------------------
---------------------------------------------------------SSGKEKVAHFGVISETIVNVRPG
TST----ANSPTYQGHISNAVAVLLKFCEESDSGVRMAAEENLSRIVRHCEVAGSIVRIQRDLYHEIK------------
--------------------------------------------------------------------------------
---------------KNGNERSLRTALSIFGHYCGTIRQRKA-RTYAQNLLPCIFAIFKR-REPALLEGLCC-----FTE
VFCSHLEGYLTDGE---VLKMTELFLEDIGSDCATKRRCAARNMLAFVQG-SRNADFYANNAF-NRCIEQLLKCGQLQQ-
----------------QSNTVLGVMGCFRAILPIVLRS---------------------------CSVEKAIETYDLCLH
FLRE--------------GTHTIINATLEVLLMILGNVQPA------------VRKVLLSEQCDHRRMLLKRKTLKNSIF
KINPSDSLLSSRK-------------------------------------------------------------------
--------------------------------------------------------------------------------
------------------------------SSTDARSDVLL---RP------GSLPLLTSTP---------------TKF
ALPVDDRSLASAS---------------------------------------DIELDSLKSMDLDAAPALQL-ESSGPLD
GGASGANSSSTVAPDTLSLKSQKSTDSIGSFINTLLTSSNAA-ESVTKFFRKSIDKPLPDDG----------E-EEDRLS
MDSMASSHMS---SNAETIRA-----ELDVTLETEHD--TDPITVVPAPGVPVAP-TPTPSRDTL--------EVPLSTS
M----------VAEELGAE---GTRELF---IGTIHDQN-L-LEFTARLVCSRFLLAGIR-HALIPDAVVRVSVKSLSMQ
IVAACVRMKPELLALPLEKDTFREEFAVVEILNLEDAINELSQQASPSE--------DEPDTANTGTPVPEEAGSELLEM
KEDHFGECTSATYFEYFSP-MSLSLDQGL---KSKLKSIEENFSI---DNNEKLSRDLDAILSQSEPGPGASLAGPQPGP
ARRRELLVVPKRALTAMTISNRKEPPEDEDQQQLLADVLLFYDSPDPTLRGTVQL--IVGNLMRAAV-DRYGSYREFLR-
---TKVPNC-ATQSFLSEH---KLLNVVV------------QALSSVELFFNVYFQSLATGNSRAAKVQKPTTTIPFQAL
S-RNIFLDDSL---------------------------------------------------------------------
-------------------------MVKPAPNLL-------PGYIKTLLDRLLLLSHNKYWLVQWKLFDLIVQLDYGCIK
AH-------------------------------------------------GYQGDQLRDQVLD-QLLAGLSDGDLRVRN
HAGERLLHFLECSAWNDSSVRQKPNRQTKPSVVGDFVDQFVLGTFAA-PFDRRRQD------------------------
--------------------------------------------------------------------------KNLQVW
Q-N--EANIVK-EI--FVII----------FFSLQSGIIHFVRIFMEKYDVFDFVDLWN---------------------
------------------------------------------------EYNLVSVLLSLLLG-MNSTVLDLTVHADLLWI
CSQMIVAVLSSS-TTNAV--------------------------------TDGESMNKFIIHLLKLLNIYHHVYTNTVPL
VM--------N----------RAQKADIF---------------------------------------------MNTKEL
QQINCFGYFGSDHAYMKLYQQVRCSMESYR---------------ISINA-ESGQKLFECLRAATEALWTLLELKSLSAM
TNGMKFVEEV----LRYLQTFLPLEPDHCVRCARFLLRFVFHANYTNRTAEVTY--FR---------------QASLAET
---PNAVASEEFFARYYDF-----------------------------------------------------------CK
TKAKPIT-PEIGAFVKLFEPLVITCLKLFTKMR-PTVQAS-ILQLLCQLLDFSINYQLLDASNVFVESIFKHIESIERST
--IDDSEE--LVRQVVRFLFQLSGLVRE--------------QP-LVTIPKIINI-------------------------
-----------------------------------CDNLLANNVIRRT-AIASVQALSHEVFLLRLSRSSALSK------
--------------------VVEAAECSTQKEVVLNMLIKFPDELDAYCIVPMIMYSERL-H---------------D-G
DGTQ---------AANCEADV-----------LAALLQVLGDGKLVMQCNA---DYFIVRR----------LFECFGRNQ
LLESKVVLRFVEIF-YTT--------------------------------------------------------------
-----------------------------------------IVSESWKSLQK-ITYGELILSQVFQQTEGSYLLNQVG-L
YLHKQHKASEDEEG-----KECESDTARPTED--------VVQPAAQSLAK----------------ILVRYLAECFTVL
DELS------------ITYNPPRETVQFTYDVIERFIGTLNRA-TG----------------------------------
--------------------------------------------------------------------------------
------------------SADVSRALAEQMPLELIRWR--------SLPAPVARRLCELLLK--HG-FDLELMLSLIRNE
EYNVRNDR------------------------------------------------------MVTVLIETLLEHKPNELK
WP-----R-------S--EVSALLASET------------------------TLLSDQFQ-----------PLLLC----
-HIADEEFSK--QIV-KTIMTAV---------EGKLSGVQRTLLEKA-PL-TTLPLMCGRLT-DLLATVNI-------VT
SRNAALILDHKLGALVQL----------------G----AAGLKDSAVLTVLPADDFHHLYSRFNGDC-RRKFP------
-----------KLFKTLS-QLKQYYESVPDEC-LPSA-------LPTIDT---AALKDL-------------P----VDE
AWFLRQVAYHCA--GTSYT---------------------------------KPRHIAKMLHEIKSESKLINLLSS--GS
LNVRLLRDIIVV--AFESMFHG-----FRTDCV------QFNPHL------NYLKVHPMLKVTLIVLMRKLAEAKQKPDD
TAATR---QC------------------AESVICFLEYL--------------------------KRLEHLCLFYIEGKL
IDRFVK---EHLLK--SNFFETLLSFGGVCARAVEQEPA----------QNVTHRELYLRCIGTIVHQRYLWNELNQNDR
YRGDV-------EQYIKLMYRLIEGSLLDEQLL------ARRP------------LPTVFE--RFLA--------AEHA-
---DAMEVYLQAIVIAEFV-----------------------------SDPGAMA-KNLTMSEG---V-VSLVESIAIPL
LKLDRFYPY-ALTPYELYD-CYTSLDALE-GGGTPKLPAVP-IE--HLYDVELLELFLKRCV---------ANKCFPSWY
RVVIANVFGFSSRQQFEELFMSLMVLLNRSE-------DPIFVSLVEQREIKNMCLQAVMSLLLACYRYPWIGFRE----
-------------------GKFHHTTRNPNIK-CDTIGLKK-LHNVQLYIPLCNVFYQPNL-------------------
ERRLLITGT-------------DDLYSLD-DSSIGTVRFDQNQLSLDYFWELIERTTAQ---------------------
------AGGNNSLPVE---------------SLVVRN-KRHFVEKINIDSASSMQLIYDVLKQLIEDDPA----------
--------LVLPHLVNFCE-------MVDNREQIFWLNQLLLKLQERVPM-EDTLSQQHIIYLLCRLAALLVP-TMA---
-----DLTHLCTIIPT-YLKSTQLYIRNATLQGLICLLECLIKTNSSIGALNDELH-LLRNVIVNYIVKHGIIEES--SG
AFSDLHT----KLVWALNFYLIE---HTSRFVPDCNLLSNSI---ISANNILK-RTANLEIYLCILNGLERLIV-TDRV-
--------------------------------------------------------------------------------
--------------------------------------------------------------------------------
--------------------------------------------------------------------------------
--------------------------------------------------------------------------------
--------------------------------------------------------------------------------
--------PRALHEKIEKLAIDLVKI-----DNEMFSLSAL------------------KLLVTCIYR------SCNEQL
ESTERCN-----------------------------------------------------------------GIVQDEPD
IIVQQIDKIEI-LFAKIR--TT-TPLGAKVFG-EVLCQLIRDLLPP-----NEILTKVFKELML-NQ-PNPDIIA--SVT
YQLFRSAIDSS-----YLALLQEWLLCSLPNFLSFPQVNKSVWCLTVIFLSASL-----NQHLIKL--LPEVLSLPSY--
----------------------QQL--NEREVNNFILSAKDFYA-RLEPN-------GSQRAKFKDIFRQH-----D---
--SFVFQCLVQCL-------------------------
>Fly
M-------DKSR-----------------SSAYDK---FVGFVEQLRNTEC-----------------------------
----------------------------------------------------------SQKQKITCFQQIAECIMSPSL-
-------AGHINYAAHCGTATNVLLLFCEDVDSVVRMSAEENLNKILRSLE-KTRVSRILMDLYGEIK------------
--------------------------------------------------------------------------------
---------------RNGNQRSLRICLNLFSYYAPQIKEKHI-KWYAVRLLQCMTTISQR-KETLLQETLCD-----FVK
HFSRHIQQGLSDSE---SCKLFETFLDQISSDCAVKRRCSAQNCMSLIEN-ARNRSLMARHGV-NKVMELLLTDQ-----
----------------QANSVLGALGLLRLLLPQLIRGYPGD-SHEDSESLAG--KKQQQQQTTTSDCRQIIEIYDYCLH
LLST-----------QHTANHAIINATLEVINGILQAVDAASDGQCSQSLGQSLRQLLCNQQLQHNEYLRRRKSLKNQIF
QLKNYEVATSQHQLEDEDENEDVDELVVGATAMQMKKNSNAKLQQAKCREQQQHQHQQQLEVDNSSLGINAGEDAPTEAP
SSVADEGGEPESTKLRCHIRNAARSISECVASDEDKQGQGHRQQRDEDGVVVAEDDDDDDDDDDDDDDMELLSAECDDFT
TLSQLNEQQQALSAALKLPTTTAASSGGAATSQDDKLIDVDADVGG------LPKPQHQSSL---------------QNL
L-AGSDDKSQHLS---------------------------------------DIDNESFNSIDFDAEITIAG-SK-----
---EQQQQH---PPADDSVESGDAT-AIGTFFNNLLSHSNAASESVSKLFRQSSGS---KSTPSKSASTPAPADKSDAIS
AASLTLSLTSLASSNLEPPERQPLIAETPTPVEDSCSITASHTASTALMMDAPAVEVAASKPETPQ-------LRGTPNA
NPFLV--ENSPLRQTVVGR---ALITVK---IGSILEQS-L-VYYTARLVAARFLLSGQA-AGLQPDSISRVSIKSLSLA
VIAQCVRLAPKILQLSLEIS--EQELQLLEEATSQIGSGDSTQVSSPQSSDNSQVGGEKPPLDSSLVPTSLEENLLLLDI
KDDHFGPSTCPAYLQSATPTLSRSADASVLLLE---VGTTSSRSA---KKSEEMLSKSEIIESSYRPTVAVEDVPPLSMP
PRPPKRTKSTRSRVGVLGTSSTTESSSPQS-RQKLSDILLFHDHCDPILRGGVQQ--VVGNFLQSSG---AGLFLDLQR-
--------------GLGLQ---HLLAILLKGFEDEIHTVVIQALNAFDKIFPNVVSKYLTEPPCH--YHAHQQQQQQQKE
QQQQEQDNQKLEQDLQRHSSGQQKRSGQAQTFGQQTFAKDQDNALSSQRQQQRRPNDAGTCANSSATDNDELLAALLNDF
QLQSTGMRQQPKNNSTDIGQSGNEPDLEPNPNAAVEPFCVFAISPKLLLSKLRLCHHNKYWLVQNKYAEVISNLNYVLLR
SYYANFRCAIDNKNSGARKQDSKWPPMDASSVCHSVRDA----------EGEDIVCTYEAQFLA-ELLHLLGDDDARVRE
HAACCLCRFIMQTARQDPSQDQGAGGGGGDD-IEGNGNVNVETQQTNFNLLWDFFDYRIFGSMSVTLRNLFR-----ASS
TIVPPLAELDALATSNSAPSYPDTGS---TSGSSTSTSASSGGSAAAVSAASAYFEASYGIGIAEGHVFALASASQRQIA
QEEKVLAKVLY-RLTNKLMTLN--------DKNVQFGIIYALRLLLRHFNFVDYQQAWL---------------------
------------------------------------------------EFNFVEICISYAYY-NNATAADLGCQNDLIDV
MGKLMAGAMLSSGEPNT------------------------------------AHLDFLLRHSVKMLNIYYHLVTNQRPP
TAGSQSGSSSS----------KQPKSELF---------------------------------------------AREQPA
ATLQALGYFAGDYVYMKLYNILRGANDSYK---------------ITINQ-EAGSLLICLLKTCLHAVSLCLEGMA-SAS
PPELKLIEEI----LHYLTRLINYAPAECVACLRQLLKYLFAQNYASQVRLQPS--AG---------------IGGNGTG
I-GHHAAFMRPYFAAKGRGHGASSTLLPTINSKPAVAVGSQRGAPTDARQPI------DAGPLQDMG-MLFVH-----GL
QPPTPPA-GDCVRLIKLFEPMVIYCLTLFMKSN-ALVQAP-ILRLLSQLLDLNVTYSILDSKNVIFDQVLSNMDLIEGGI
--DRNAFI--MVPPMLRFLVQLTHKSD---------------RQ-LITIPKIISI-------------------------
-----------------------------------TNNLLANGSVRVV-ALLALKTLSYELFFMHSQLEEALDTEGHNSG
RDACQSPLSAAPTPETREALLAQRRELDTQREVVLGMLEKFIEARPSQQVLALLLLFERSVQ---------------Q-L
DTPPYR-------SAQDADAV-----------YGTLCRGLCSRQWRLHNAG---DLRLLES----------CFRNNGNHV
LADSKRFLQLLQLF------------------------------------------------------------------
------------------------------------------IEQGVGNFGD-LALAMVMLSNVILKTEEIYLVNHIK-L
YLKNNPTAERRLQA-----LMPSSPSAAPHWQ--------DEAPSTSSAAA----------------AARAAAASFSAGR
SSIS------------EINYFAKVLCEKLLACLEVLLGLEPSS-SS----------------------------------
--------------------------------------------------------------------------------
------------------HAYCQLTGRFMDALLNVCCR--------SRHKDALQSVFRLVLA--ESEFLCKYYSLLLMSA
AGLVGSHS------------------------------------------------------LDAVLLACLRLVLAMRLE
EP-----V-------ALLEQAAQLPLKT------------------------NLQRALLR-----------EV-CR----
-ASAGCDWSA--QQV-RRLF----------------EGRYLNFLIAD-HL-EFICELCQERP-ECGSLLQVALFRNAHRL
SRQSVRIVLRLLGRLCEP----------------AEREASGDVGSDADPTLQAMQLLSRLHQLYEGER-SLQLPIE----
-----------RMARRLSAQSGQPARNVIYER-LVEGDLAGGEDQDALRT---LLLKDLECRQDNETATPSRI----IDE
SWLFAQLIKFATQHADAPQ---------------------------------QQKQLMLLLLEIQSEPKLQRLLRSLGTE
HEAKLLRHAIAG--SLAAMMSA-----FRQKCI------QHAPHI------NYMQPTPLARVSCALLMSRVASTEATKCR
NPPTGEQLDV------------------ARAVGALMACI--------------------------RNAEQTALIYIDARL
MEKFVV---EHLLR--REHLPQLLAYLGWLAGAAKQILAMPTR----QESEQDALGVLLATVNTLLQQPRVWRELNASSD
PSLRC-------EL-LDLLDSVARCILQDTIFY------RRHRRDRNKAKGPA--PQAIFL--AKLI--------ETQ--
---IEIESLASGRVLAGVE-----------------------------EARLQFAGQDLARF---QVA-LSLVTSIGISL
LRTHQFYAY-AVTPHELIQ-QPG-DQQQE-QQADGKLPSIP-VD--SLSDVDVLRQFVKRLSIF----------------
--------GFTTRQQFEEYFMTCLLLINKLY-------DEHMVDQQEQFQIKQVCLQAILELLMTYKTFPIVGMAN----
-------------------GQFHHTTRWQRIT-CDSISLKK-LHKVQLLVDACNVFYQPNL-------------------
ERQLAY------------------------DNVIGTRTFAPNQYDLNFSWAQMEDQAAAGVGVGVGVGLSGGEQANTA--
-----DIKQSCDADVP---------------DMAMRN-YRHFTQLSGIDFRSSTQLVFDVLQQMIELNHI----------
--------LVLPNLVKFCE-------ICESRDHIKWIKERCLKLQEQVAM-DDTISHQHIIYLLCRSQALLIP-SLG---
-----ELQVLCSLIGNVYLKSTHSFIRIATLQGLLCLLECCSKTNTTMGRLSEELA-LLRSLIVGYINRHGIIDES--PL
PFSVEHT----KLVWTLNYSLIE---WTSKFVPQCHLLSNTI---IAANNFLK-TTADEELYLCVLHGLERMVV-NSGVP
--------------------------------------------------------------------------------
--------------------------------------------------------------------------------
--------------------------------------------------------------------------------
--------------------------------------------------------------------------------
-PPGI------------QPTGKDAAAGE----------------PGAEGSKAGVGV------------------------
------VVTPQMRHKIEKLALELLKM-----ENEKFSIPAL------------------KLLLSCMYV------GSAAQL
ENTELSN-----------------------------------------------------------------GIVQDDPE
IIAQQNDKVDI-LLHCIK--SS-TRDAAWIYG-QVLCQIIRDLVPP-----NEILTKVIKEFLAINH-PHCDVIA--MIV
YQVFRSAIDSS-----YLQMLQDWLICTLPTFLDQ-PEQQGVWGLSVIFLSASI-----NLHLIKL--FPLVLGIGASNS
AAAATTATTATTEAEAAAPAMARKL--GQHEIALFVTAAQDFHA-KLS---------GEQRQRFREAFGSF-----KR--
--SQVYGRMLQCL-------------------------
>Brugia
M--------------------------------DR---LSKALNVLQTARKSDWMTAP----------------------
------------------------------------------SKKSEVCEKEYAAFSDIKDVLIRSELWLAVCIFDKSVK
LN-----RKDPKYNDEFSRAVEVLFEYISHRNSDLRMLSEQTMDSVLRHLVIDMNTSRVIVLLISEIK------------
--------------------------------------------------------------------------------
---------------RNGTSRSLVFALSRLLDALKYVKVNRS-RAIGVHLVSALPKILIR-SEEIVQHALER-----YLP
PVFVFLGPDFETQPNDIVSKLYEAALSNLELPGVTNR-AATVIIS---QL-ATYVGVIRRKVF-LHFLKVLSKASEQQ--
----------------NRNLLVGTLNSLRLLWSVYLLRSS------------------------EYELDSLRSVIRGSLR
CLFS--------------PQNEIVVASLEFLEKVVSSPLAA----------------LDVESFYPQRSNT----LNSDVE
KQNIA---------------------------------------------------------------------------
--------------------------------------------------------------------------------
----------------------------------------------------------VPTSLPSYATS-----------
--------------------CMSSLRASPIN----------FPFGNLPSEVVDVADSSVQP-------------------
----------------------SFNFSLRTGFSSLKMQNESNSESG----------------------------------
-----------------------------MDIIDPLRHLEISGDLTECSSEESFPEF-----------------------
-----------TSVSSIPIPEYLPIDIS---FGSF-------LAYTAVLLAKRFLLSGQC-FKLLADSEVRVSHKILAMS
CLSSLALYLPQFADITLHPKGG----------------------------------------------------------
--------------------------------------------------------------------------------
-----------------------------LGAQTLRDLQLYLNHEDDQLKAAAIT--VFVNAEKCRFRALGQQFHVPSSF
ILKRNLSGKLGTFNCNVIEFSCSFTSFVYDAIRVRRAHCSRALLIALKSAKELV-------------YQTG---IVY---
--------------------------------------------------------------------------------
----------------------------------------------DVAKFACENYQDNYFLLRIAVVEYLASIEWAFAS
S----------------------------------------------------SCTHLPDEIF-EIYMHLLADDDQRVRN
AAAKHLSLLTENANYNS-TPNNIALEEPADY--------FCSDFPKNSLT------IGMSPHYDFLQQPFNFL-------
--------------------------------------------------------------------------------
-IAGNLSYILR-KMFYILTTSA--------NEKQQAGIAAGLFQLLCCFKSRHYAQAWGLE-------------------
------------------------------------------SNVDSSRTGLITALIS---K-CDCCCTDVQTFIHFLNI
VTHMTAGLYTVNIMKAANGSS----------------------DVVLKFPKY-SIYEQLILLQLRVINLYYCLITDHRQQ
-------SACSFSRFSPLSPVRKALPV----------NTNSAASWEQRIT---------------------AISTFAGID
IKMSRNTSFLQSSSLIHFADSLKGGYFNYM---------------NTLAF-DASERFTALLISALNCLACTLEVMRLPQ-
--VADILEEVVTKVLFYCQTVVEIVPDESIRVAMQLFKILFGSNVANLSLDA-----------------------LRSLK
L-N--------DINQPKD-LLEVCVLRSVDFFTEFVINTG-----RVENDEAQ--------LMRYVL-FSFLQDL-----
KDGIPAS-MEITPYVTMFEPYVSLTIRLYQSTNSVDVQCS-VLNLICVLIRGGINYSMLDPETRLLDFVTEQVNEISTRN
WVAADAEK--LLTSVFNYFLSLYHTESQ--------------GQVIMELDKIRSF-------------------------
-----------------------------------VELLMKACNTR-PYLTPCLQIVLVDCIIMRLSFD-----------
--------------------VTLLKILQTTNQLAA------VCPTRVLQLWTLAVLGSHV-------------------N
GDAN---------WTKTSLFL-----------FESLQQLDAENWDFSTTFN---AVLLLRS----------CYSSIT---
-RPTDAFFKKMISI-LE---------------------------------------------------------------
--------------------------------------------DDLCCFSRLL-LVLPYLFIFFCVLKDGSTFTRIEQI
C-----------------------------------------NHDAEKIGR----------------LLMTILGQCLQAL
RRLTSLDNINEKNS---------------ENLMVWYLLILSHAVRS----------------------------------
--------------------------------------------------------------------------------
-----------------------ATNFSCFLVQIDHIL----------------------------LDIICRQLGDLCMI
MRCRAASPD------------------------------------------------------------GAGEIARLFDF
CC--------PDILV-TVVVRRWLACHI------------------------SDL-------------------------
-----GIEMQ--KTLLKSVIDLS-----KNYRSCATDLDIIELIASS-DIPEASIAIEFLKNKLGESRI----------L
DRLTALLLDHQSESVAS----------------------KALLKHFITSEQFSADFLFGCSEEIPELSNKKRSL------
--------------------------------------------------------------------------------
-----------------------------------------------------QIGDPSRFTPEVFADILLQIIDRKSQK
PESIVYKKASDW-----------------------VTEISLFDHW------MQRYIDSLAIQSESRTSEVACAVAFGITR
RSFREII-----------------DQAQNSKKVVEQQLS--------------------------LAVSVAR--------
--------------LDSEFVFPFIIFVFCFGKIDCALCV--------FERCSILSYQGLQKLSDPFCSMKIIDRTGKKDF
DIDFF-------SDAIRTAFDVTQKIQENFRKK------RQK----------------TRLYTHLERLAKGHCGISYYC-
---NIINFMIDISSFVH--------------------------------------------ISVYSFLFSTHICEEAKAV
SRLPFLNDI-SCIPRSAIL-CGW-KPEPEIHRASISIPTVN-IH--YLGNVDILHDFVWRILWA----------------
--------GWNRRSNFDNFSMSLFGVISSTPSGSELT--SANMNMTEQLVASTVAVEGLTNLLLETLLYPERGDPVT---
-------------------GRFIVKPRDVSPDFLSSSYGQR-VIMLQAKLLGASAIDS----------------------
-----------------------IHKKNLEILNDRGRKYRPGQFSVLTSWNMAGILEQE-------RNLYKDIMQISG--
--QSDERLPSSDS-------------------------SYLLNSGHDTTYESCLRMLFDTYSHWFRSGMD----------
AVPLPLLSATVKSMSLLSD-------LFTEMDQYRFVFGHMKTLFSIRSC-LDNVDIGNIIYSLLKCVSILGI-EDSFIP
K--VDAQKIVLTWVET-GLTSEFTEIRIKTLQGCLFLLQAISF---------DELK-AMICEKFAAV-------------
-------------------------------------------------------TTPGWLMNLISVGIEKLIV-GSRI-
--------------------------------------------------------------------------------
--------------------------------------------------------------------------------
--------------------------------------------------------------------------------
--------------------------------------------------------------------------------
--------------------------------------------------------------------------------
--------YVLTFSRVAVQALENYFYV------PQKFLYAL------------------RIFIVCLYR------GLEEGR
VQH--------------------------------------------------------------------LGIQPYDPR
--IHLMEQHAM-IFKILA--EG-SEGDASQLM-KVLPYLLIDSLNQ-----SELINSILKELIHRYAGPHPRSAAIFRII
HHWFIVLHSRE-----AENVVLEWTLNGLESFKYVVDPALFRFYVSAFLCSSSP-----NPCIANL--FYLVIGRTSN--
----------------------LVR--IDDFL--FEFSVQSLLL-RMEK--------DARNGLRLSMEKFV-----LNGK
TCRDPRRIASFPQL------------------------
>Q623B6_Caebr
M------------------------------TSTV---LAQITDELGTNLSSD---------------------------
----------------------------------------------------RELHLIKSAHRIIDKNLNLTVLT-----
-------DRNDTYHRYVHRLMNITFLSLEKSNADIRLAAEAYFEHILKAYECYGYPETSLKLLAMSIE------------
--------------------------------------------------------------------------------
---------------RLTGARQVTKVIKYLSYYLDILPRQRTPEKSGRTFHQEVVKTLILRSLDIDQTICHQ-----ALE
KSCDKLISAVIWQMVD-LKEIAEKTLQKLWNSRGHASRTMAALLGAVMDA-SGE---TFKLTFHFHLEKVIDQFVS----
----------------NKPVPVGAISLIKRCFGQYAK---------------------------GISQETLQGSTEMLLL
MIR--------------DSSNEVAYDAFAALEELLKADCSQLAGFVPGRF------------------------------
--------------------------------------------------------------------------------
--------------------------------------------------------------------------------
--------------------------------------------------------------------------------
--------------------------------------------------------------------------------
--------------------------------------------------------------------------------
-----------LRRLHGSTTSESEEAPDPSEFVDPLMNADLYEELQETLPPP----------------------------
------------------KVDLFLEAFA---KIT-DES-SSVNHYAAAFLGKHYLLTGHG-RLLKTDRQSKDSMKILAIR
VLNVICAQEPLNKFIVK---------------------------------------------------------------
--------------------------------------------------------------------------------
---------------------------IGDKSQHLIDIIEYSTSSDDQLSQQAIK--LMFLELKRGVDFGGLD-------
------------------------------------CLAVFKSVKKYRYLLESVT-------------------------
--------------------------------------------------------------------------------
-------------------------------------------------------IDHMDHLHGTELLEFLEIMAFRSLH
TAHYDL--------------------------------------------------GIPEITSACSFMGVIRDWMMTRGI
KDKKYKDMIIR----------------------------FQDFLKICINECWNLPRFV----------------------
--------------------------------------------------------------------------------
-----------SAVPSFLTPFGKD------------------VPIDDQYPPSLPLRMNLLTVKRP--TERGHDLQPNNYD
DWRGCLLAEASMPTIIKMKAILRENIVSAEYMSANETQWSRMQW----NSDVLPPILQ-LMA-ISLAD------------
----------------------------------------------------DPSPEDCYHGFHVGMSILNWVYRNVFIV
RGAAETKEFPFLQHSRI---------------------------------------------------------------
----------EMDNVLGNRAEFRALLDAYY---------------KTVQS-AADEKLEQLLTPTVNMMMAAMERD-FKT-
--STDNVLEI----IAYIKTLFTLSSISALKLLHALLRSLLNPKLIESLTRGKV--F-----------------------
-------------------YFESSNTKTFSEKDEYLVE-----AIKCKGDKYFNHW----------GEDMDVE-------
--NVRM-GAMTEEIMEQLEPLITQSLKCFRFRGNPE-KEQ-VLQIMICLMNHKLKLSDADPTDCLMKLAVSTFARPEECI
--DPQLFE--T--------------LMHFLATATRFQVEERYQKPITAATMLMKA-------------------------
-----------------------------------------IGKLSEASVHCAMKAVSFAVHNGRFE-------------
--------------------GRDVDELLKTPQTTWNRCMSFAPTETLYTLSLLL--EKNGST---------------IKN
KELF---------WTTLSKWL-----------EQNHGNDRNVP---------------------------------FPAI
AFPVTILSDYLLSD------------------------------------------------------------------
------------------------------------------EVNLFEKMDQWLVN------------------------
--------------------------------------------------------------------------------
--------------------------------------------------------------------------------
--------------------------------------------------------------------------------
--------------------------------------------------------------------GNTSNIQGRCIF
IAALYFS-REK---DRDW---------RRYLKYVLENGKGSQAAEYLLDYADRELIEEITEEDLYDPKL-----------
--------------------------------------------------------------------------------
----------------------------------------------------EGGINDLVVE-RLRDQHFCG------SY
QDLCHSIICLGEASVL--------------------------DFIDIVEKEWPYDDW-----------------------
-----------MWALLVSEFQRLDD-------------------------------------------------------
----------------------------------------------------DPEHRLDLTYRLQDLAESLAERFN--SD
VYLKFLANTENA--GLDLSCLNMTQVKFILDQA-----------------------------------------------
--------------------------------------------------------------------------------
------------------------------------------------TPGCLDKGYVLRGVRNLIYHPRMAQLIAEDEL
GTAKMLMKLAENVSGIPVNNALLASYSQYRVDF------HVKGEMDDRRVREI---------------------------
-------KKLTQSIFAISQ-----------------------------EVNLR---------------NPKKLPKALAAC
FRHPILNSI-FNIPIVAMKCFNW-IPVVE-ILRKPSITCLPPTG--HVCDVIVLDDMRNRLRKV----------------
--------GFVTNAQFEVLFTTMQAVIAHTVIGPEK-LDHDTKDAMEREERSCNALQMYIATILNSMKYPIGGDPYS---
-------------------GFVLKSPYTSEL-FLKSSEFAH-LCNLKSAWKCEP--------------------------
-RTAFTTPLERH------------DQLKWRKCDGKTERYGICQTPLFSLWQLCGMMPI-------EFKQHANY-------
-----HRIDHSAS-------------------------NYFLTSATNIDTISNVKQLMNIFEYWYSQGID----------
ELGENLLYTILQSILHLSD-------FFDDPDLHKAVLRTTSIIYRREYD-LNPLLASYVYIMFLKSISVLGA-DMNGLE
LKPGELEAITMKLVIA-GLGHTKKVVRIHTLAGLLYLVQSDS---------YESFM-PSIDLLSTCLERYLKKLANGT-S
KVQTDET----QFVLALVVKLLE---VPIRLKQDKKT---LLKLLLAAMRVRK-DRF---IIELIAEGIEQLLC-RSNE-
--------------------------------------------------------------------------------
--------------------------------------------------------------------------------
--------------------------------------------------------------------------------
--------------------------------------------------------------------------------
--------------------------------------------------------------------------------
--------FNGNVINFLLAGIESPEPIPFPLDHPYYCRAVY------------------RILMVAATR------AKVAND
EMSM---------------------------------------------------------------------------T
RIYKALQK--L-GFDLLKRR-----SCCPAIT-RTLPFFSICINGV-----ENTIASYIEAFMVNGNNIQAR--------
------------------------HGMSLMNQIVETAATSKKWTVE----------------LKAV--REKMQSKRES--
-----------------------LDE-HNQLL--LNILCSKLID------------------------------------
--------------------------------------
>Caere
M------------------------------TSTV---LAQITDELSTNLSSD---------------------------
----------------------------------------------------RELYLLKSAHRIIDKNLTVNVLT-----
-------DRNDTYHRYVHRLMNITFNSLEKNNADIRLAAEAYYEHILKAYECYGYPETSLKLVAISIE------------
--------------------------------------------------------------------------------
---------------RLIGARQVTKVMKYLVYYLDLLPKQRTPEKSGRTLHQEVVKTLILRSLEINQTICHQ-----ALE
KSCDKLVSAVIWQIVD-LKEIADKVLQKLWTTKGHASRTMSALLGALMIE-SKE---TFKPMFHAHVEKVIESYVN----
----------------NQTVPVGAISLIKRSLVYYAN---------------------------GLTETTLKGLTEMLLL
MIR--------------DSSNEVAYDAFAALEELIKTENNQLNAFVPGSF------------------------------
--------------------------------------------------------------------------------
--------------------------------------------------------------------------------
--------------------------------------------------------------------------------
--------------------------------------------------------------------------------
--------------------------------------------------------------------------------
-----------LKTTYGDNTVEIEEPSEPSEFVDPLVNADLYDQLQETKPPA----------------------------
------------------KVDLVLEEFE---KIVVNET-PSVINYVAAFLGKTFLLTGLG-KLLKTDRQSKDSMKILAIR
VLNVICARRPLETFVVR---------------------------------------------------------------
--------------------------------------------------------------------------------
---------------------------VGDKTQRLVDIIEYSTSTDDQLSQQAIK--FMFLVLKRGTHLD--E-------
------------------------------------CLSVFKSVKKYRYLLDSVT-------------------------
--------------------------------------------------------------------------------
-------------------------------------------------------VEHILHLHGTELFEFLEIMAFRSVL
TTRYDL--------------------------------------------------SIPEITSACGFMRVIRDGIQKNKM
EDDAVSGMITK----------------------------FQDALKRCIIDCWDSPRFV----------------------
--------------------------------------------------------------------------------
-----------NAVPTFLSCCGND------------------VILEDLYPPSLPLRLNLISGKRP--NQKADNLQPNIYD
DWRTILISETLMSTTVKMEGILRENVISPEYTHEKVAQLSRMHW----NSDTLPAILQ-VMS-VSLTD------------
----------------------------------------------------SPTKEECYHGFHVGMSILNWIYRNVFIV
RGAAETKEFTFLQHSRI---------------------------------------------------------------
----------EMDDALGNRTEFRATLDAYY---------------RSVQS-SADEKLEQLLTPTINLMMASMANN-FRT-
--STENILEI----IVYIKVLFTLSSLSALKLLHALLRSLLDPKLVESLTRGRV--F-----------------------
-------------------YFESSNTISFNDNDEFLVE-----ALKCKGNKYFNRW----------GDDMDLE-------
--NVKM-GFMTATIMEQLEPLITRSLKCFRFRGRFE-KEQ-VLQIMICLMNHKLKLSDADPTECLMKLTISAFARPEECA
--HPELYE--T--------------MMHFLATATRFQVDESYQKPITAATMLMKS-------------------------
-----------------------------------------IEKISEENIPHAMKAVSFALLNGRFE-------------
--------------------TNEAKEFLKTSQSTWDICMTYAPTETLYSLSLLL--EKKKDH---------------IAN
EGLF---------WSVVSKWM-----------GDDIYHAQRVP---------------------------------FSAV
ALPLALITDYLISD------------------------------------------------------------------
------------------------------------------DVKVFETIDDWIQQ------------------------
--------------------------------------------------------------------------------
--------------------------------------------------------------------------------
--------------------------------------------------------------------------------
--------------------------------------------------------------------KNTKNIDAKCAL
IAVFYFS-AQENMGDTDW---------KTYIQYVLDAGKSTKAAEYLLKYADQSQICEIEEEDDFEDEL-----------
--------------------------------------------------------------------------------
----------------------------------------------------RG-TSISAVE-ELLGKHFCG------SY
QDLCHSIVCLGKTAVI--------------------------DFIDLVEKEYPDDDA-----------------------
-----------MWALLVAEFRRLDD-------------------------------------------------------
----------------------------------------------------DLEHRLDITFRLQDLAELLAERFN--TD
VYLKLLANTKNA--NLDLGCLNITQIKFILDQV-----------------------------------------------
--------------------------------------------------------------------------------
------------------------------------------------TSSCTDDGYVLRGVQNLITHPRMFQLISEDEL
GTAAIFIKLAEKVTGIVVTDALLASYSQYRVDF------HVKGDMDDRRIKEI---------------------------
-------KKLTLSLFALCQ-----------------------------ETNLR---------------NQKGLTKTQSAC
FRHPVLNSV-FNIPLVAMKCFNW-IPVVE-IVRKPTITCLPPTG--HVCDVIVLDDMRFRLAKV----------------
--------GLVTNAQFEVLFTTMQAVIAHTVIGPEK-LDHDSKDAQEREARSCNALQLYIATILNSMKYPNGGDPSS---
-------------------GFVLKSPYLSEL-FLQSTEYAH-LCNLKSVWKCEP--------------------------
-RTAFTTPLEKH------------DQKMWKHCDGKTRLYGICQTPLFSLWQLCGMMPI-------EFKQHANY-------
-----HRIDHSAS-------------------------NYFLTSATNIDTISNVKQLMNIFEYWYSQGIA----------
ELGEALLYTILQTVLHLSD-------FFDDPDLHKAVLRTTSIIYRHEYD-QNPFLSSFVHVMFLKSISVLGT-EMHSAE
FKPGEPEAIALKLVSS-GLVNDIKMVRVHTLAGLLYLVQSDS---------FESYM-PTIDIMSSYLEKYLRKMANGT-G
RLESDES----QFVLAVLIKLLE---VPIRLKQDKKT---LLKLLLATMRVRR-ERF---IIELIAEGIEQLLC-RSNE-
--------------------------------------------------------------------------------
--------------------------------------------------------------------------------
--------------------------------------------------------------------------------
--------------------------------------------------------------------------------
--------------------------------------------------------------------------------
--------FNGDVINFMLAGIESGDPIPFPTDNEYYCRIVY------------------RILMVAATR------AKVAND
EMSM---------------------------------------------------------------------------T
RIYKALQK--L-GFDLLSHG-----ETAPAIA-RTLPFFSICVNGV-----ESTTTRYIETFMINGGDTDVR--------
------------------------FVVSLLNQIVETAATSKKWSVE----------------LKSV--KEKMQSNAGS--
-----------------------LDE-HNQML--LNILKNKLIN------------------------------------
--------------------------------------
>Caeel
M------------------------------TSTV---LAQITDELSTNVSLD---------------------------
----------------------------------------------------RELNLLKSAHKIIDKNLKVNVLT-----
-------DRNDTYYRYVHRLMNLTFISLEKNNADIRLAAEAYYEHILKAYECYGFPETSLKILAMSIE------------
--------------------------------------------------------------------------------
---------------KMNGARQATKMIKYLVYYLDILPKQHAPEKSGRTFYQEVVKNFILKSLNINQTICHQ-----ALE
KWCGKLISSVVWQNAD-LKEITEKALQKLWSTRGHASRTMAAVIGAVIEE-SKE---MFRVMFNTHLDKVIETFVS----
----------------NQVVPVGTISMIRKSIHIYIS---------------------------GISVDSLKGLIEMLLL
MIR--------------DSSNEVAYDAFATLEELMKVEIPQMDGFVPGNF------------------------------
--------------------------------------------------------------------------------
--------------------------------------------------------------------------------
--------------------------------------------------------------------------------
--------------------------------------------------------------------------------
--------------------------------------------------------------------------------
-----------LKLKYGESISKPEEHVEDVEFVDPLVNADLYEQLQETKPPP----------------------------
------------------KIDLLLEDFE---KMSLNAN-RSVTNYVVAFLGKTFLLTGSE-KLLKTDRQSKDSMKILALR
VLNVICARTSIENYEVR---------------------------------------------------------------
--------------------------------------------------------------------------------
---------------------------FGDKNQLMIDVICYSTSTDDQLSQQAIK--FMFLVLQRGTEIY--N-------
------------------------------------GLDLFKSVKKFRYLLDSVS-------------------------
--------------------------------------------------------------------------------
-------------------------------------------------------VEHVLHLKNQQLLEYLEIMAFRSLY
STHYDF--------------------------------------------------SLAEITSACAFMSVMRDWIQVNNI
KENKHLEVMER----------------------------FQNCLKNCVIDCWDSPRFI----------------------
--------------------------------------------------------------------------------
-----------NTISTMLNYHSSE------------------TACEDQYPPSLPLRVDFPHVHRT--SSKANRFKQIVYD
DWRTTLLCEARMPTYVKMTAILRESVNSPEFSHEKVPKLSRMHW----NSDTLPAVLQ-VMT-VSLSD------------
----------------------------------------------------SHSKEDCYHGFHVGMSVLNWVYRNVFIV
RGAAETKEFPFLQHSRT---------------------------------------------------------------
----------EMDDTLGNRTEFRATLDAYY---------------KTVQS-SADEKLEQLLTPTINLMLAAMAHD-FKT-
--STENILEI----IVYITVLFTLSPISALKLLNVLLRCLLDPKLIESLTSGRV--F-----------------------
-------------------YFASSNTNNFETNDEFLIE-----ALKCDGDKYFNRW----------GDDMEVE-------
--KIKM-GAMKEEILEQLEPLITQSLKCFRYRGKNE-KKQ-VLQIMICLMNHKLKLSDADPTECLMKFAVSTFARPEECA
--HSELFD--TVRAIQKLLAEAYFQLMHFLATATRFQKDESYQKPMIAATMLMKS-------------------------
-----------------------------------------IEKLSNPGIVNAMKAVSFALFNGRYE-------------
--------------------FTDIEEFLHTSHSTWKLCMQVAPTETLYTLSLLL--EKNEFG---------------MKN
QKLF---------WSVLREWT-----------PHDSLK-VEVP---------------------------------FSAI
ALPVSLITNYLTSD------------------------------------------------------------------
------------------------------------------KVNIFEIINQWLDD------------------------
--------------------------------------------------------------------------------
--------------------------------------------------------------------------------
--------------------------------------------------------------------------------
--------------------------------------------------------------------PVPENTLKECTI
IVALYFT-LNNGDRAIDW---------KRYFEHCFSKFNNTKATHLLSKYADSSLLPNRVEESDLDEEL-----------
--------------------------------------------------------------------------------
----------------------------------------------------TGN-DSVDID-NLLEKHHCG------SI
QDLCHSIICSGETSVL--------------------------DFLNLIEREYPNDDS-----------------------
-----------IWGFLLAEFRRLDD-------------------------------------------------------
----------------------------------------------------DLEHRLDITFRLQDLVDALSERFN--SN
MFLKLLGNTNLA--GIHLNNLSIPKIKLMFDQV-----------------------------------------------
--------------------------------------------------------------------------------
------------------------------------------------SFDYTEDGYVLRGIRNLLVSPRMLHFISEDEL
ETAQMFLNLAEKVAGIMTTDALIATYSQYRIDF------QVKCDMDEAKVKEI---------------------------
-------KKFALSMFAFCQ-----------------------------EAHLR---------------HSKRFSKTLSAC
FRHPILNSM-FNIPLVAMKCFNW-VPVVE-ILRKPTITCLPPTG--HVCDVMVLEDMKRRLSKV----------------
--------GLVTNAQFEVLFTTMQAVIAHTVIGPEK-MHHDEKDVLEREARSCNALQLYIATILTSLKYPNGGDPSS---
-------------------GFVLKSPYISEL-FLQSTEFAH-LCNLKSVWKCEP--------------------------
-RTAFTTPLERH------------DQKSWTHCDGKTNLYGICQTPLFSLWQLCGMMPI-------EFRQHANY-------
-----HRIDHSAS-------------------------NYFLTSATNIDTISNVKQLMNIFEYWYSQGIG----------
ELGDTLLHSILHTILYLSD-------FFDDPDLHKAVLRTTSIIYRHQYD-QNSVLSSFVHAMFFKSIAVLGA-DVHGTE
FKPGEPESIALKLVSS-GLSNDIKTVRIYTLAGVLYLVQSDS---------YESFI-SSIDILSAYLEKYLKKLANGS-G
RVESDES----QFALALIIKLME---TPMRLKQDKKT---ILKLLLASMRVRR-ERF---IIELIAEGIEQLLC-RSNE-
--------------------------------------------------------------------------------
--------------------------------------------------------------------------------
--------------------------------------------------------------------------------
--------------------------------------------------------------------------------
--------------------------------------------------------------------------------
--------FNNEVINFVLVGVDSGDATPFPADNEYYCRAVY------------------RILMVAATR------EKVAND
EVSM---------------------------------------------------------------------------T
RIYNALQI--I-GFDMLSRG-----ETAPAIS-RTLPFFSICVNGV-----ETTISKYIERFVINGNKKDRR--------
------------------------FVSTLINQIVETAATSKKWSVE----------------LKLY--RERLKSKSVA--
-----------------------NAD-DNQWL--LNILCNKIVE------------------------------------
--------------------------------------
>Naegleria
M-------SQTPGGVGVSNNSNPSTTLLGSSSQQQPTDINSSLNILQEKIIYIDDDQPTSS-------------------
DSSDTQQRKKQIQQAITNISEFFIY----------YYQQECKFNLLDSSSGSSST-----------ATATNNTNNSTSNN
TSNNNLEIFYKNVTNFLNISIQQLLRGCGDVSESIRTFSNEHLRKVIKSVI-DTHSDRVLVILFRCMKP-----------
--------------------------------------------------------------------------------
---------------KANNKYSIISAISNFANISHYIKPQKC-RTMVSFILPQLIQFISM-EFDYYSTILENIIMNGSLD
KIFDILGPYIESNE---IYDFCKDLYKLLSHSEVEIRRACAKCISSCCAFIPSCPIHQIALDIFNLSNNCFDRNQT----
----------------TTTTIHDNITNNLDPTTTTT----------------------------TPNTTASEGVKKMKAS
E-----------------SNSNIECTDIKTLQGILNTFLNLLVVL-----------------------------------
-----------------------------------------------------DELKTNNIEYQTYSNIICDLLIDCLTI
QDQRILSPSIE---------------------------------------------------------------------
--------------------------------------------------------------------------------
--------------------------------------------------------------------------------
------------------------------LLTNLLSKFSNYCKNWNRGKVNSLLSKIIY--------------------
--------------------------------------------------------------------------------
---------------------------------------------------------------LLSVQSVLVTVKSYVLE
TLQQFLYVFPEWTLDSFQSND----FNLNYLFNILDNIEE----------------------------------------
--------------------------------------------------DYLIRGKSAILLSTIIEVCVKLSHKNLYEK
VIPIFDYESILS------------------------MPRLIGKGSNPILGGSSAHHLIFCKLSQYII-------------
---------DKIMSIMMKE---SFNHLLIRMLINSCSK-------SLPICLSSL------------------GELSF---
--------------------------------------------------------------------------------
--------------------------------------------HIPKYILSIIHVNDSFWGVKFEILNLLNRFDYTLIE
YYERKNNETSIS----------------------------------------LSTQPLLQIIV-DLIWKYIGDDNEKVRK
LSCMNLIQLLPY-PNVMNNIHAQLNTSNTLT----KTSSQMVSIFERYSSNY--DNRLLKQIISSDILK----YRNVIRD
-------------------------------------------------------------------------------H
ELTNVVLVITR-CISQLSLVKD--------DKHTFIGILKLLSLVAKKYSYTNTHNSNVSNSNNSVS-------------
---------------------------------------MIKPVIAYYSIEVLELLLD-KLKYSSEISTDLSVHSMIIKT
MGLYITQLKH------------------------------------LNEAKVLYITEHLLEYEQFMIDLITNVFDEQYIK
QLST-------------------------------------------------------------------------IQS
EYQKHMHKYVYDKLYNNIYQSAKSSISNAII-----------------DSTYSRDAISIMRYQLLKTLYYILLNGSPSC-
--IEKYTISM----IQYLNFNARYEKKYSILCIQELFVSLFGKKDKYYNLNIPSYENMKPVFINDEYDVISNNDVKKSNG
LFDKIFVEGKKYSIYARRAMNSDL-----NSNRVRTRSLLVPYGESTSPSK---NTTGTTGGGSNTPSTKKAFSYDS-QF
---LNT-GKTYRQILGMFNPVVIGLTKYFKHTHDRSLQNV-VLFMLIRMICIGIDFSQLDKDSTFIKFIFNQLEKFDEPD
FV--LYQIM---DFLSVLLFIVKYQHFP--------------ENPFDSIVKL---VQSTFNSSQFEKNGN----------
------------------------------------------------SILKSISPVMIRGFLCEIRTE-----------
------------------------KVEKSYGNLMLNEFLKNVTLPECQSVLTLLLRNVHHSTLTCSNTNNTTGNASSSSN
SNNTSSKDATSLPWIELSNSILKEWVVKHNLQVDVDWNLISNISNHFQTN---NIATTYYNHTVNSNSGGLTSNSSASNG
NQSMNLKSNLVFQN-RCKKE---NVQYEFNNCEFIIELSKIFYFIDALYININDQAKIVTHLIDSFDEHLDQNSLEKQVQ
TPSSVQHKENMNEKLSVINSLLKSLIFMKLLNRIDKKQANVQE-------------------------------------
-----------------------------------------------------------------------NLKNLERFL
QSISNA--------LNLYLNHRDTSSIIVIKYLTCEMLTVTIELQE----------------------------------
---RLYIKLLTHEHVRQSDHLNSIFHNQILHILKLFNINYLKHYDFTIYTL----LFSLLLAHSKVEKQFGVSFLNYLYG
FYHSNIYNFNILNNTQLLLG------------------------------------------------------------
---------------------------------------------------------------INESIASDENNLTYHEF
VI--------QQKS-VFLSMINIIVNYQ------------------------DNIIELFKQ-CE-----INNLSNRIWKE
IFNHFDEPLI--EKFLEKFCRDIC---CENDLVGLFDELNDKFKSQL-HLNDLRILFKFIKN-NIKKEHLI-------WL
HPKIVNQLEERLKIETTF-------------------------MKRKVISDMIKYINSNIEKPNENSKLNQEFK------
------------------------------------------------------------------------------NL
DLILEKVKNEMF--KNQNEIPPSKLVNNFFTYNNLVSNPLVISNFLIEYMDKNELKYVPSIVSNLNIQSINNILVH--FK
DNVEFITSLLIHLKSKEQILPFIEFTF------------------------NELNNIPYNFTSYLKLSNLLSKLLSKCRS
SNDLIQLYD-------------KNMVINFTINFIELFYLERIQKHNVDITDVDYILSLILQILYSFGNSIEYYSENLLLI
LNNPEIDLNLNTNNTS----SNTTKTTTSTVEETKNT-----------------------------------TLLLMEDD
YVDS--------FATTTEEPTEQEPQQEDQSPNKETNNSILEMNEDERRVL-----KFIKLSCQLIIDATSVSSQSINY-
---NKDINILKYLKLILFK-------TFQLYPNMQASNEDSDIYGSVGNTTSLYGFSIGN-------------RIPFISY
HHLKLIRSIGLELSKCFIN-LVY-DPYLP-NMETQYFPRI---------DIEQVQTLIFMIQEIGCNEEIFKQLF-----
-EMSFDLLKMEITQPFDEIHVLFIKLLT--------------------------------CMICRMNQPPSL--------
-SNNFSSNILSSFDNFGNSLLGIQHGGNNLNS-ILNSVEKY-LLKSTGSTNSSGTSGSFTG---GIGTSNNRNSFNGSFG
NMS-----------------------------------------------------------------------------
--NLIDKNSNTTRQSISVEE-----------------------IYSKALFNSFMLFIHDSIQKFSKNN------------
---LMITKELVKSLILIMENNIVLFAVNNGTYSVQWLHELFKNIYKECNLYEDWILGQYALYGLSKTYAILHS-NNA-KD
V----NEDFIIKTMES-SLVNNHL--KQSALQSVLSFIECGN---------RNIV-LKLLPYLASNIQTWLLDKE---QT
VYNQ-------LLLMKMVTQMVQ---QYP-EASVHQLTKKTMESLFNLS---DDIDAPLTIVVTIFKSLQKLLI-NYSLS
QFERSLI-------------------------------------------------------------------------
--------------------------------------------------------------------------------
-----------------EAMTSIKQSTMITRNDNTNAVTNRNDAGMMNKIVTPFKKMTIDTSTFSNFTQML--------A
QNKTMLINRKSTAGS--MQSSSNTATVNTSSSTLPSNKTNNSSRISTEKPSITATSNNISI------TVGSGIPNSTTNT
ASSSV------------APTSNNNTATTKMKQFMSFFTTKKQTTPPTSSTTTTTPAVNQPSLTPPTNPTSGSLTSSPSLS
SLPMSRSMSMTSIVSSMARSSEKLQT-----LSQTRRVLLL------------------GLMSTSMYT------SSCSTQ
QQLDSQR-----------------------------------------------------------------ERAKVN--
--------ILH-LIEQFH--DGEIDREGEIIL-RFIPQLMVDFFDN-----EQILPLLYNEFLSSK--THPLLLS--LLL
SLHMPHSLN-------DRKVFENWITMSMQTLCLKQPTCGALWALMCLFISVCI-----GEFDHHYATLVYFGSNYGL--
---------------------VHEWNDISSHA--FLLYGLIFYN-YLSK---------HEMDGAINVFKNVVLPQLIQDS
KDQLIYVKLLKSLLF----LINSNNGATLQTKSLEDFF
